# Supplementary material for: Efficient [(NHC)Au(NTf2)]-catalyzed hydrohydrazidation of terminal and internal alkynes
Source: publisher site journal article supplement (doi:10.3762/bjoc.16.175), 2020-08-26
Supplement: Additional file 1 [file 1860-5397-16-175-S1.pdf]

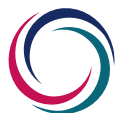

## Supporting Information

for

### Efficient [(NHC)Au(NTf<sub>2</sub>)]-catalyzed hydrohydrazidation of terminal and internal alkynes

Maximillian Heidrich and Herbert Plenio

*Beilstein J. Org. Chem.* **2020**, *16*, 2080–2086. doi:10.3762/bjoc.16.175

### Characterization data and copies of NMR spectra and mass spectrometric data

## Table of contents

|                                                               |     |
|---------------------------------------------------------------|-----|
| 1. Experimental section.....                                  | S2  |
| 1.1. Synthesis of gold complexes <b>2a</b> and <b>2</b> ..... | S2  |
| 1.2. Terminal alkynes.....                                    | S4  |
| 1.3. Internal alkynes .....                                   | S9  |
| 2. NMR spectra .....                                          | S13 |
| 2.1. NMR spectra of complexes .....                           | S13 |
| 2.2. NMR spectra of hydrohydrazidation products.....          | S18 |
| 2.2.1. Terminal alkynes as substrates.....                    | S18 |
| 2.2.2. Internal alkynes as substrates .....                   | S34 |
| 3. Mass spectra .....                                         | S44 |
| 4. Gas chromatographic measurements .....                     | S67 |
| 5. References .....                                           | S68 |

## 1. Experimental section

### 1.1. Synthesis of gold complexes 2a and 2

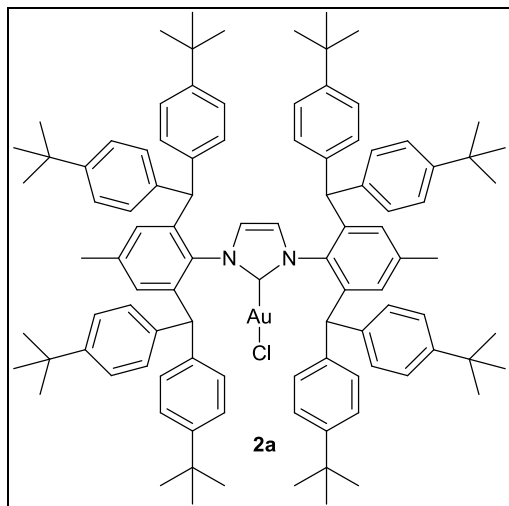

To a solution of bis(4-*tert*-butyl-diphenylmethyl)phenyl)imidazolium chloride salt (100 mg, 0.072 mmol, 1 equiv) in acetone (2 mL) [AuCl(Me<sub>2</sub>S)] (23 mg, 0.079 mmol, 1.1 equiv) and finely powdered potassium carbonate (69 mg, 0.50 mmol, 7.0 equiv) were added. The mixture was stirred at 50 °C for 5 h. The solvent was evaporated under reduced pressure and the residue suspended in 2 mL of DCM. The suspension was filtered through a pad of celite and then the celite washed with CH<sub>2</sub>Cl<sub>2</sub>. The filtrate was concentrated and pentane was added. The precipitate was collected by filtration and purified via column chromatography (cyclohexane/ethyl acetate 2:1, v/v) to obtain the corresponding gold complex **2a** (77 mg, 0.048 mmol, 67% yield) as white solid. The <sup>1</sup>H NMR and <sup>13</sup>C NMR data were in accord with the literature data.<sup>[1]</sup>

<sup>1</sup>H NMR (500 MHz, CDCl<sub>3</sub>) δ 7.25 – 7.21 (m, 8H), 7.18 – 7.11 (m, 16H), 6.87 (s, 4H), 6.79 (d, *J* = 8.0 Hz, 8H), 5.79 (s, 2H), 5.32 (s, 4H), 2.24 (s, 6H), 1.25 (d, *J* = 2.2 Hz, 72H).

<sup>13</sup>C NMR (126 MHz, CDCl<sub>3</sub>) δ 174.79, 149.11, 149.04, 141.19, 139.98, 139.76, 133.66, 130.09, 129.27, 128.98, 125.23, 124.97, 123.11, 50.21, 34.36, 34.34, 31.39, 31.36, 21.88.

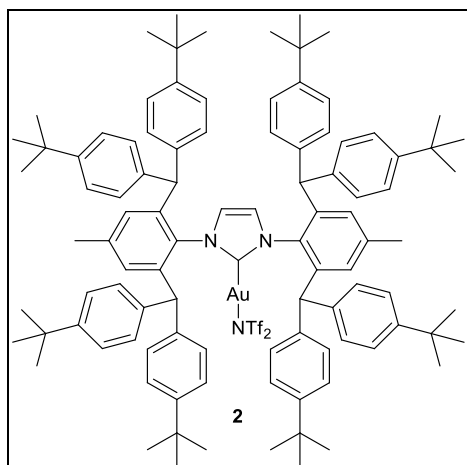

To a solution of the (NHC)AuCl complex **2a** (77 mg, 0.048 mmol, 1 equiv) in DCM (5 mL) silver bis(trifluoromethanesulfonyl)amide (20 mg, 0.048 mmol, 1 equiv) was added and the mixture was stirred at rt for 30 min. The formed suspension was filtered through a plug of celite and the celite washed with a small amount of DCM. The filtrate was evaporated under reduced pressure and the residue dried in vacuo to yield complex **2** (85 mg, 0.046 mmol, 96% yield) as white solid. The  $^1\text{H}$  NMR and  $^{13}\text{C}$  NMR data are in accord with the literature data.<sup>[2]</sup>

$^1\text{H}$  NMR (500 MHz,  $\text{CDCl}_3$ )  $\delta$  7.26 (d,  $J$  = 8.4 Hz, 8H), 7.11 (d,  $J$  = 8.8 Hz, 16H), 6.87 (s, 4H), 6.74 (d,  $J$  = 8.3 Hz, 8H), 5.38 (s, 2H), 5.21 (s, 4H), 2.26 (s, 6H), 1.28 (s, 36H), 1.22 (s, 36H).

$^{13}\text{C}$  NMR (126 MHz,  $\text{CDCl}_3$ )  $\delta$  167.61, 149.41, 141.54, 140.33, 140.11, 139.48, 133.33, 129.92, 129.54, 129.09, 125.42, 125.05, 123.44, 50.82, 34.52, 34.46, 31.50, 31.47, 21.95.

## 1.2. Terminal alkynes

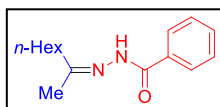

**N'-(Octan-2-ylidene)benzohydrazide (6a):** 1-Octyne (55 mg, 0.50 mmol) and benzhydrazide (68 mg, 0.50 mmol) were reacted and purified according to the general procedure a) for the hydrohydrazidation of alkynes to afford **6a** (115 mg, 0.47 mmol, 94% yield) as light yellow solid. The  $^1\text{H}$  NMR data are in accord with the literature data.<sup>[3]</sup>

$^1\text{H}$  NMR (300 MHz,  $\text{DMSO}-d_6$ ):  $\delta$  10.37 (s, 1H), 7.89 – 7.67 (m, 2H), 7.64 – 7.37 (m, 3H), 2.43 – 2.16 (m, 2H), 2.03 – 1.85 (m, 3H), 1.62 – 1.38 (m, 2H), 1.38 – 1.17 (m, 6H), 0.97 – 0.76 (m, 3H).

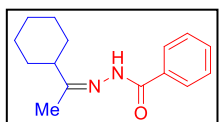

**N'-(1-Cyclohexylethylidene)benzohydrazide (6b):** Cyclohexylacetylene (54 mg, 0.50 mmol) and benzhydrazide (68 mg, 0.50 mmol) were reacted and purified according to the general procedure for the hydrohydrazidation of alkynes to afford **6b** (90 mg, 0.37 mmol, 74% yield) as colorless solid.

The  $^1\text{H}$  NMR,  $^{13}\text{C}$  NMR and MS data are in accord with the literature data.<sup>[4]</sup>

$^1\text{H}$  NMR (500 MHz,  $\text{DMSO}-d_6$ ):  $\delta$  10.33 (s, 1H), 7.81 (d,  $J$  = 7.6 Hz, 2H), 7.50 (m, 3H), 2.24 (s, 1H), 1.91 (s, 3H), 1.71 (m, 5H), 1.39 – 1.15 (m, 5H).

$^{13}\text{C}$  NMR (126 MHz,  $\text{DMSO}-d_6$ ):  $\delta$  165.85, 163.16, 134.27, 131.15, 128.22, 127.57, 46.59, 29.73, 25.64, 25.57, 14.92.

HRMS (APCI):  $m/z$  calcd. for  $\text{C}_{15}\text{H}_{21}\text{N}_2\text{O}$ : 245.16484  $[\text{M}+\text{H}]^+$ ; found: 245.16509.

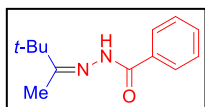

**N'-(3,3-Dimethylbutan-2-ylidene)benzohydrazide (6c):** *tert*.-Butylacetylene (41 mg, 0.50 mmol) and benzhydrazide (68 mg, 0.50 mmol) were reacted and purified according to the general procedure for the hydrohydrazidation of alkynes to afford **6c** (80 mg, 0.37 mmol, 73% yield) as a colorless solid. The  $^1\text{H}$  NMR,  $^{13}\text{C}$  NMR and MS data are in accord with the literature data.<sup>[5]</sup>

$^1\text{H}$  NMR (300 MHz,  $\text{DMSO}-d_6$ ):  $\delta$  10.29 (s, 1H), 7.82 (d,  $J$  = 7.1 Hz, 2H), 7.61 – 7.38 (m, 3H), 1.93 (s, 3H), 1.14 (s, 9H).

$^{13}\text{C}$  NMR (75 MHz,  $\text{DMSO}-d_6$ ):  $\delta$  168.26, 163.23, 134.35, 131.19, 128.27, 127.59, 38.70, 27.64, 12.88.

HRMS (APCI):  $m/z$  calcd. for  $\text{C}_{13}\text{H}_{19}\text{N}_2\text{O}$ : 219.14919  $[\text{M}+\text{H}]^+$ ; found: 219.14897.

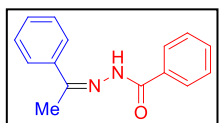

**N'-(1-Phenylethylidene)benzohydrazide (6d):** Phenylacetylene (51 mg, 0.50 mmol) and benzhydrazide (68 mg, 0.50 mmol) were reacted and purified according to the general procedure for the hydrohydrazidation of alkynes to afford **6d** (117 mg, 0.49 mmol, 98% yield) as colorless solid. The

$^1\text{H}$  NMR data are in accord with the literature data.<sup>[3]</sup>

$^1\text{H}$  NMR (500 MHz,  $\text{DMSO}-d_6$ ):  $\delta$  10.78 (s, 1H), 8.00 – 7.70 (m, 4H), 7.60 (t,  $J$  = 7.3 Hz, 1H), 7.53 (t,  $J$  = 7.5 Hz, 2H), 7.50 – 7.39 (m, 3H), 2.39 (s, 3H).

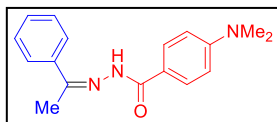

**4-(Dimethylamino)-N'-(1-phenylethylidene)benzohydrazide (6e):**

Phenylacetylene (51 mg, 0.50 mmol) and 4-dimethylaminobenzhydrazide (90 mg, 0.50 mmol) were reacted and purified according to the general procedure for the hydrohydrazidation of alkynes to afford

**6e** (135 mg, 0.48 mmol, 96% yield) as light yellow solid.

$^1\text{H}$  NMR (500 MHz, DMSO- $d_6$ ):  $\delta$  10.37 (s, 1H), 7.82 (d,  $J$  = 6.5 Hz, 4H), 7.48 – 7.37 (m, 3H), 6.75 (d,  $J$  = 8.7 Hz, 2H), 3.00 (s, 6H), 2.35 (s, 3H).

$^{13}\text{C}$  NMR (126 MHz, DMSO- $d_6$ ):  $\delta$  152.42, 138.40, 129.66, 129.15, 128.34, 126.28, 120.13, 110.75, 39.73, 14.21. (Because of overlapping signals, some aromatic C signals could not be observed.)

HRMS (ESI):  $m/z$  calcd. for  $\text{C}_{17}\text{H}_{20}\text{N}_3\text{O}$ : 282.16009  $[\text{M}+\text{H}]^+$ ; found: 282.15997.

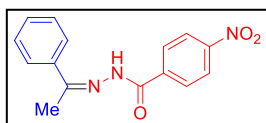

**4-Nitro-N'-(1-phenylethylidene)benzohydrazide (6f):**

Phenylacetylene (51 mg, 0.50 mmol) and 4-nitrobenzhydrazide (90 mg, 0.50 mmol) were reacted and purified according to the general procedure for the hydrohydrazidation of alkynes to afford **6f** (102 mg, 0.55 mmol, 72% yield) as yellow solid. The

$^1\text{H}$  NMR data are in accord with the literature data.<sup>[3]</sup>

$^1\text{H}$  NMR (300 MHz, DMSO- $d_6$ ):  $\delta$  11.09 (s, 1H), 8.34 (d,  $J$  = 8.3 Hz, 2H), 8.21 – 7.26 (m, 7H), 2.39 (s, 3H).

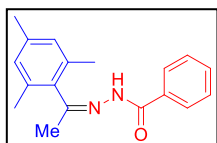

**N'-(1-Mesitylethylidene)benzohydrazide (6g):**

Mesitylacetylene (72 mg, 0.50 mmol) and benzhydrazide (68 mg, 0.50 mmol) were reacted and purified according to the general procedure for the hydrohydrazidation of alkynes to afford **6g** (156 mg, 0.55 mmol, 97% yield) as colorless solid. The

$^1\text{H}$  NMR data are in accord with the literature data.<sup>[3]</sup>

$^1\text{H}$  NMR (500 MHz, DMSO- $d_6$ ):  $\delta$  9.33 (s, 1H), 7.50 (t,  $J$  = 7.3 Hz, 2H), 7.45 – 7.36 (m, 3H), 6.98 (s, 2H), 2.27 (s, 3H), 2.17 (s, 3H), 2.11 (s, 6H).

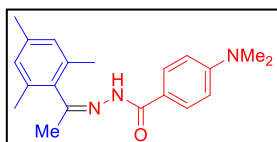

**4-(Dimethylamino)-N'-(1-mesitylethylidene)benzohydrazide (6h):**

Mesitylacetylene (72 mg, 0.50 mmol) and 4-dimethylaminobenzhydrazide (90 mg, 0.50 mmol) were reacted and purified according to the general procedure for the hydrohydrazidation of alkynes to afford

**6h** (144 mg, 0.45 mmol, 89% yield) as light yellow solid.

$^1\text{H}$  NMR (300 MHz, DMSO- $d_6$ ):  $\delta$  10.32 (s, 1H), 7.78 (d,  $J$  = 8.8 Hz, 2H), 6.87 (s, 2H), 6.73 (d,  $J$  = 8.7 Hz, 2H), 2.99 (s, 6H), 2.24 (s, 3H), 2.17 (s, 3H), 2.16 (s, 6H).

$^{13}\text{C}$  NMR (75 MHz, DMSO- $d_6$ ):  $\delta$  152.28, 137.43, 136.45, 134.37, 129.41, 127.88, 120.11, 110.69, 39.68, 20.60, 19.09, 18.75. (Because of low sample concentration, the amide C signal and some aromatic C signals could not be observed.)

HRMS (ESI):  $m/z$  calcd. for  $\text{C}_{20}\text{H}_{26}\text{N}_3\text{O}$ : 324.20704  $[\text{M}+\text{H}]^+$ ; found: 324.20717.

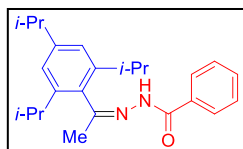

***N'*-(1-(2,4,6-Triisopropylphenyl)ethylidene)benzohydrazide (6i):** 2,4,6-Triisopropylphenylacetylene (114 mg, 0.50 mmol) and benzhydrazide (68 mg, 0.50 mmol) were reacted and purified according to the general procedure for the hydrohydrazidation of alkynes to afford **6i** (150 mg, 0.41 mmol, 82% yield) as colorless solid.

$^1\text{H}$  NMR (500 MHz, DMSO- $d_6$ ):  $\delta$  10.74 (s, 1H), 7.93 (s, 2H), 7.64 – 7.43 (m, 3H), 7.04 (s, 2H), 2.95 – 2.77 (m, 3H), 2.24 (s, 3H), 1.22 (s, 3H), 1.20 (s, 6H), 1.19 (s, 3H), 1.18 – 1.12 (m, 6H).

$^{13}\text{C}$  NMR (126 MHz, DMSO- $d_6$ ):  $\delta$  163.12, 161.54, 148.20, 145.05, 135.53, 133.88, 131.37, 128.24, 127.78, 120.44, 33.62, 30.00, 24.51, 23.94, 23.84, 20.67.

HRMS (APCI):  $m/z$  calcd. for  $\text{C}_{24}\text{H}_{33}\text{N}_2\text{O}$ : 365.25874  $[\text{M}+\text{H}]^+$ ; found: 365.25903.

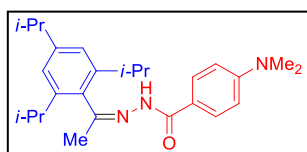

**4-(Dimethylamino)-*N'*-(1-(2,4,6-triisopropylphenyl)ethylidene)benzohydrazide: (6j):** 2,4,6-Triisopropylphenylacetylene (114 mg, 0.50 mmol) and 4-dimethylaminobenzhydrazide (90 mg, 0.50 mmol) were reacted and purified according to the general procedure for the hydrohydrazidation of alkynes to afford **6j** (97 mg, 0.24 mmol, 48% yield) as colorless solid.

$^1\text{H}$  NMR (500 MHz, DMSO- $d_6$ ):  $\delta$  10.33 (s, 1H), 7.79 (d,  $J$  = 8.4 Hz, 2H), 7.03 (s, 2H), 6.72 (d,  $J$  = 8.4 Hz, 2H), 2.98 (s, 6H), 2.92 – 2.81 (m, 3H), 2.21 (s, 3H), 1.21 (d,  $J$  = 6.9 Hz, 6H), 1.19 (d,  $J$  = 6.9 Hz, 6H), 1.15 (d,  $J$  = 6.8 Hz, 6H).

$^{13}\text{C}$  NMR (126 MHz, DMSO- $d_6$ ):  $\delta$  152.24, 148.08, 145.14, 135.80, 129.43, 120.41, 120.09, 110.65, 33.62, 29.97, 24.50, 23.96, 23.88, 20.34. (Because of low sample concentration, the amide C signal and some aromatic C signals could not be observed.)

HRMS (ESI):  $m/z$  calcd. for  $\text{C}_{26}\text{H}_{38}\text{N}_3\text{O}$ : 408.30094  $[\text{M}+\text{H}]^+$ ; found: 408.30119.

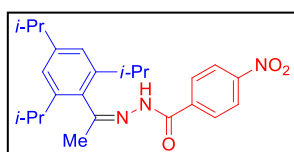

**4-Nitro-*N'*-(1-(2,4,6-triisopropylphenyl)ethylidene)benzohydrazide (6k):** 2,4,6-Triisopropylphenylacetylene (114 mg, 0.50 mmol) and 4-nitrobenzhydrazide (90 mg, 0.50 mmol) were reacted and purified according to the general procedure for the hydrohydrazidation of alkynes to afford **6k** (150 mg, 0.37 mmol, 73% yield) as colorless solid.

$^1\text{H}$  NMR (500 MHz, DMSO- $d_6$ )  $\delta$  11.08 (s, 1H), 8.35 (d,  $J$  = 8.3 Hz, 2H), 8.18 (d,  $J$  = 8.3 Hz, 2H), 7.05 (s, 2H), 2.95 – 2.79 (m, 3H), 2.25 (s, 3H), 1.25 – 1.14 (m, 18H).

$^{13}\text{C}$  NMR (126 MHz, DMSO- $d_6$ )  $\delta$  163.26, 161.52, 149.08, 148.33, 144.97, 139.60, 135.30, 129.34, 123.40, 120.49, 33.62, 30.03, 24.52, 23.92, 23.80, 20.98.

HRMS (ESI):  $m/z$  calcd. for  $\text{C}_{24}\text{H}_{32}\text{N}_3\text{O}_3$ : 410.24382  $[\text{M}+\text{H}]^+$ ; found: 410.24408.

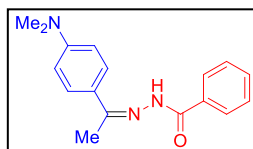

***N'*-(1-(4-(Dimethylamino)phenyl)ethylidene)benzohydrazide (6l):** 4-Dimethylaminophenylacetylene (73 mg, 0.50 mmol) and benzhydrazide (68 mg, 0.50 mmol) were reacted and purified according to the general procedure for the hydrohydrazidation of alkynes to afford **6l** (139 mg, 0.49 mmol, 98% yield) as light yellow solid.

$^1\text{H}$  NMR (500 MHz, DMSO- $d_6$ ):  $\delta$  10.60 (s, 1H), 7.88 (d,  $J$  = 7.5 Hz, 2H), 7.73 (d,  $J$  = 8.5 Hz, 2H), 7.59 – 7.53 (m, 1H), 7.50 (t,  $J$  = 7.6 Hz, 2H), 6.74 (d,  $J$  = 8.5 Hz, 2H), 2.96 (s, 6H), 2.28 (s, 3H).

$^{13}\text{C}$  NMR (126 MHz, DMSO- $d_6$ ):  $\delta$  163.28, 156.98, 151.16, 134.32, 131.22, 128.28, 127.63, 127.59, 125.13, 111.38, 39.78, 14.22.

HRMS (APCI):  $m/z$  calcd. for  $\text{C}_{17}\text{H}_{20}\text{N}_3\text{O}$ : 282.16009  $[\text{M}+\text{H}]^+$ ; found: 282.16011.

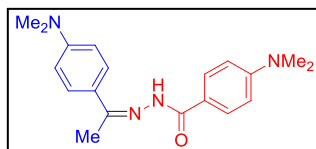

**4-(Dimethylamino)-N'-(1-(4-(dimethylamino)phenyl)ethylidene)-benzohydrazide (6m):** 4-Dimethylaminophenylacetylene (73 mg, 0.50 mmol) and 4-dimethylaminobenzhydrazide (90 mg, 0.50 mmol) were reacted and purified according to the general

procedure for the hydrohydrazidation of alkynes to afford **6m** (150 mg, 0.46 mmol, 92% yield) as yellow solid.

$^1\text{H}$  NMR (500 MHz, DMSO- $d_6$ ):  $\delta$  10.20 (s, 1H), 7.83 – 7.76 (m, 2H), 7.69 (d,  $J$  = 8.3 Hz, 2H), 6.77 – 6.71 (m, 4H), 2.99 (s, 7H), 2.95 (s, 6H), 2.26 (s, 3H).

$^{13}\text{C}$  NMR (126 MHz, DMSO- $d_6$ ):  $\delta$  163.98, 153.99, 152.39, 151.14, 129.42, 127.31, 125.97, 120.95, 111.58, 110.86, 39.78, 39.66, 13.64.

HRMS (ESI):  $m/z$  calcd. for  $\text{C}_{19}\text{H}_{25}\text{N}_4\text{O}$ : 325.20229  $[\text{M}+\text{H}]^+$ ; found: 325.20241.

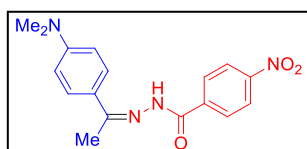

**N'-(1-(4-(Dimethylamino)phenyl)ethylidene)-4-nitrobenzohydrazide (6n):** 4-Dimethylphenylacetylene (73 mg, 0.50 mmol) and 4-nitrobenzhydrazide (90 mg, 0.50 mmol) were reacted and purified according to the general procedure for the hydrohydrazidation of

alkynes to afford **6n** (159 mg, 0.55 mmol, 97% yield) as orange solid.

$^1\text{H}$  NMR (500 MHz, DMSO- $d_6$ ):  $\delta$  11.05 – 10.88 (m, 1H), 8.36 – 8.28 (m, 3H), 8.11 (d,  $J$  = 8.3 Hz, 2H), 7.94 (d,  $J$  = 8.0 Hz, 1H), 7.74 (d,  $J$  = 8.5 Hz, 2H), 7.43 (d,  $J$  = 7.9 Hz, 1H), 6.74 (d,  $J$  = 8.5 Hz, 2H), 6.64 (d,  $J$  = 8.1 Hz, 1H), 2.97 (s, 6H), 2.90 (s, 2H), 2.30 (s, 3H), 2.26 (s, 1H).

$^{13}\text{C}$  NMR (126 MHz, DMSO- $d_6$ ):  $\delta$  161.79, 158.28, 151.35, 148.95, 140.12, 130.48, 129.21, 127.72, 127.13, 124.78, 123.43, 122.72, 111.36, 39.76, 14.42.

HRMS (ESI):  $m/z$  calcd. for  $\text{C}_{17}\text{H}_{19}\text{N}_4\text{O}_3$ : 327.14517  $[\text{M}+\text{H}]^+$ ; found: 327.14546.

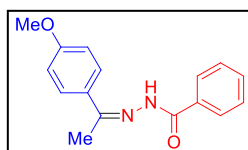

**N'-(1-(4-Methoxyphenyl)ethylidene)benzohydrazide (6o):** 4-Methoxyphenylacetylene (66 mg, 0.50 mmol) and benzhydrazide (68 mg, 0.50 mmol) were reacted and purified according to the general procedure for the hydrohydrazidation of alkynes to afford **6o** (131 mg,

0.49 mmol, 98% yield) as colorless solid. The  $^1\text{H}$  NMR data are in accord with the literature data.<sup>[3]</sup>

$^1\text{H}$  NMR (500 MHz, DMSO- $d_6$ ):  $\delta$  10.69 (s, 1H), 7.87 (d,  $J$  = 30.3 Hz, 4H), 7.71 – 7.41 (m, 4H), 7.01 (d,  $J$  = 7.9 Hz, 2H), 3.82 (s, 3H), 2.35 (s, 3H).

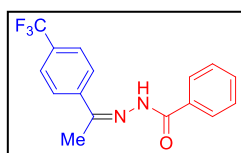

**N'-(1-(4-(Trifluoromethyl)phenyl)ethylidene)benzohydrazide (6p):** 4-Trifluoromethylphenylacetylene (85 mg, 0.50 mmol) and benzhydrazide (68 mg, 0.50 mmol) were reacted and purified according to the general procedure for the hydrohydrazidation of alkynes to afford **6p** (136 mg,

0.44 mmol, 89% yield) as colorless solid. The  $^1\text{H}$  NMR,  $^{13}\text{C}$  NMR and MS data are in accord with the literature data.<sup>[5]</sup>

$^1\text{H}$  NMR (500 MHz, DMSO- $d_6$ ):  $\delta$  10.89 (s, 1H), 8.13 – 7.96 (m, 2H), 7.93 – 7.85 (m, 2H), 7.79 (d,  $J$  = 8.0 Hz, 2H), 7.59 (t,  $J$  = 7.4 Hz, 1H), 7.52 (t,  $J$  = 7.5 Hz, 2H), 2.41 (s, 3H).

$^{13}\text{C}$  NMR (126 MHz, DMSO- $d_6$ ):  $\delta$  164.18, 153.14, 142.00, 133.92, 131.53, 129.70 – 129.13 (m), 128.23, 127.41, 127.04, 125.24, 125.21, 123.09, 120.92, 14.40.

HRMS (APCI):  $m/z$  calcd. for  $\text{C}_{16}\text{H}_{14}\text{F}_3\text{N}_2\text{O}$ : 307.10527  $[\text{M}+\text{H}]^+$ ; found: 307.10522.



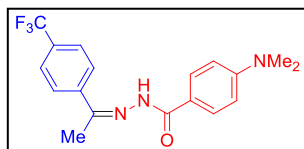

**4-(Dimethylamino)-N'-(1-(4-(trifluoromethyl)phenyl)ethylidene)-benzohydrazide (6q):** 4-Trifluoromethylphenylacetylene (85 mg, 0.50 mmol) and 4-dimethylaminobenzhydrazide (90 mg, 0.50 mmol) were reacted and purified according to the general procedure for the

hydrohydrazidation of alkynes to afford **6q** (99 mg, 0.28 mmol, 57% yield) as light yellow solid.  $^1\text{H}$  NMR (500 MHz,  $\text{DMSO}-d_6$ ):  $\delta$  10.52 (s, 1H), 8.04 (d,  $J = 8.1$  Hz, 2H), 7.84 – 7.77 (m, 4H), 6.77 (d,  $J = 9.0$  Hz, 2H), 3.01 (s, 6H), 2.41 (s, 3H).

$^{13}\text{C}$  NMR (126 MHz,  $\text{DMSO}-d_6$ ):  $\delta$  152.46, 142.29, 129.82, 129.09, 128.82, 128.19, 126.88, 125.22, 123.15, 119.85, 110.80, 110.68, 39.69, 14.04. (Because of overlapping signals, some aromatic C signals and signals of the  $\text{CF}_3$  multiplet could not be observed.)

HRMS (ESI):  $m/z$  calcd. for  $\text{C}_{18}\text{H}_{19}\text{F}_3\text{N}_3\text{O}$ : 350.14747  $[\text{M}+\text{H}]^+$ ; found: 350.14751.

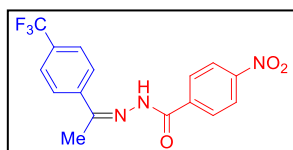

**4-Nitro-N'-(1-(4-(trifluoromethyl)phenyl)ethylidene)benzohydrazide (6r):** 4-Trifluoromethylphenylacetylene (85 mg, 0.50 mmol) and 4-nitrobenzhydrazide (90 mg, 0.50 mmol) were reacted and purified according to the general procedure for the

hydrohydrazidation of alkynes to afford **6r** (70 mg, 0.55 mmol, 76% yield) as colorless solid.  $^1\text{H}$  NMR (300 MHz,  $\text{DMSO}-d_6$ ):  $\delta$  11.23 (s, 1H), 8.35 (d,  $J = 8.3$  Hz, 2H), 8.20 – 7.65 (m, 6H), 2.43 (s, 3H).

$^{13}\text{C}$  NMR (75 MHz,  $\text{DMSO}-d_6$ ):  $\delta$  162.71, 154.55, 149.21, 141.76, 139.61, 130.73 – 129.92 (m), 129.56, 127.21, 126.98, 125.95, 125.31, 125.25, 123.38, 122.34, 14.73.

HRMS (ESI):  $m/z$  calcd. for  $\text{C}_{16}\text{H}_{13}\text{F}_3\text{N}_3\text{O}_3$ : 352.09035  $[\text{M}+\text{H}]^+$ ; found: 352.09046.

### 1.3. Internal alkynes

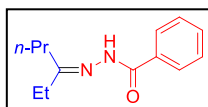

***N'*-(Hexan-3-ylidene)benzohydrazide (7a):** 3-Hexyne (41 mg, 0.50 mmol) and benzhydrazide (68 mg, 0.50 mmol) were reacted and purified according to the general procedure for the hydrohydrazidation of alkynes to afford **7a** (104 mg, 0.48 mmol, 95% yield) as colorless solid. The  $^1\text{H}$  NMR data are in accord with the literature data.<sup>[3]</sup>

$^1\text{H}$  NMR (300 MHz,  $\text{DMSO}-d_6$ ):  $\delta$  10.46 (s, 1H), 7.86 – 7.68 (m, 2H), 7.57 – 7.37 (m, 3H), 2.44 – 2.18 (m, 4H), 1.64 – 1.41 (m, 2H), 1.15 – 0.98 (m, 3H), 0.91 (t,  $J$  = 7.1 Hz, 3H).

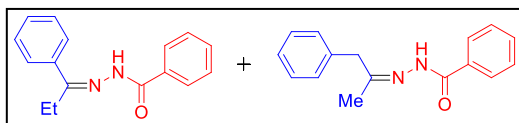

***N'*-(1-Phenylbutylidene)benzohydrazide and *N'*-(1-phenylbutan-2-ylidene)benzohydrazide (7b):** 1-Phenyl-1-butyne (65 mg, 0.50 mmol) and

benzhydrazide (68 mg, 0.50 mmol) were reacted and purified according to the general procedure for the hydrohydrazidation of alkynes to afford a mixture of **7b** (110 mg, 0.55 mmol, 83% yield, 48:52 ratio) as colorless solid.

$^1\text{H}$  NMR (500 MHz,  $\text{DMSO}-d_6$ ):  $\delta$  10.64 (s, 1H), 10.56 (s, 1H), 7.84 – 7.78 (m, 2H), 7.75 – 7.69 (m, 2H), 7.57 – 7.42 (m, 7H), 7.37 – 7.27 (m, 6H), 7.28 – 7.19 (m, 5H), 3.83 (s, 2H), 3.65 (s, 2H), 2.33 (q,  $J$  = 7.6 Hz, 2H), 2.30 – 2.20 (m, 2H), 1.11 – 1.00 (m, 3H), 0.94 (t, 4H).

$^{13}\text{C}$  NMR (126 MHz,  $\text{DMSO}-d_6$ ):  $\delta$  165.41, 163.76, 163.39, 137.31, 136.32, 134.13, 131.23, 128.92, 128.73, 128.60, 128.44, 128.22, 126.51, 126.46, 42.19, 35.69, 29.79, 22.21, 10.78, 9.75.

HRMS (APCI):  $m/z$  calcd. for  $\text{C}_{17}\text{H}_{19}\text{N}_2\text{O}$ : 267.14919  $[\text{M}+\text{H}]^+$ ; found: 267.14934.

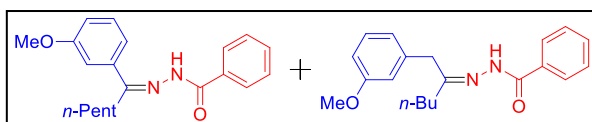

***N'*-(1-(3-Methoxyphenyl)hexylidene)benzohydrazide and *N'*-(1-(3-methoxyphenyl)hexane-2-ylidene)benzohydrazide (7c):** 1-

(Hex-1-yn-1-yl)-3-methoxybenzene (94 mg, 0.50 mmol) and benzhydrazide (68 mg, 0.50 mmol) were reacted and purified according to the general procedure for the hydrohydrazidation of alkynes to afford a mixture of **7c** (126 mg, 0.39 mmol, 78% yield, 50:50 ratio) as pale yellow, viscous oil.

$^1\text{H}$  NMR (500 MHz,  $\text{DMSO}-d_6$ ):  $\delta$  10.66 (s, 1H), 10.61 (s, 1H), 7.83 – 7.72 (m, 4H), 7.58 – 7.39 (m, 8H), 7.26 – 7.21 (m, 2H), 6.88 – 6.78 (m, 5H), 3.79 (s, 3H), 3.74 (s, 3H), 3.72 (s, 4H), 2.36 – 2.28 (m, 2H), 2.24 (s, 2H), 1.49 – 1.25 (m, 8H), 0.84 – 0.79 (m, 6H).

$^{13}\text{C}$  NMR (126 MHz,  $\text{DMSO}-d_6$ ):  $\delta$  164.84, 163.33, 159.43, 159.34, 138.87, 137.75, 134.09, 131.26, 129.64, 129.43, 128.23, 127.56, 121.16, 120.91, 119.05, 114.86, 114.66, 114.52, 111.84, 54.92, 42.59, 36.14, 35.75, 31.06, 28.58, 28.09, 27.01, 25.75, 22.11, 21.87, 21.76, 13.79, 13.70, 13.59.

HRMS (EI):  $m/z$  calcd. for  $\text{C}_{20}\text{H}_{24}\text{N}_2\text{O}_2$ : 324.1832  $[\text{M}]$ ; found: 324.1823

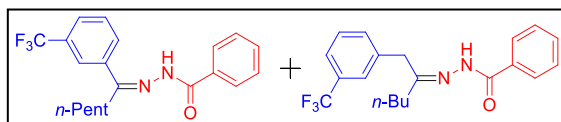

***N'*-(1-(3-(Trifluoromethyl)phenyl)hexylidene)-benzohydrazide and *N'*-(1-(3-(trifluoromethyl)phenyl)hexane-2-ylidene)benzohydrazide (**7d**):**

1-(Hex-1-yn-1-yl)-3-(trifluoromethyl)benzene (113 mg, 0.50 mmol) and benzhydrazide (68 mg, 0.50 mmol) were reacted and purified according to the general procedure for the hydrohydrazidation of alkynes to afford a mixture of **7d** (107 mg, 0.32 mmol, 65% yield, 48:52 ratio) as colorless viscous oil.

$^1\text{H}$  NMR (500 MHz, DMSO- $d_6$ ):  $\delta$  10.73 (s, 1H), 10.64 (s, 1H), 7.83 – 7.38 (m, 19H), 3.94 (s, 2H), 3.81 – 3.70 (m, 2H), 2.35 (t,  $J$  = 7.9 Hz, 2H), 2.28 – 2.19 (m, 2H), 1.55 – 1.43 (m, 2H), 1.42 – 1.35 (m, 2H), 1.29 – 1.18 (m, 4H), 0.86 – 0.75 (m, 6H).

$^{13}\text{C}$  NMR (126 MHz, DMSO- $d_6$ ):  $\delta$  164.36, 163.53, 162.52, 138.89, 137.80, 134.02, 133.24, 132.81, 131.27, 129.61, 129.37, 128.20, 127.57, 125.45, 125.35, 125.31, 123.24, 123.20, 42.03, 36.24, 35.42, 28.93, 27.99, 26.96, 22.05, 21.68, 13.61, 13.53.

HRMS (EI):  $m/z$  calcd. for  $\text{C}_{20}\text{H}_{21}\text{N}_2\text{OF}_2$ : 362.1600 [M]; found: 267.1592.

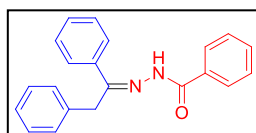

***N'*-(1,2-Diphenylethylidene)benzohydrazide (**7e**):**

Diphenylacetylene (89 mg, 0.50 mmol) and benzhydrazide (68 mg, 0.50 mmol) were reacted and purified according to the general procedure for the hydrohydrazidation of alkynes to afford **7e** (142 mg, 0.45 mmol, 90% yield) as colorless solid.

The  $^1\text{H}$  NMR data are in accord with the literature data.<sup>[3]</sup>

$^1\text{H}$  NMR (500 MHz, DMSO- $d_6$ ):  $\delta$  10.99 (s, 1H), 7.86 (s, 2H), 7.74 (d,  $J$  = 7.6 Hz, 2H), 7.56 (t,  $J$  = 7.4 Hz, 1H), 7.48 (t,  $J$  = 7.6 Hz, 2H), 7.38 (s, 3H), 7.30 (t,  $J$  = 7.5 Hz, 2H), 7.26 – 7.15 (m, 3H), 4.41 (s, 2H).

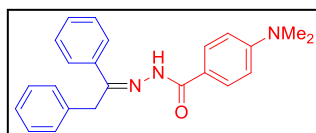

**4-(Dimethylamino)-*N'*-(1,2-diphenylethylidene)benzohydrazide (**7f**):**

Diphenylacetylene (89 mg, 0.50 mmol) and 4-dimethylamino-benzhydrazide (90 mg, 0.50 mmol) were reacted and purified

according to the general procedure for the hydrohydrazidation of alkynes to afford (**7f**) (165 mg, 0.46 mmol, 92% yield) as colorless solid.

$^1\text{H}$  NMR (300 MHz, DMSO- $d_6$ ):  $\delta$  10.54 (s, 1H), 7.83 (d,  $J$  = 6.7 Hz, 2H), 7.67 (d,  $J$  = 8.4 Hz, 2H), 7.39 – 7.17 (m, 8H), 6.72 (d,  $J$  = 7.8 Hz, 2H), 4.41 (s, 2H), 2.98 (d,  $J$  = 2.0 Hz, 6H).

$^{13}\text{C}$  NMR (75 MHz, DMSO- $d_6$ ):  $\delta$  152.39, 137.78, 136.46, 129.68, 128.97, 128.68, 128.32, 128.11, 126.61, 126.33, 119.87, 110.62, 39.65, 32.03.

HRMS (ESI):  $m/z$  calcd. for  $\text{C}_{23}\text{H}_{24}\text{N}_3\text{O}$ : 358.19139 [M+H] $^+$ ; found: 358.19155.

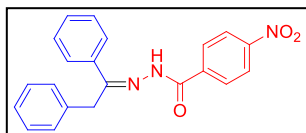

***N'*-(1,2-Diphenylethylidene)-4-nitrobenzohydrazide (7g):** Diphenylacetylene (89 mg, 0.50 mmol) and 4-nitrobenzhydrazide (90 mg, 0.50 mmol) were reacted and purified according to the general procedure for the hydrohydrazidation of alkynes to afford **7g** (143 mg, 0.55 mmol, 79% yield) as colorless solid.

$^1\text{H}$  NMR (300 MHz, DMSO- $d_6$ ):  $\delta$  11.36 (s, 1H), 8.33 (d,  $J$  = 8.3 Hz, 2H), 7.99 (d,  $J$  = 8.4 Hz, 2H), 7.91 – 7.83 (m, 1H), 7.72 – 7.46 (m, 1H), 7.46 – 7.12 (m, 8H), 4.41 (s, 2H).

$^{13}\text{C}$  NMR (75 MHz, DMSO- $d_6$ ):  $\delta$  156.41, 149.03, 139.69, 137.07, 136.27, 129.44, 128.66, 128.35, 128.19, 126.98, 126.34, 123.32, 32.68.

HRMS (ESI):  $m/z$  calcd. for  $\text{C}_{21}\text{H}_{18}\text{N}_3\text{O}_3$ : 360.13427  $[\text{M}+\text{H}]^+$ ; found: 360.13446.

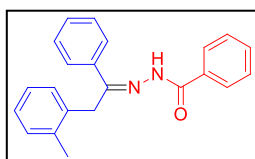

***N'*-(1-Phenyl-2-(*o*-tolyl)ethylidene)benzohydrazide (7h):** 1-Methyl-2-(phenylethynyl)benzene (96 mg, 0.50 mmol) and benzhydrazide (68 mg, 0.50 mmol) were reacted and purified according to the general procedure for the hydrohydrazidation of alkynes to afford **7h** (80 mg, 0.24 mmol, 49% yield) as colorless solid.

$^1\text{H}$  NMR (500 MHz, DMSO- $d_6$ ):  $\delta$  10.90 (s, 1H), 7.83 – 6.83 (m, 20H), 4.29 (s, 2H), 2.38 (s, 3H).

$^{13}\text{C}$  NMR (126 MHz, DMSO- $d_6$ ):  $\delta$  163.10, 147.77, 135.94, 134.30, 133.61, 133.40, 131.72, 130.50, 130.24, 130.06, 129.48, 129.33, 129.20, 128.94, 128.82, 128.45, 128.22, 127.57, 127.53, 127.06, 126.59, 126.25, 44.40, 19.19, 18.74.

HRMS (ESI):  $m/z$  calcd. for  $\text{C}_{22}\text{H}_{21}\text{N}_2\text{O}$ : 329.1648  $[\text{M}+\text{H}]^+$ ; found: 329.1648.

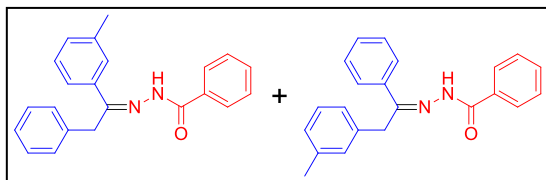

***N'*-(2-Phenyl-1-(*m*-tolyl)ethylidene)benzohydrazide and *N'*-(1-phenyl-2-(*m*-tolyl)ethylidene)benzohydrazide (7i):** 1-Methyl-3-(phenylethynyl)benzene (96 mg, 0.50 mmol) and benzhydrazide (68 mg, 0.50 mmol) were reacted and purified according to the general procedure for the hydrohydrazidation of alkynes to afford a mixture of **7i** (107 mg, 0.33 mmol, 68% yield, 70:30 ratio) as off-white solid.

$^1\text{H}$  NMR (500 MHz, DMSO- $d_6$ ):  $\delta$  10.95 (s, 2H), 7.96 – 6.94 (m, 26H), 4.41 (s, 1H), 4.38 (s, 2H), 2.31 (s, 2H), 2.24 (s, 3H).

$^{13}\text{C}$  NMR (126 MHz, DMSO- $d_6$ ):  $\delta$  164.12, 154.92, 137.76, 137.52, 137.43, 136.41, 136.29, 134.01, 131.46, 129.99, 129.27, 128.81, 128.67, 128.61, 128.36, 128.24, 128.16, 127.86, 127.26, 127.04, 126.81, 126.33, 125.18, 124.16, 32.44, 21.06, 20.99.

HRMS (ESI):  $m/z$  calcd. for  $\text{C}_{22}\text{H}_{21}\text{N}_2\text{O}$ : 329.1648  $[\text{M}+\text{H}]^+$ ; found: 329.1649.

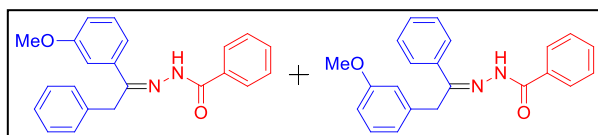

***N'*-(1-(3-Methoxyphenyl)-2-phenyl-ethylidene)benzohydrazide and *N'*-(2-(3-methoxyphenyl)-1-phenylethylidene)benzo-**

**hydrazide (7j):** 1-Methoxy-3-(phenylethynyl)benzene (104 mg, 0.50 mmol) and benzhydrazide (68 mg, 0.50 mmol) were reacted and purified according to the general procedure for the hydrohydrazidation of alkynes to afford a mixture of **7j** (125 mg, 0.36 mmol, 73% yield, 60:40 ratio) as pale yellow, viscous oil.

<sup>1</sup>H NMR (500 MHz, DMSO-*d*<sub>6</sub>): δ 11.01 (s, 1H), 7.93 – 6.73 (m, 14H), 4.41 (s, 2H), 3.85 – 3.54 (m, 3H).

<sup>13</sup>C NMR (126 MHz, DMSO-*d*<sub>6</sub>): δ 164.26, 159.52, 159.22, 155.07, 138.93, 137.89, 137.51, 136.50, 134.00, 131.56, 129.82, 129.46, 129.39, 128.74, 128.42, 128.27, 128.21, 127.92, 126.88, 126.40, 120.35, 119.42, 114.95, 114.31, 112.41, 111.58, 55.07, 54.95, 32.57.

HRMS (EI): *m/z* calcd. for C<sub>22</sub>H<sub>20</sub>N<sub>2</sub>O<sub>2</sub>: 344.1519 [M]; found: 344.1519.

## 2. NMR spectra

### 2.1. NMR spectra of complexes

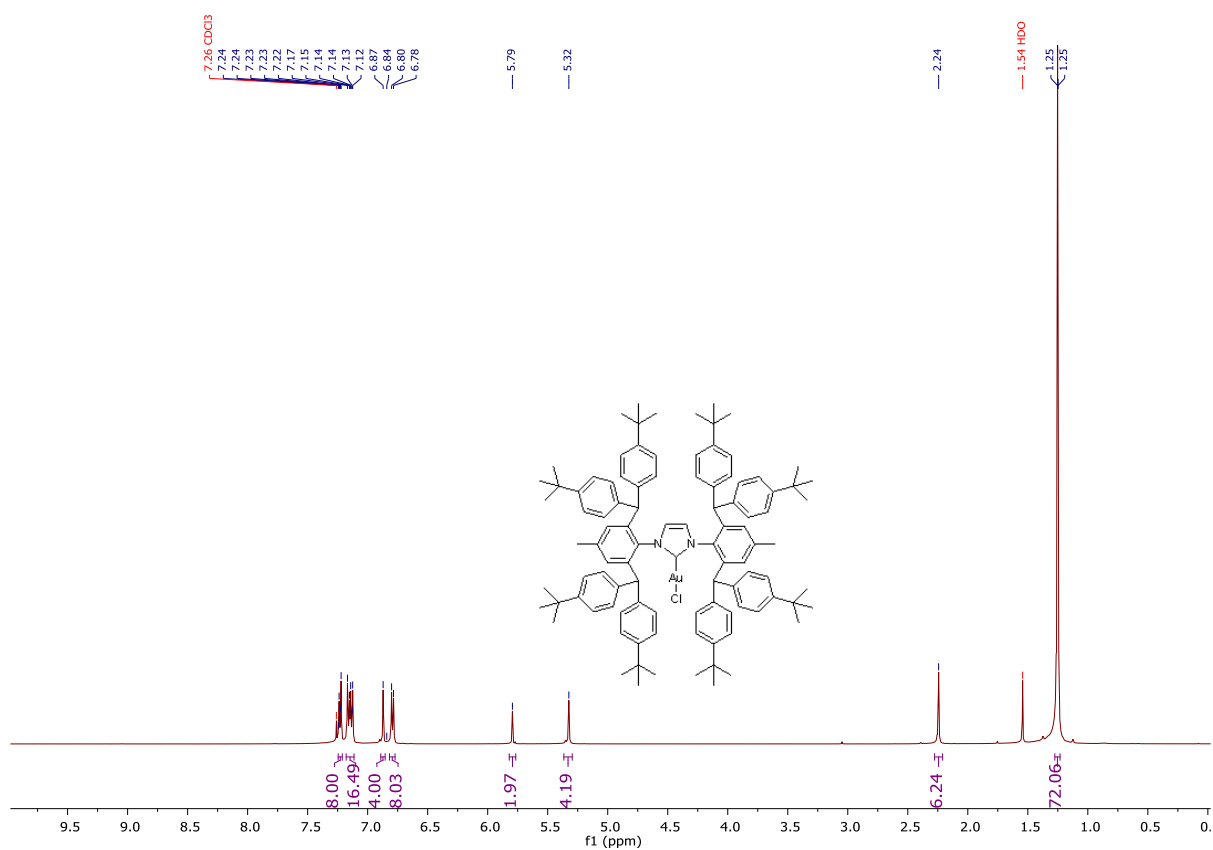

Figure S1: <sup>1</sup>H NMR of complex 2a in CDCl<sub>3</sub>.

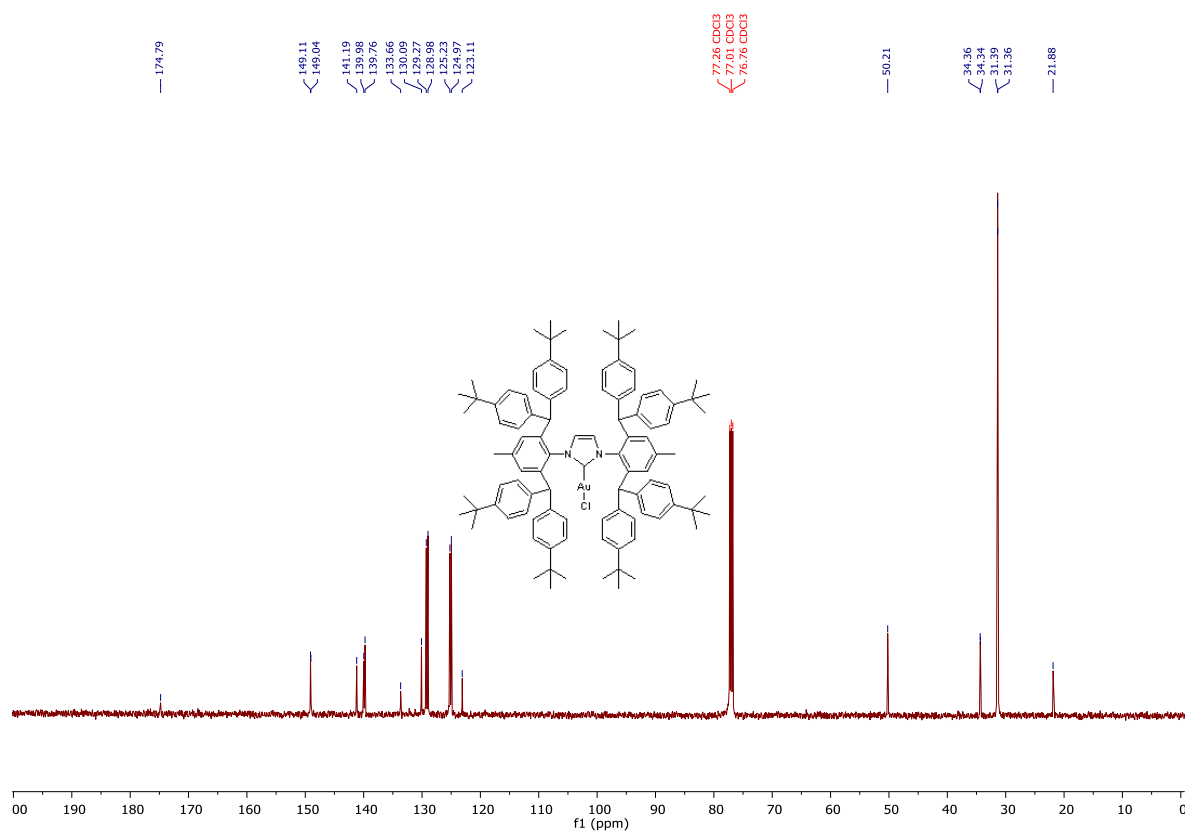

Figure S2:  $^{13}\text{C}$  NMR of complex 2a in  $\text{CDCl}_3$ .

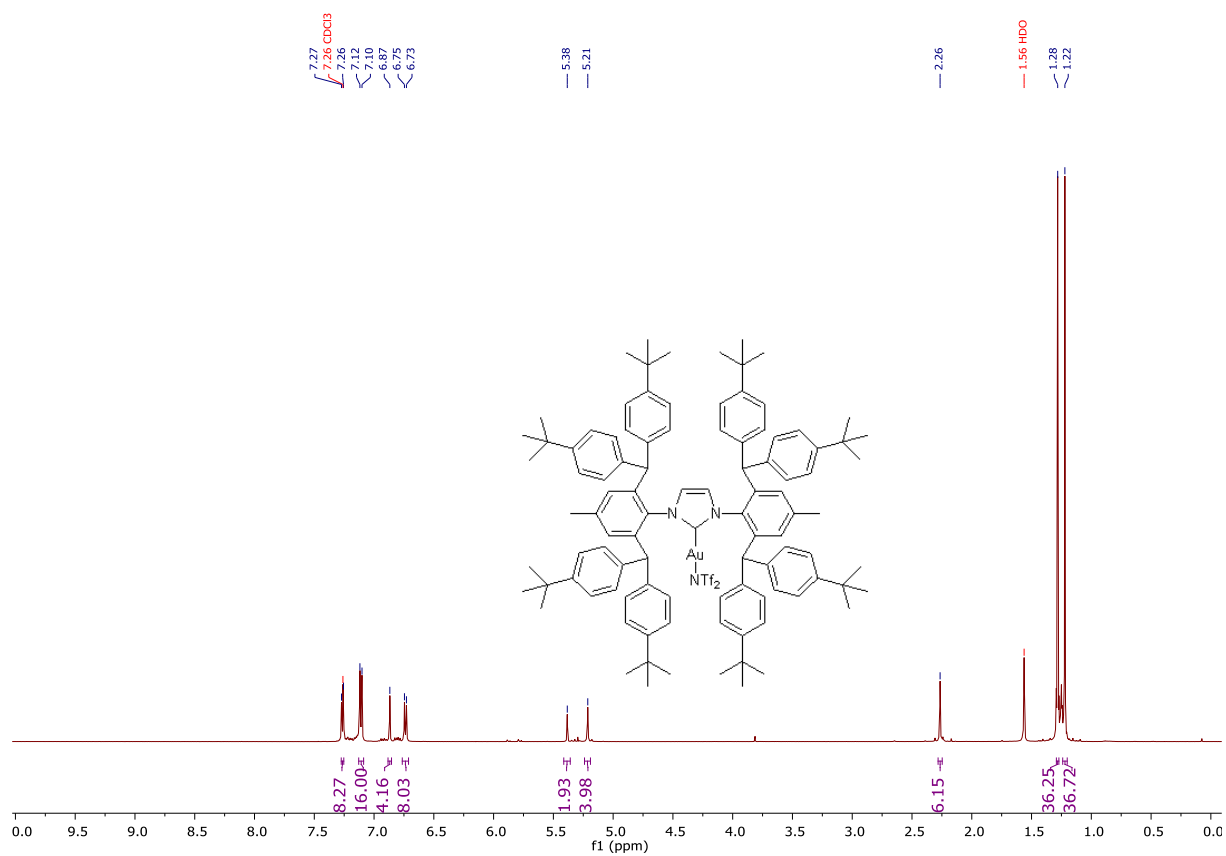

Figure S3:  $^1\text{H}$  NMR of complex 2 in  $\text{CDCl}_3$ .

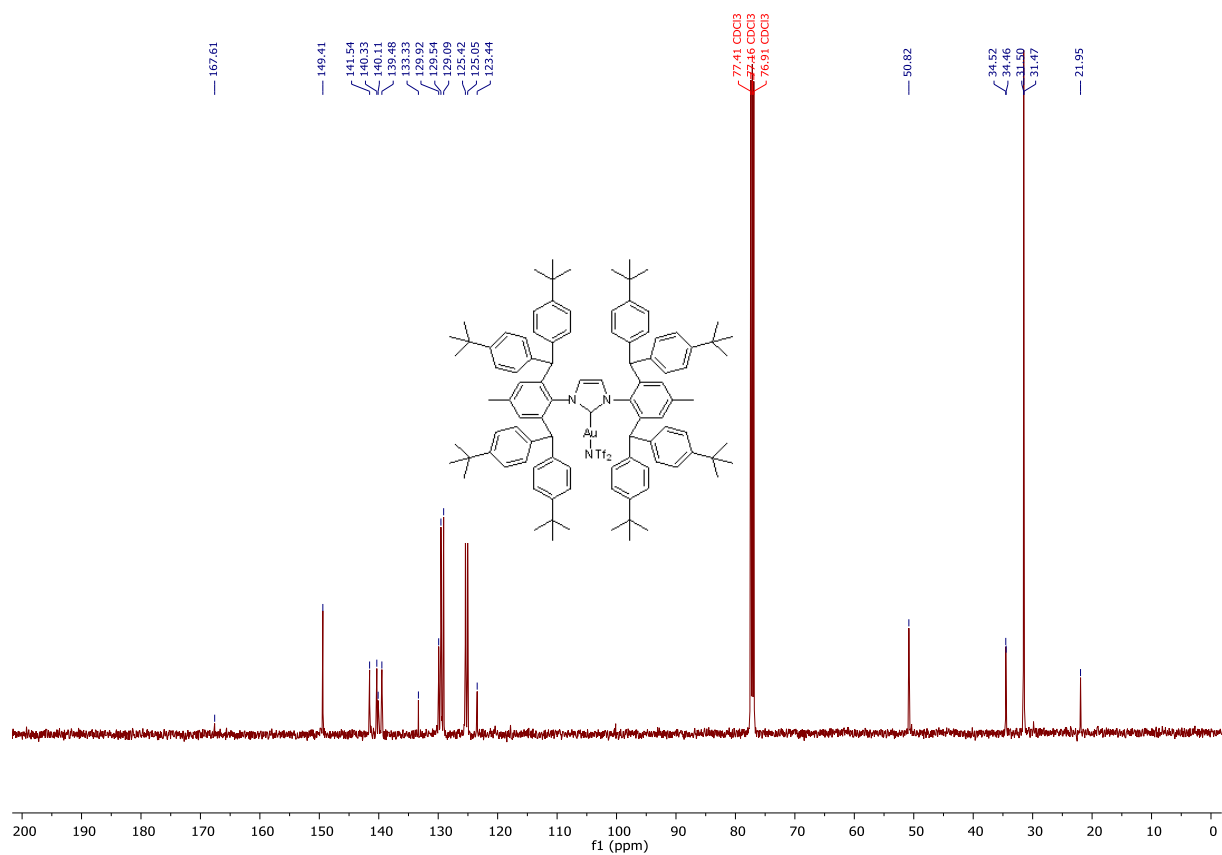

Figure S4:  $^{13}\text{C}$  NMR of complex 2 in  $\text{CDCl}_3$ .

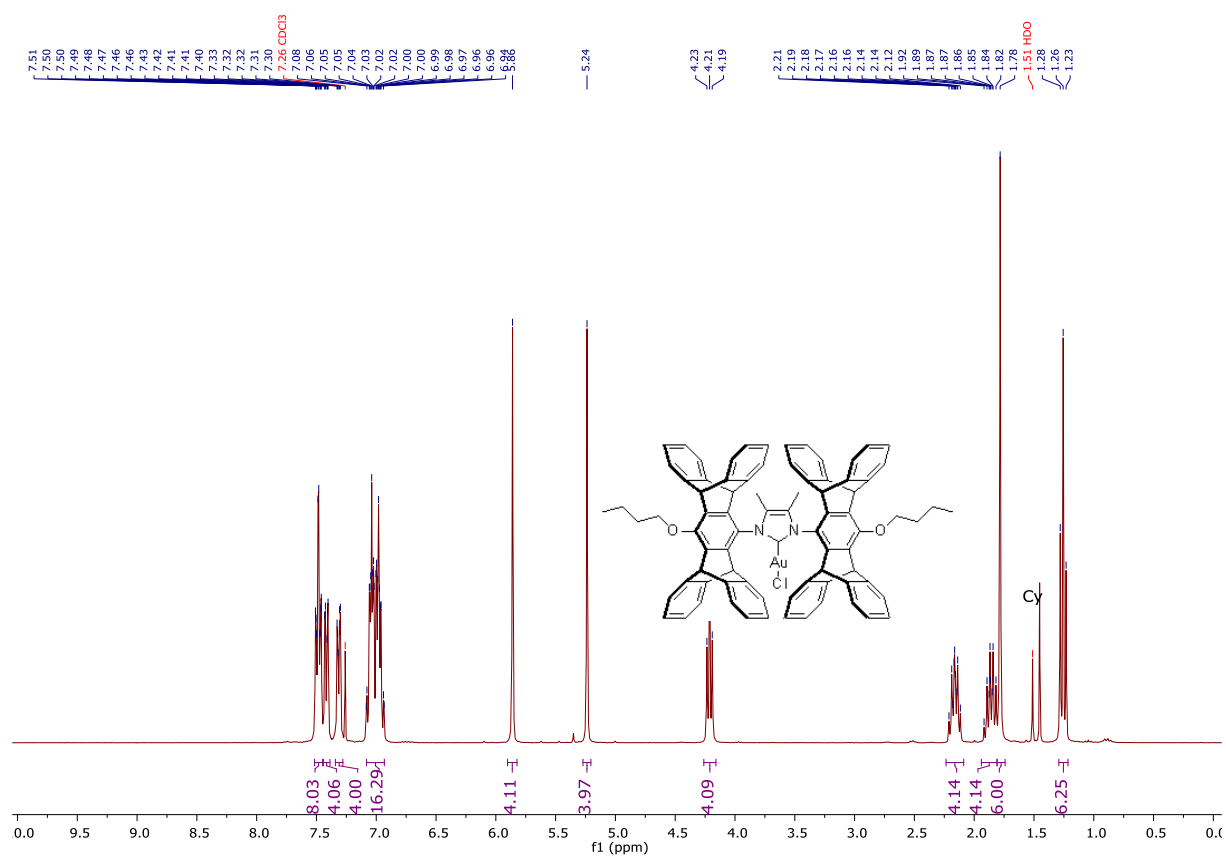

Figure S5:  $^1\text{H}$  NMR of complex 1a in  $\text{CDCl}_3$ .



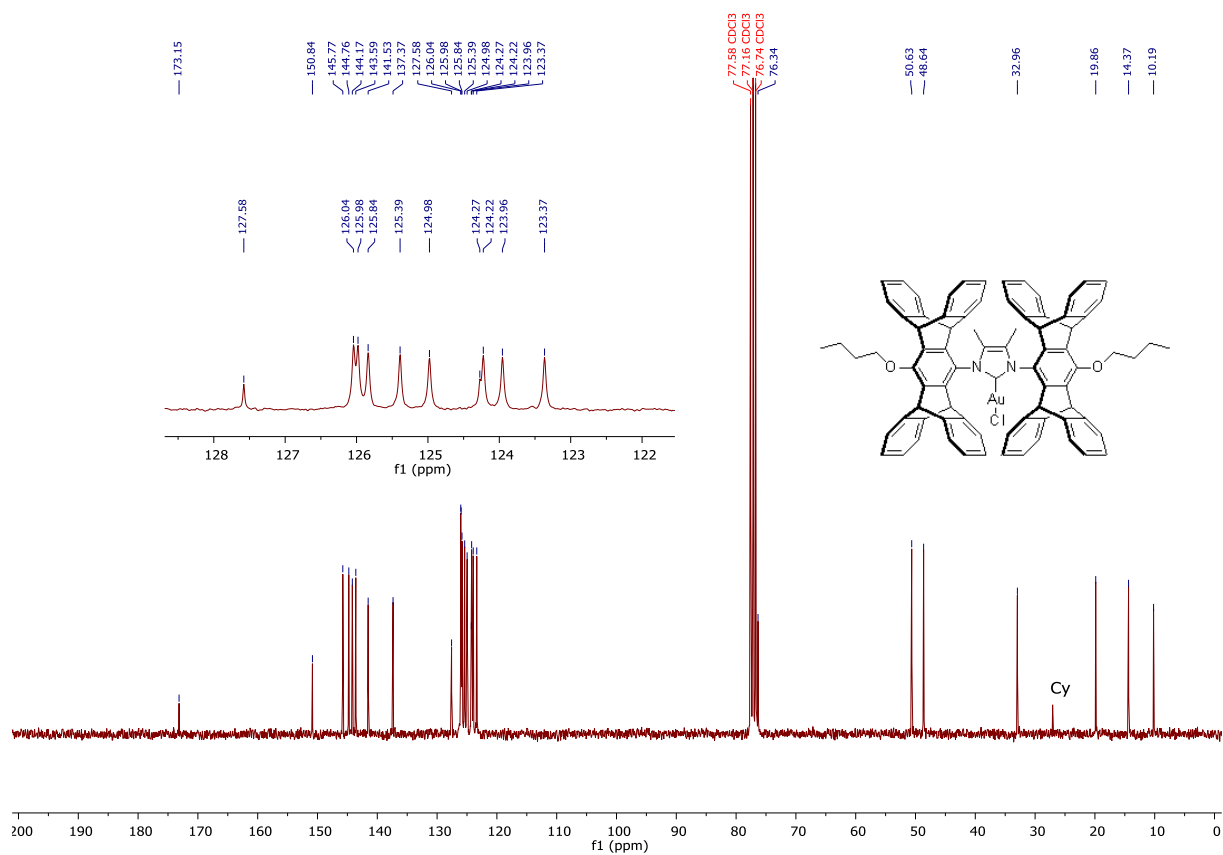

Figure S6:  $^{13}\text{C}$  NMR of complex 1a in  $\text{CDCl}_3$ .

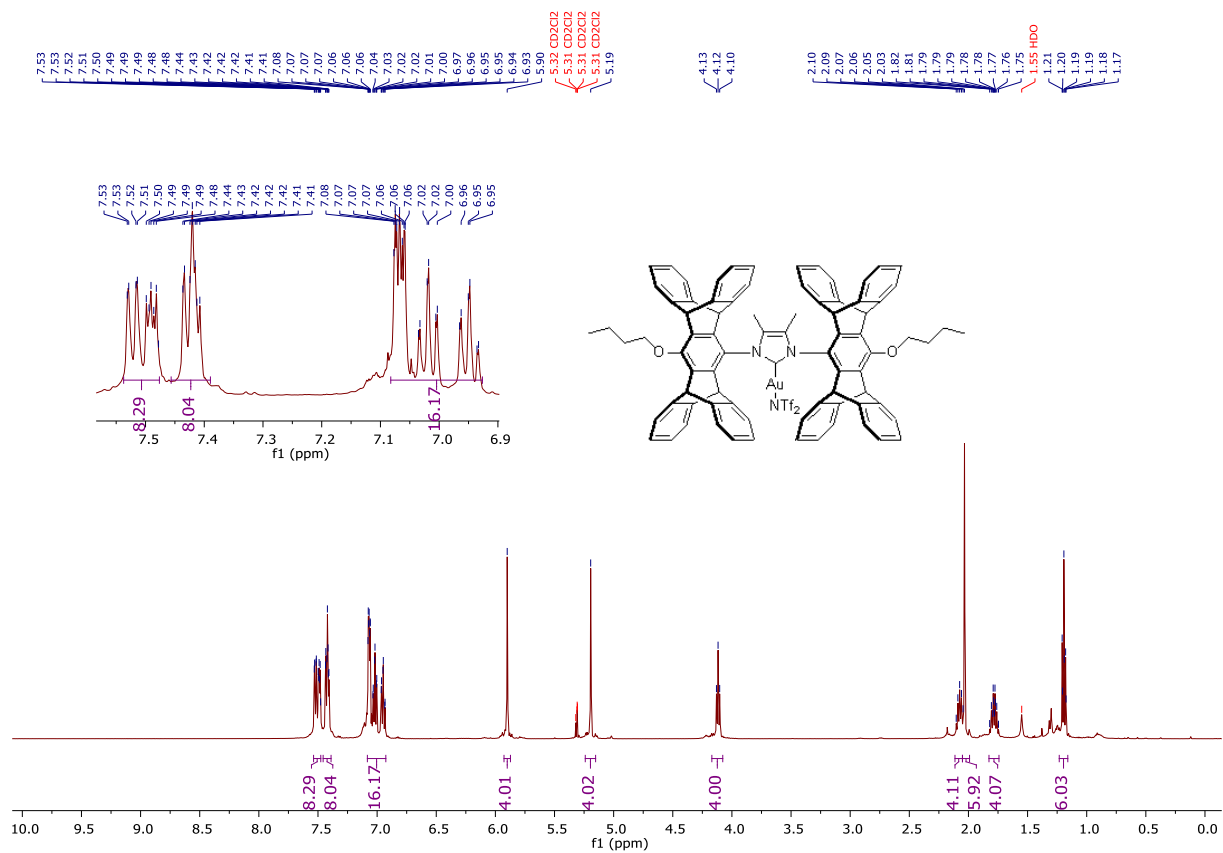

Figure S7:  $^1\text{H}$  NMR of complex 1 in  $\text{CD}_2\text{Cl}_2$ .

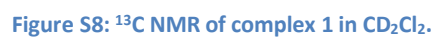

## 2.2. NMR spectra of hydrohydrazidation products

### 2.2.1. Terminal alkynes as substrates

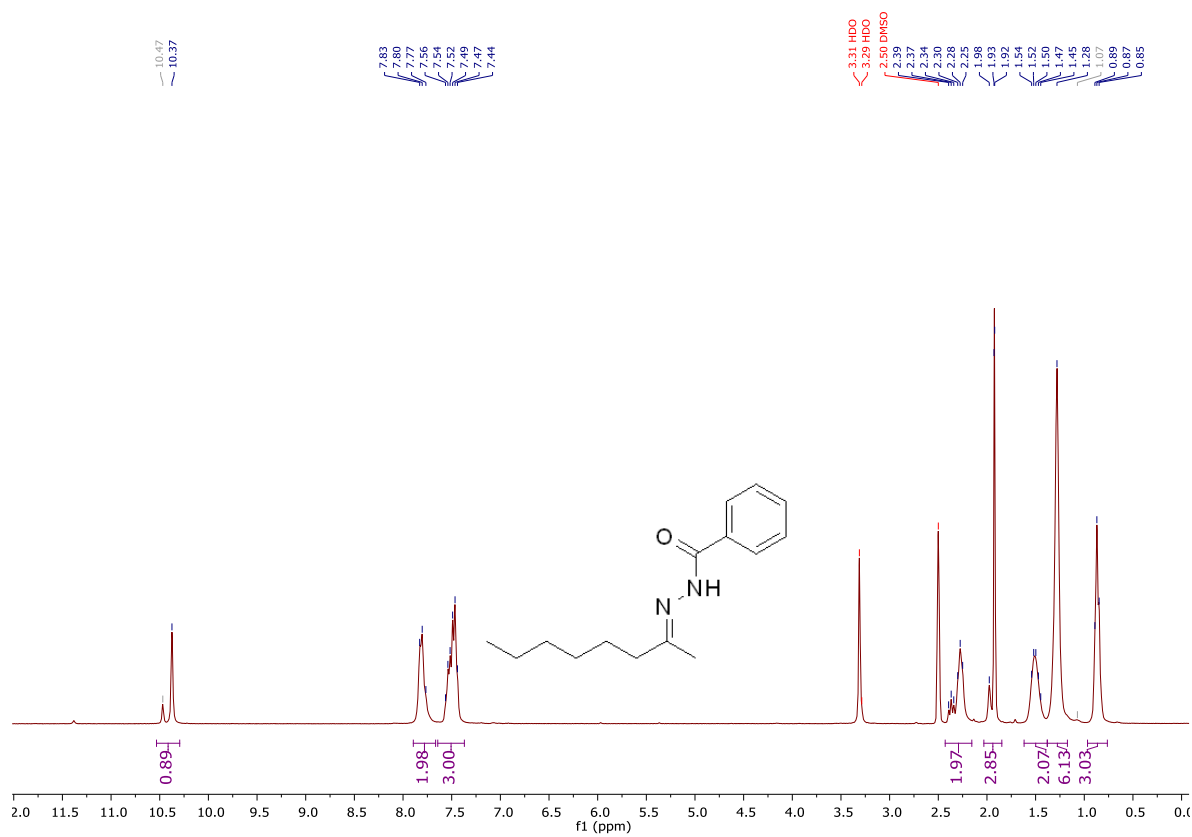

Figure S9:  $^1\text{H}$  NMR of  $N'$ -(octan-2-ylidene)benzohydrazide (6a) in  $\text{DMSO}-d_6$ .

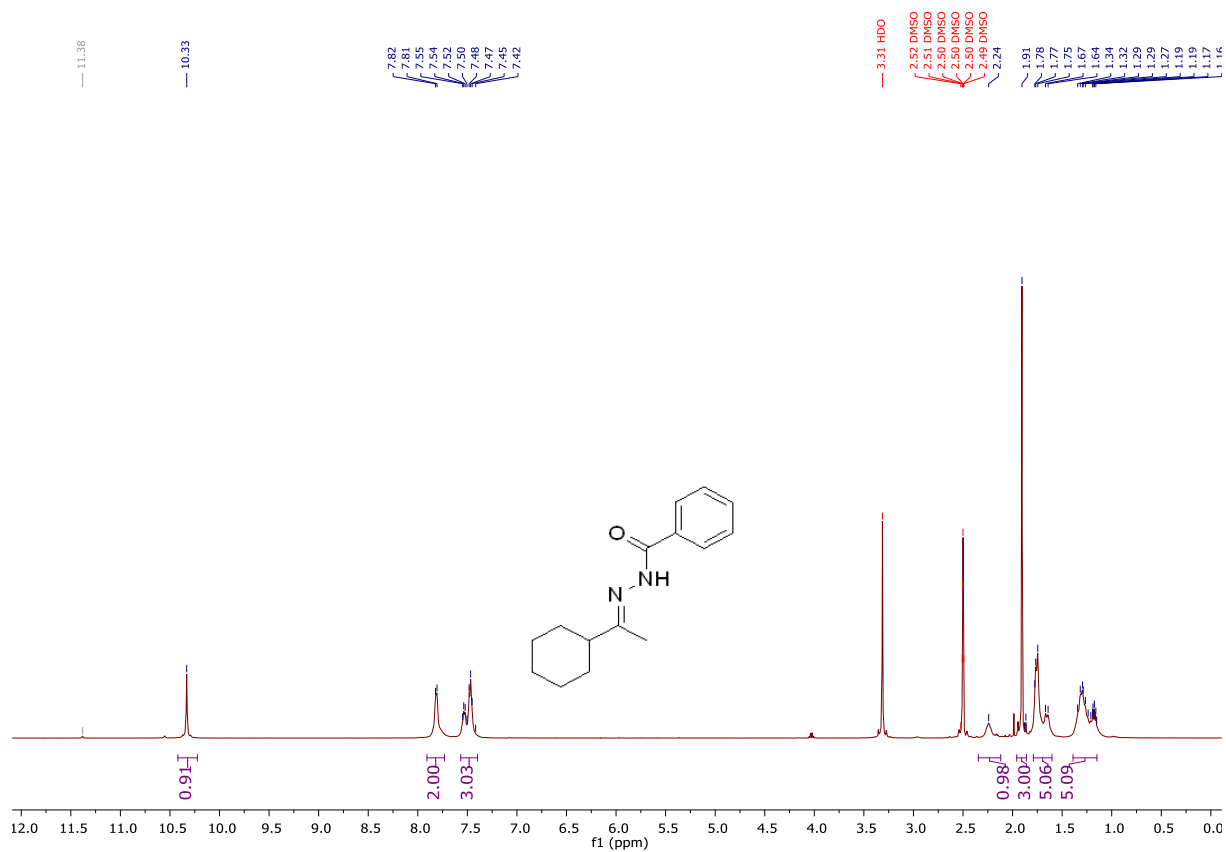

Figure S10: <sup>1</sup>H NMR of *N'*-(1-cyclohexylethylidene)benzohydrazide (6b) in DMSO-*d*<sub>6</sub>.

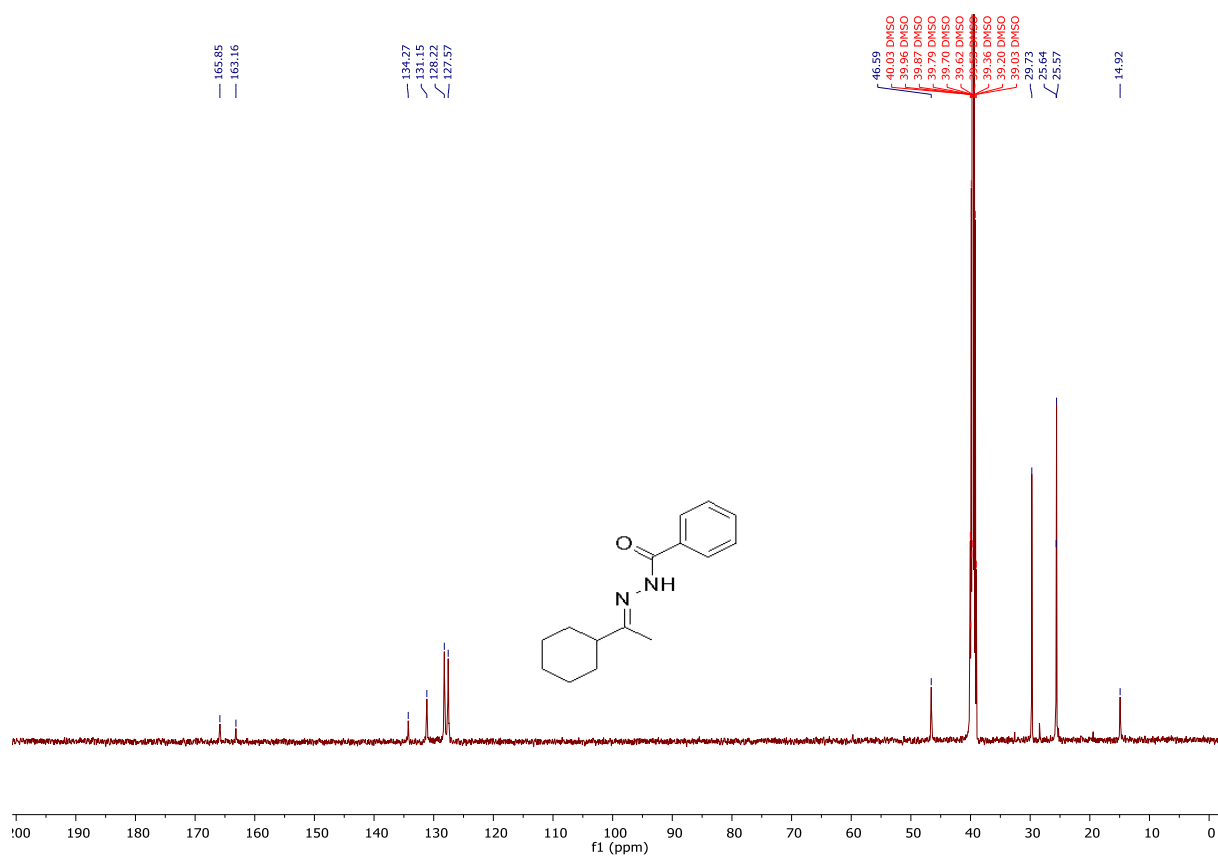

Figure S11: <sup>13</sup>C NMR of *N'*-(1-cyclohexylethylidene)benzohydrazide (6b) in DMSO-*d*<sub>6</sub>.

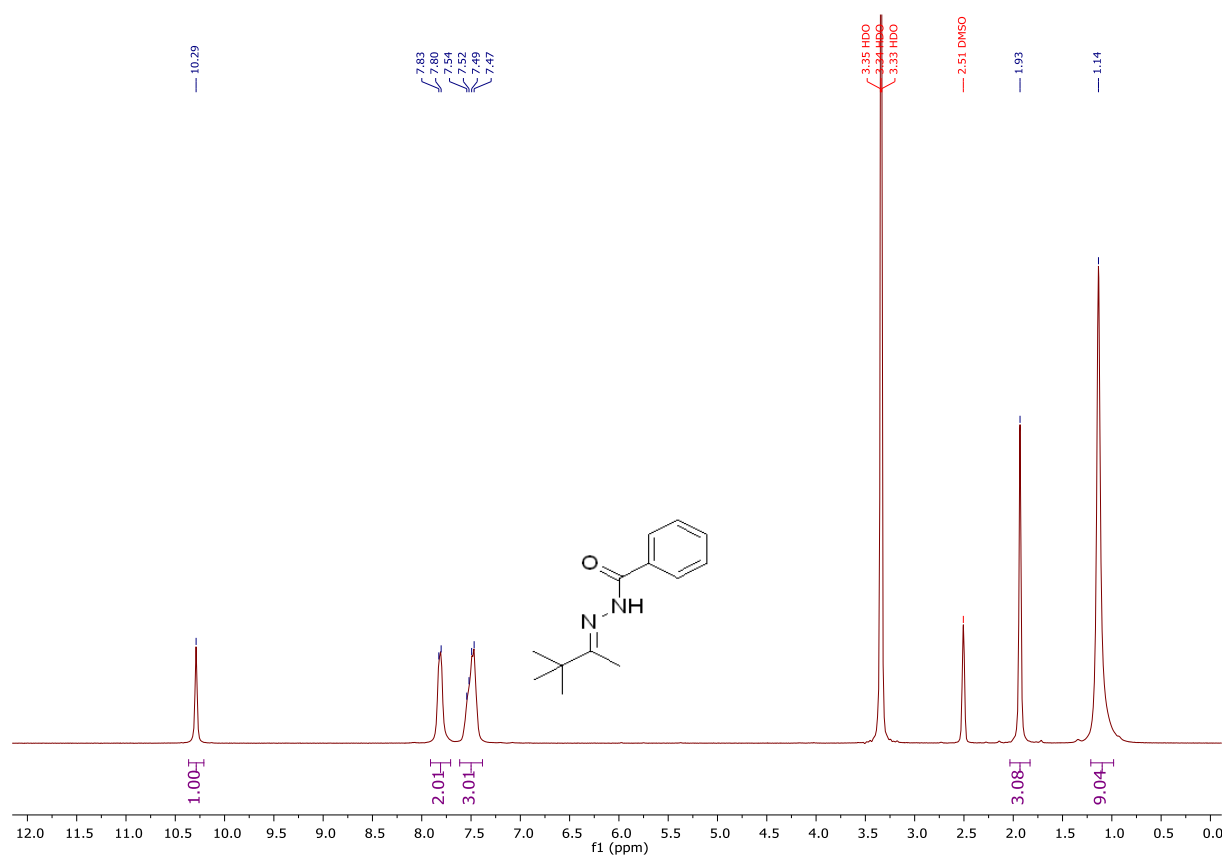

Figure S12: <sup>1</sup>H NMR of *N'*-(3,3-dimethylbutan-2-ylidene)benzohydrazide (6c) in DMSO-*d*<sub>6</sub>.

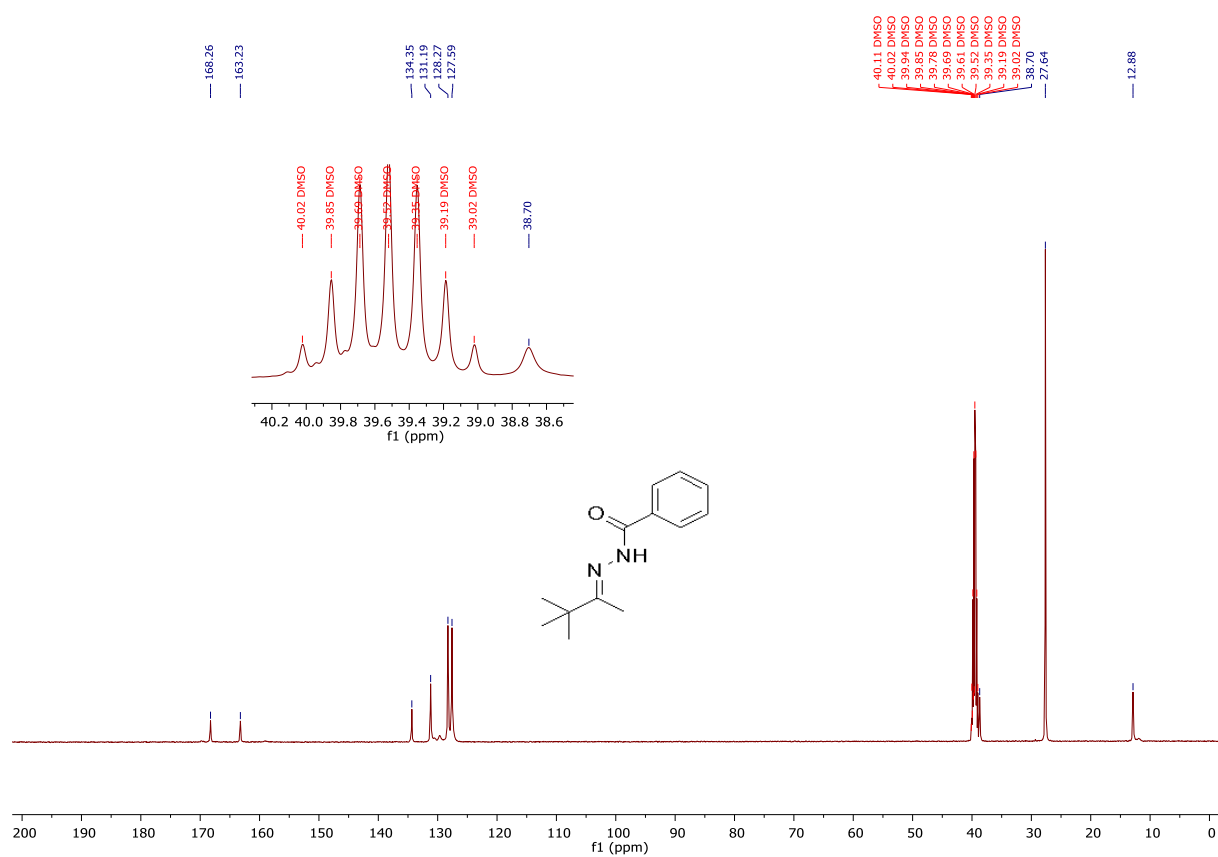

Figure S13: <sup>13</sup>C NMR of *N'*-(3,3-dimethylbutan-2-ylidene)benzohydrazide (6c) in DMSO-*d*<sub>6</sub>.

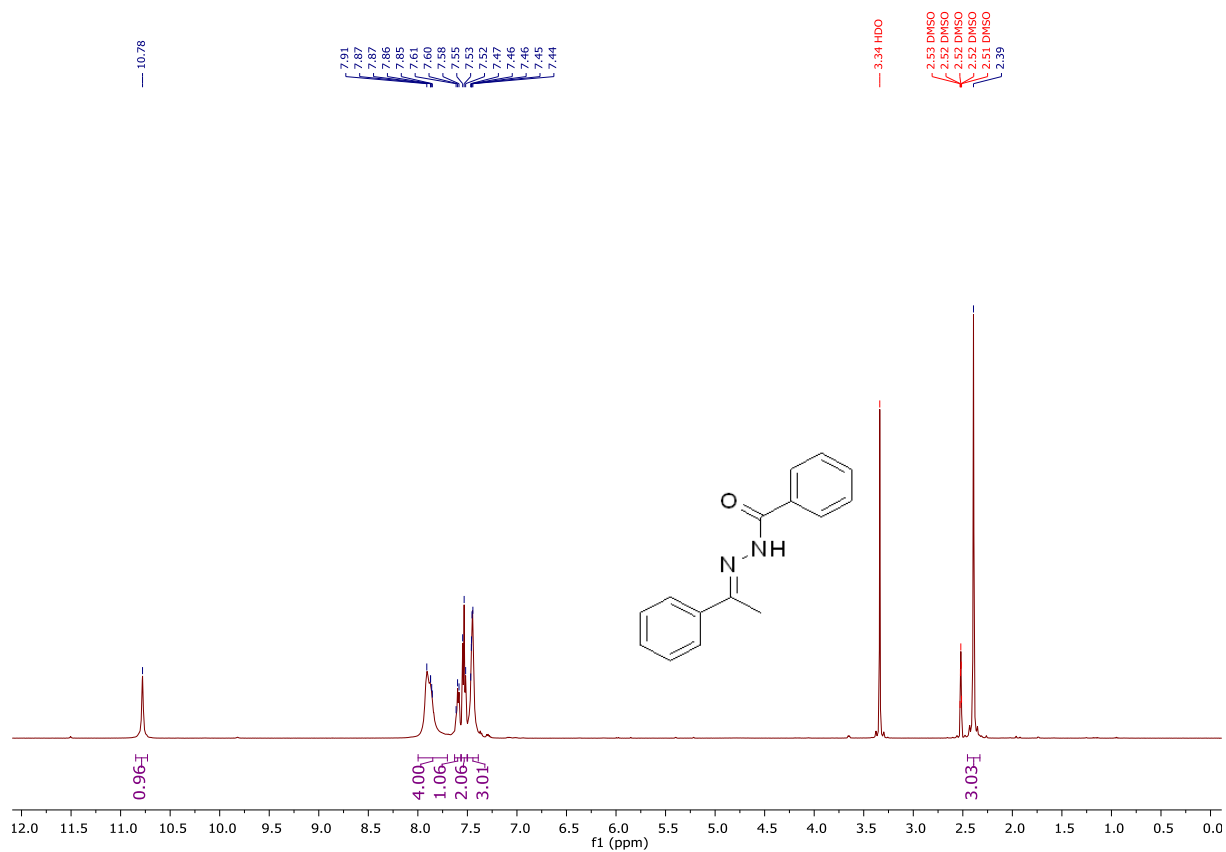

Figure S14: <sup>1</sup>H NMR of *N'*-(1-phenylethylidene)benzohydrazide (6d) in DMSO-*d*<sub>6</sub>.

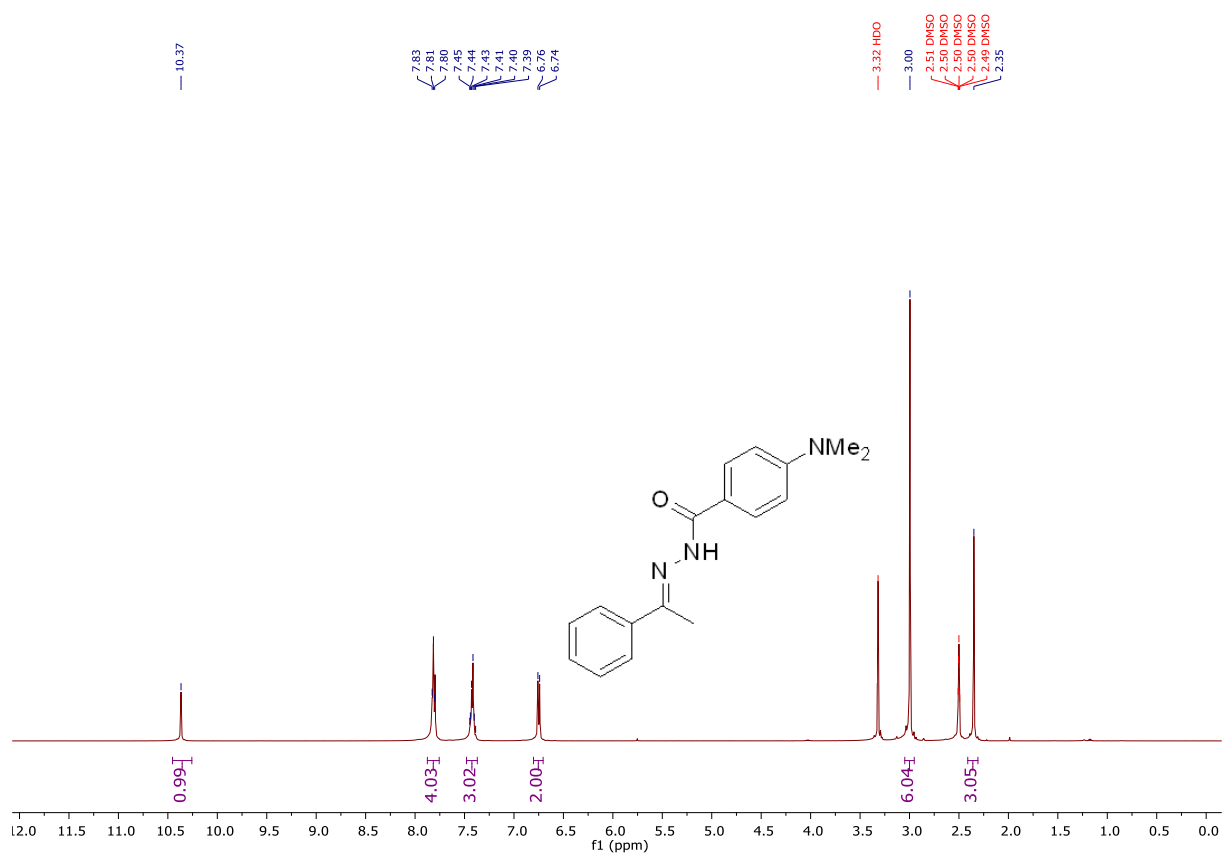

Figure S15: <sup>1</sup>H NMR of 4-(dimethylamino)-*N'*-(1-phenylethylidene)benzohydrazide (6e) in DMSO-*d*<sub>6</sub>.

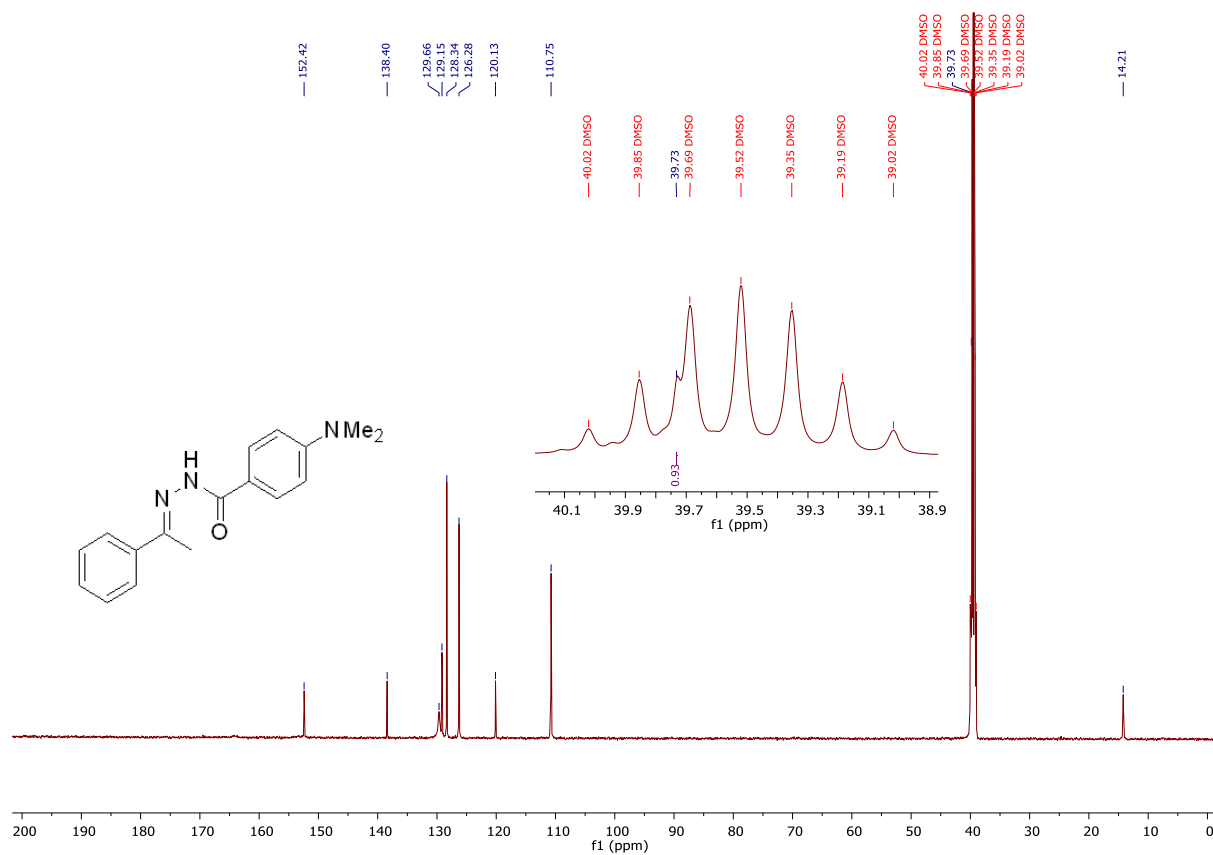

Figure S16: <sup>13</sup>C NMR of 4-(dimethylamino)-*N'*-(1-phenylethylidene)benzohydrazide (6e) in DMSO-*d*<sub>6</sub>.

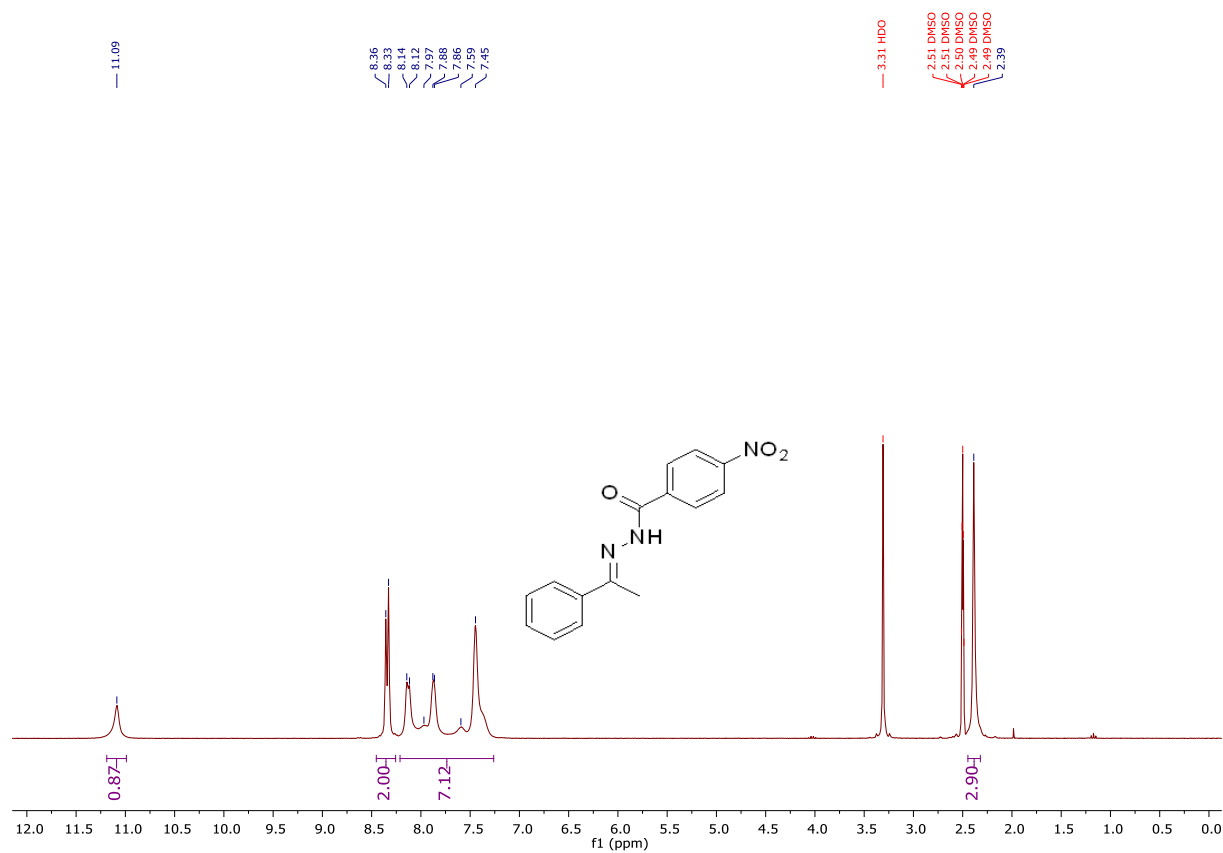

Figure S17: <sup>1</sup>H NMR of 4-nitro-*N'*-(1-phenylethylidene)benzohydrazide (6f) in DMSO-*d*<sub>6</sub>.

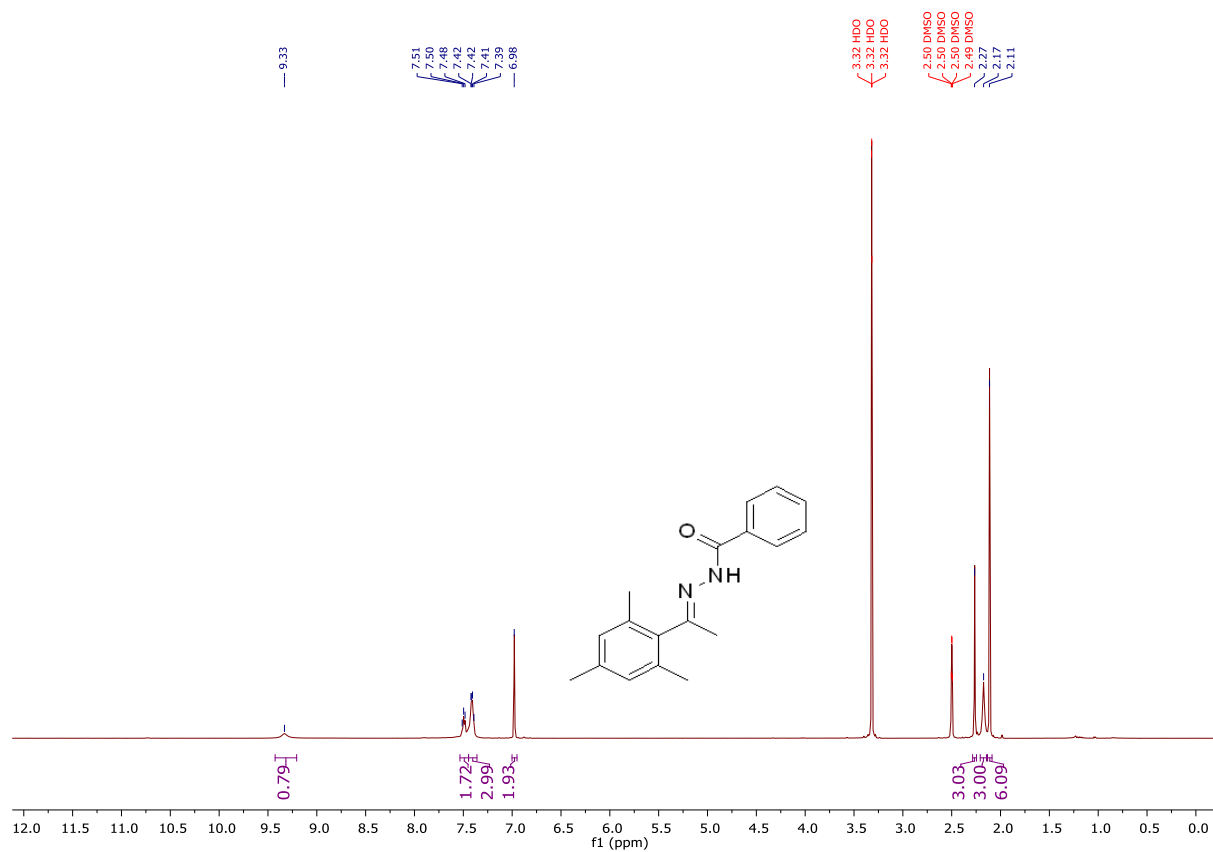

Figure S18: <sup>1</sup>H NMR of *N'*-(1-mesitylethylidene)benzohydrazide (6g) in DMSO-*d*<sub>6</sub>.

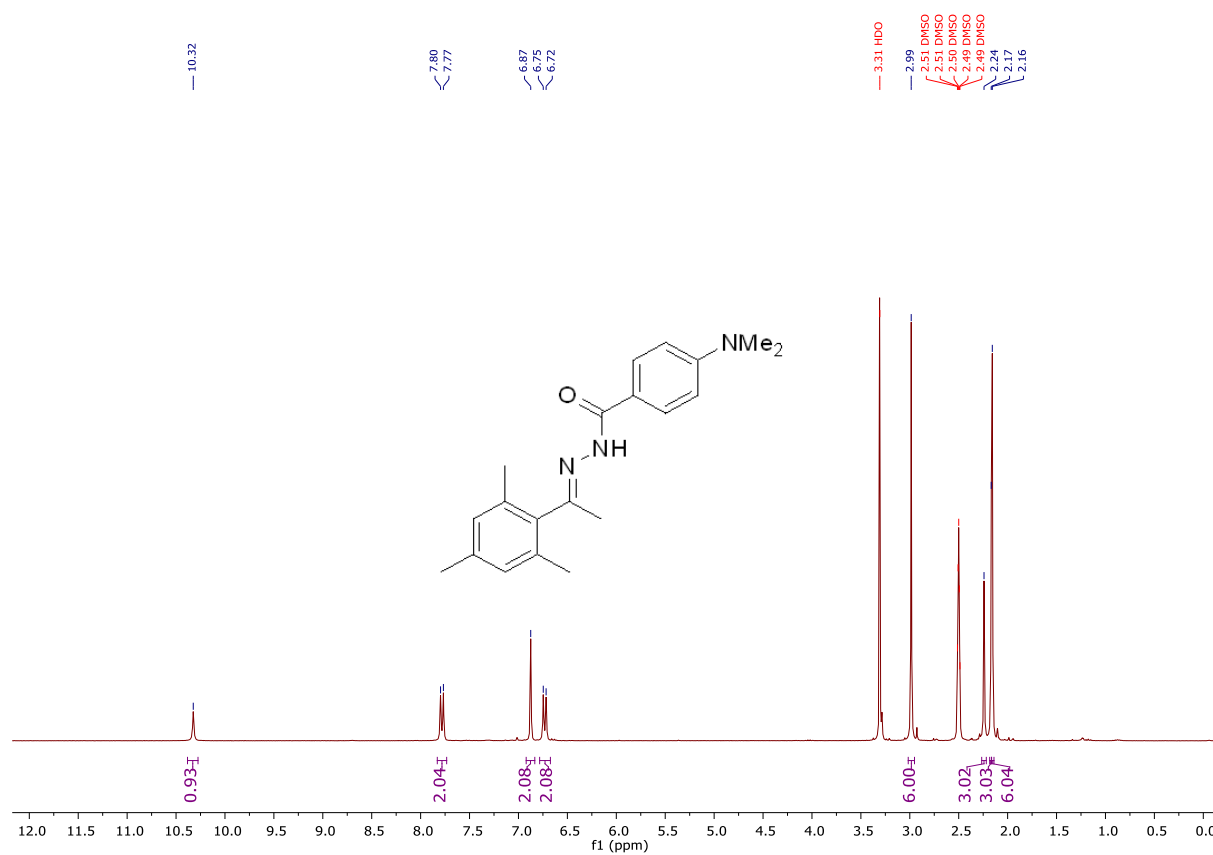

Figure S19: <sup>1</sup>H NMR of 4-(dimethylamino)-*N'*-(1-mesitylethylidene)benzohydrazide (6h) in DMSO-*d*<sub>6</sub>.



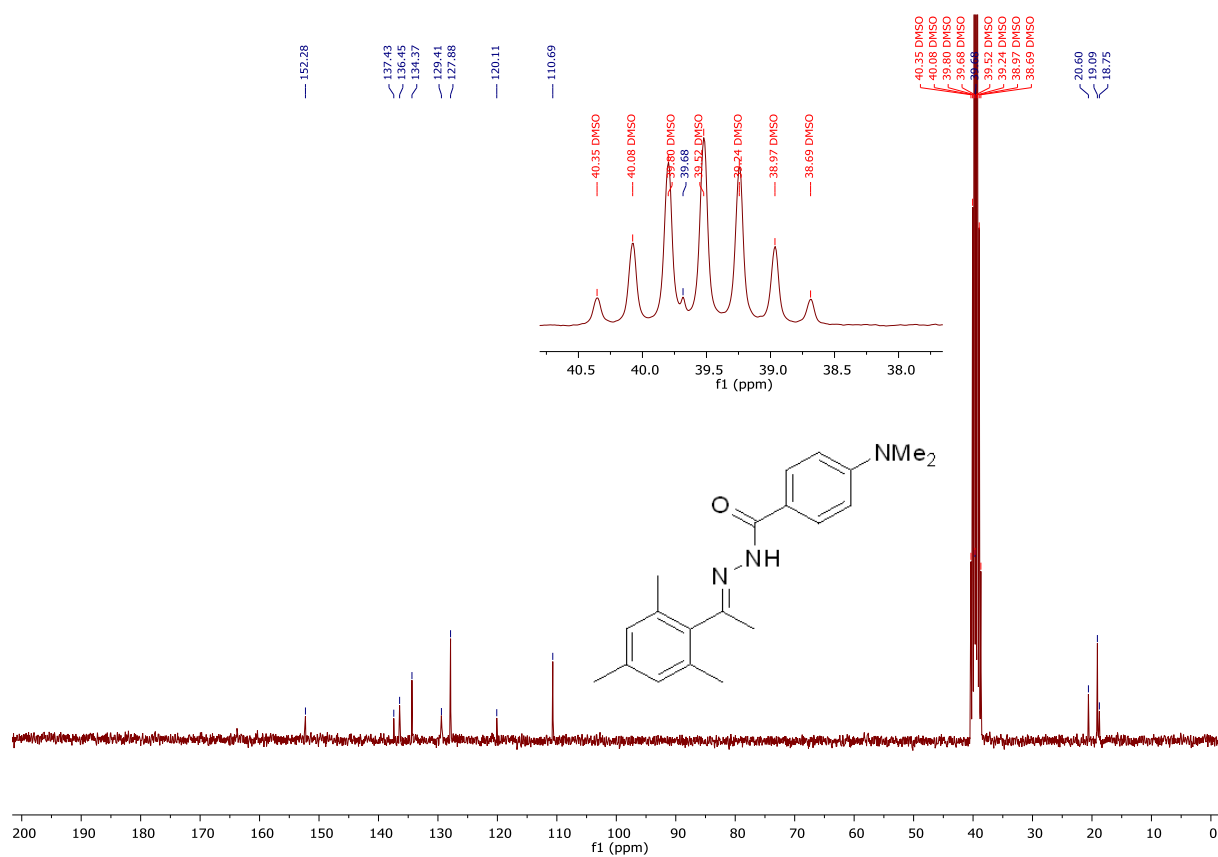

Figure S20: <sup>13</sup>C NMR of 4-(dimethylamino)-N'-(1-mesitylethylidene)benzohydrazide (6h) in DMSO-*d*<sub>6</sub>.

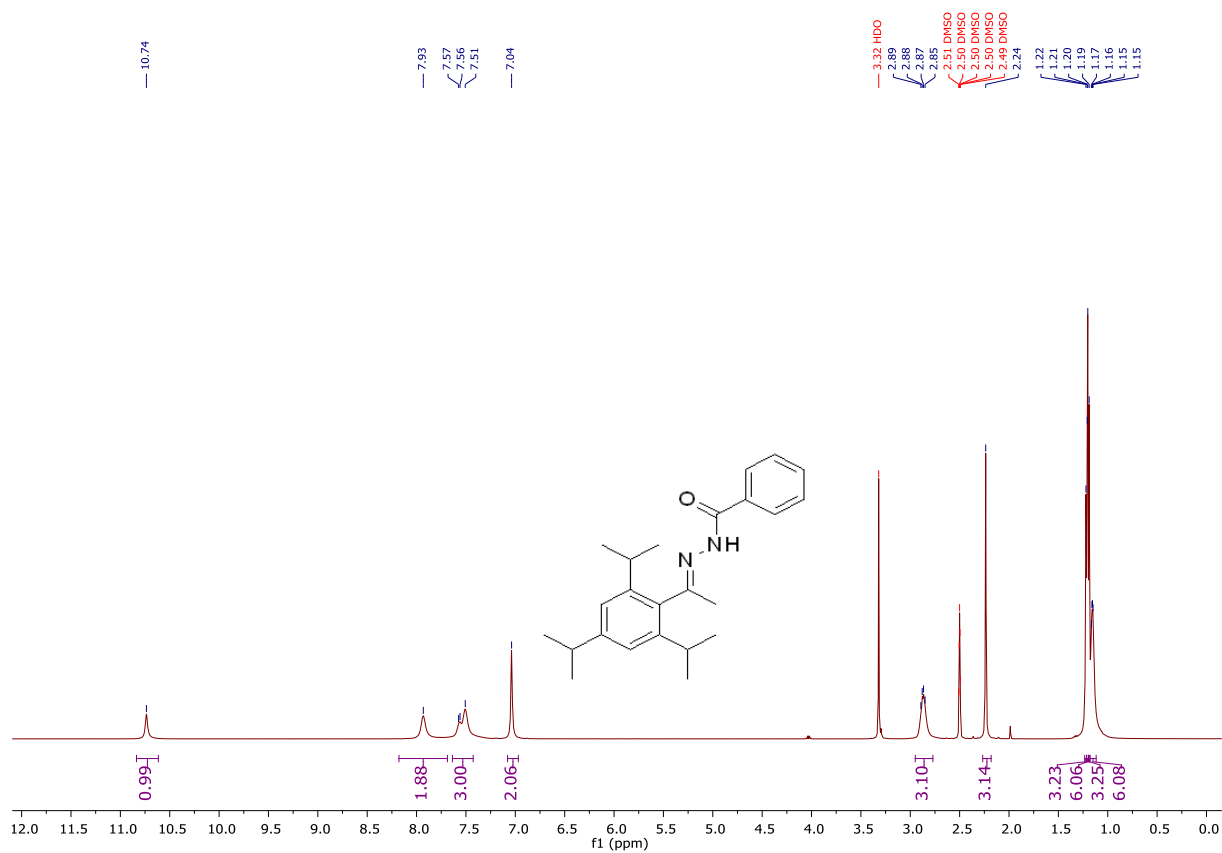

Figure S21: <sup>1</sup>H NMR of N'-(1-(2,4,6-triisopropylphenyl)ethylidene)benzohydrazide (6i) in DMSO-*d*<sub>6</sub>.

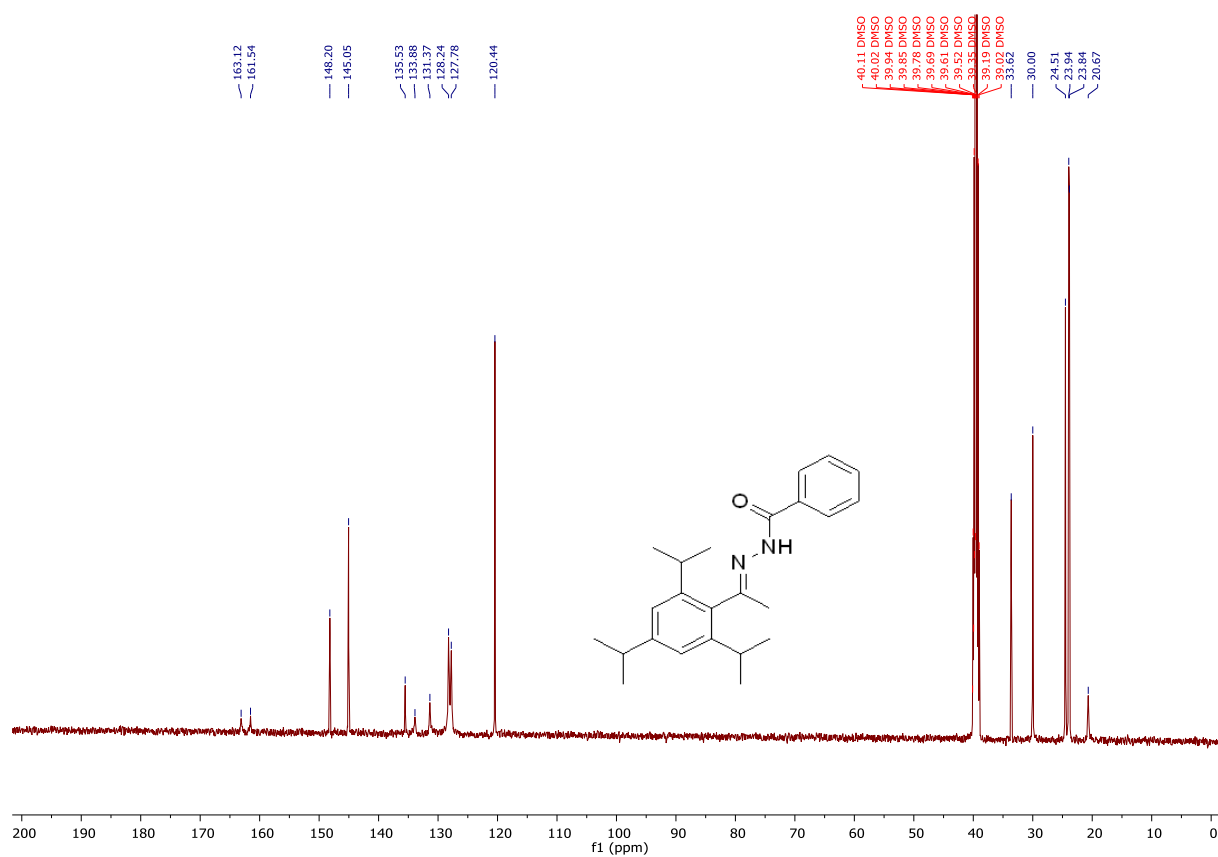

Figure S22: <sup>13</sup>C NMR of *N'*-(1-(2,4,6-triisopropylphenyl)ethylidene)benzohydrazide (6i) in DMSO-*d*<sub>6</sub>.

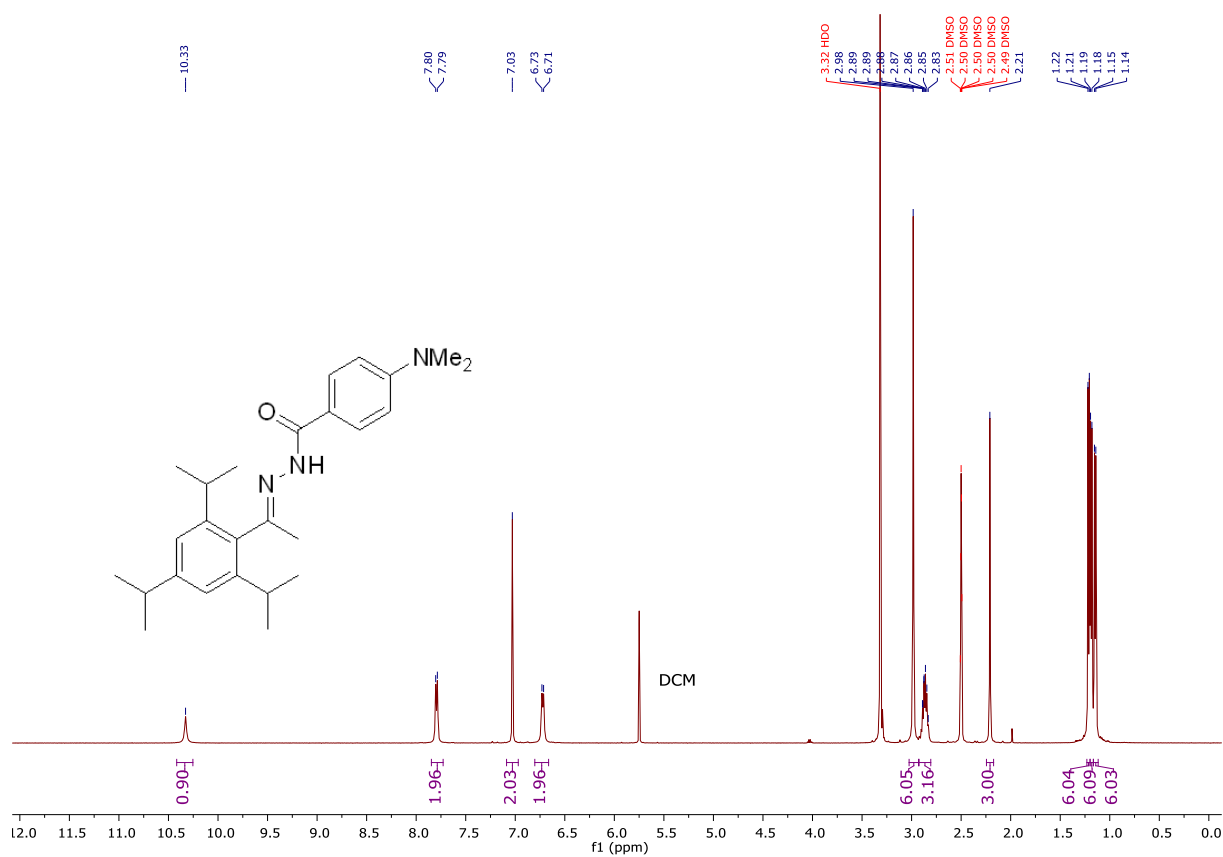

Figure S23: <sup>1</sup>H NMR of 4-(dimethylamino)-*N'*-(1-(2,4,6-triisopropylphenyl)ethylidene)benzohydrazide (6j) in DMSO-*d*<sub>6</sub>.

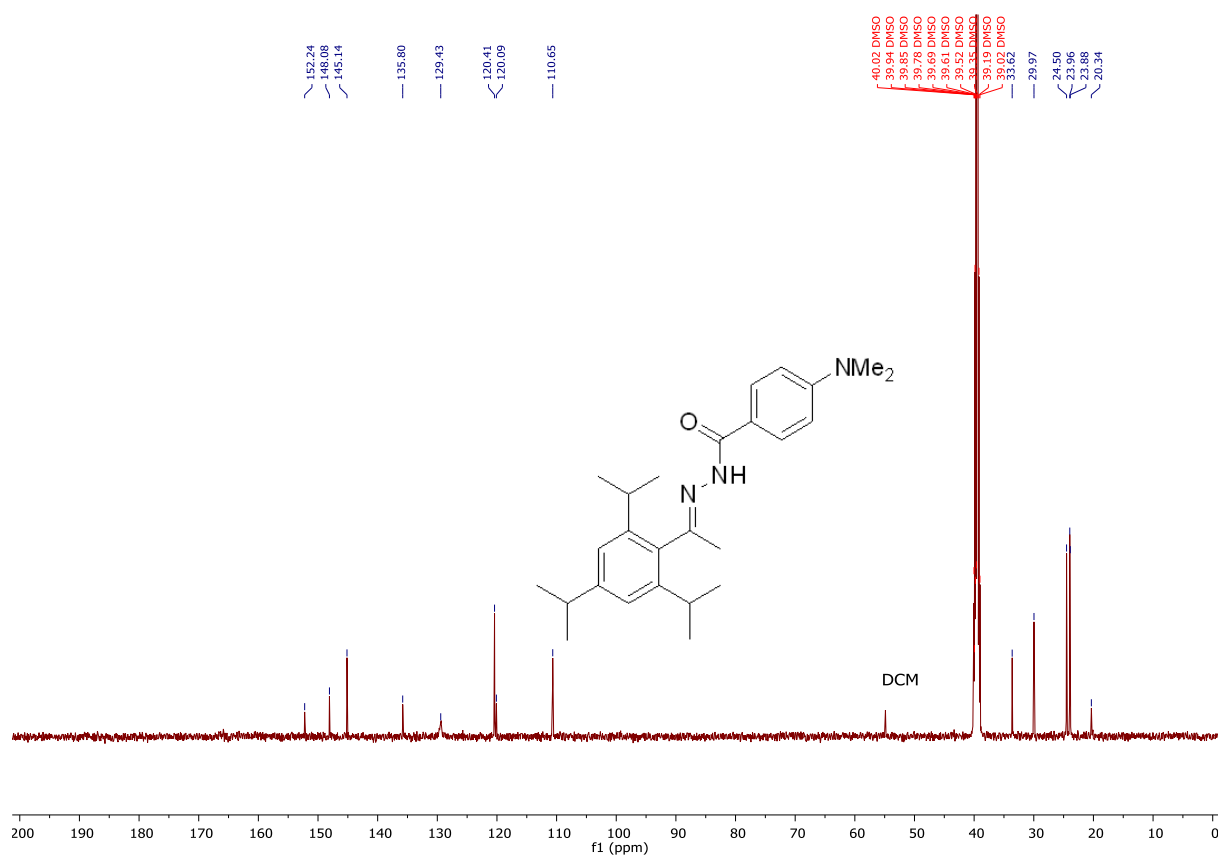

Figure S24: <sup>13</sup>C NMR of 4-(dimethylamino)-*N'*-(1-(2,4,6-triisopropylphenyl)ethylidene)benzohydrazide (6j) in DMSO-*d*<sub>6</sub>.

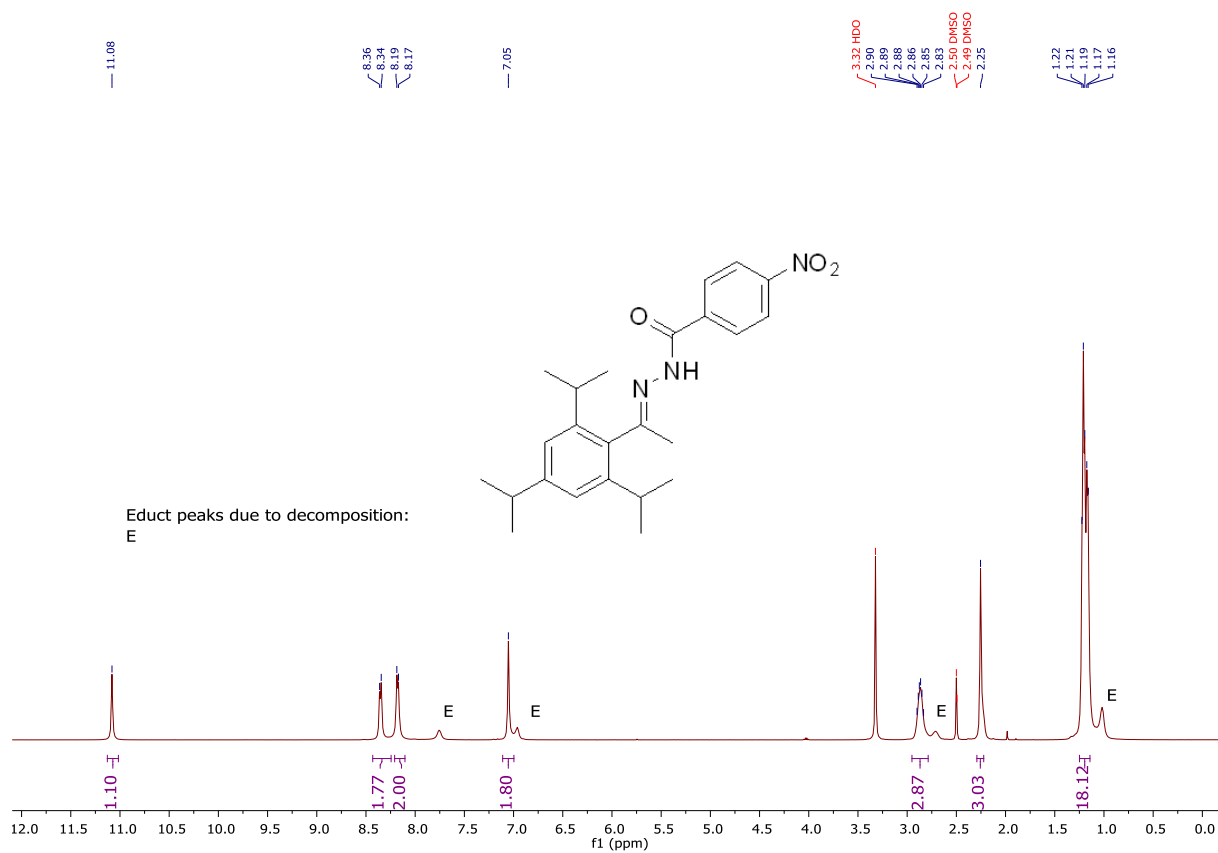

Figure S25: <sup>1</sup>H NMR of 4-nitro-*N'*-(1-(2,4,6-triisopropylphenyl)ethylidene)benzohydrazide (6k) in DMSO-*d*<sub>6</sub>.

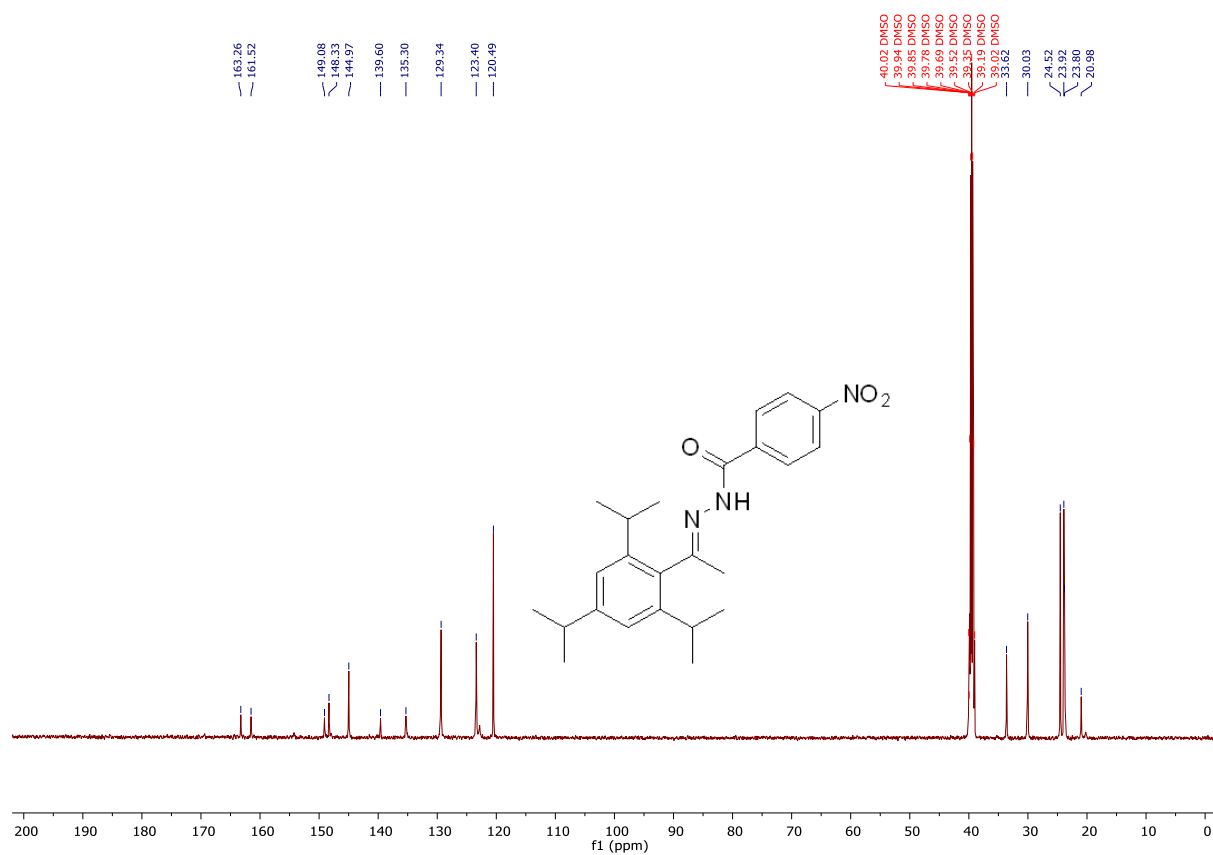

Figure S26: <sup>13</sup>C NMR of 4-nitro-*N'*-(1-(2,4,6-triisopropylphenyl)ethylidene)benzohydrazide in (6k) DMSO-*d*<sub>6</sub>.

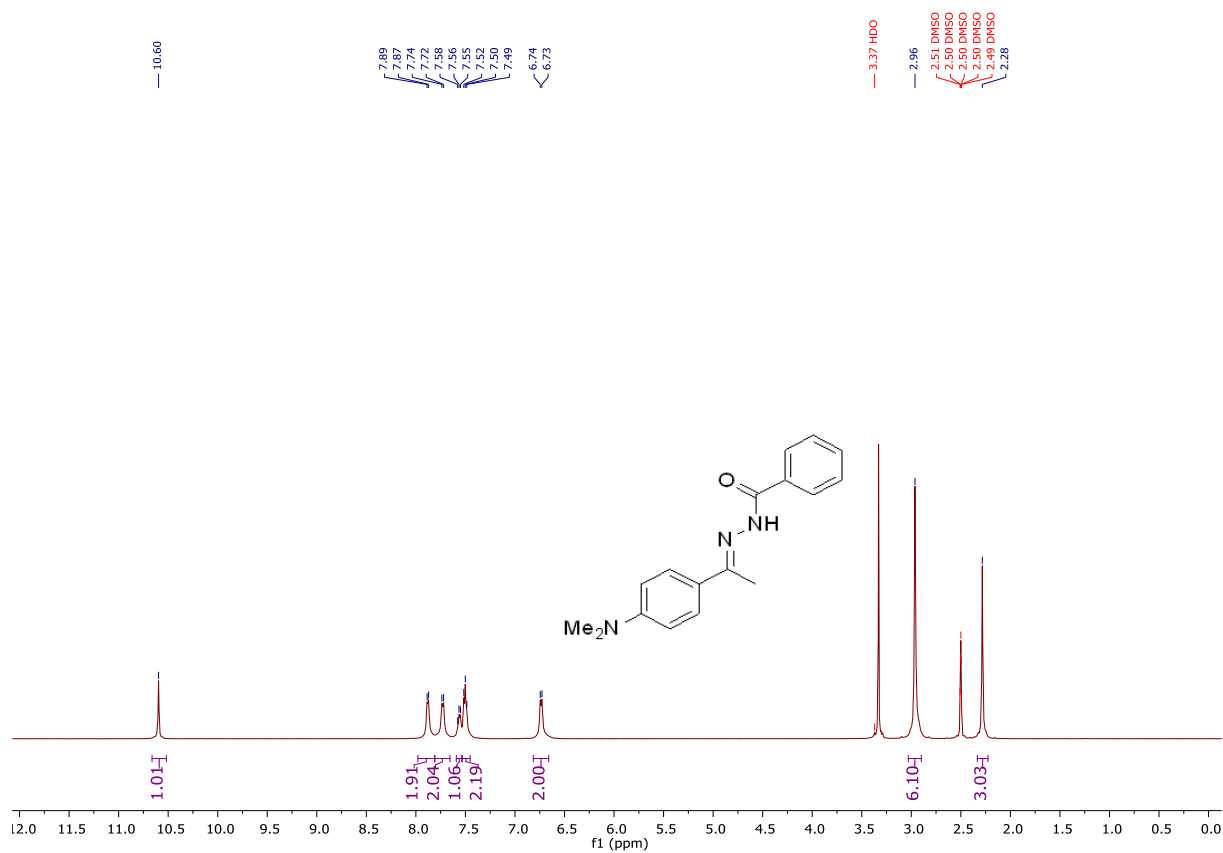

Figure S27: <sup>1</sup>H NMR of *N'*-(1-(4-(dimethylamino)phenyl)ethylidene)benzohydrazide (6l) in DMSO-*d*<sub>6</sub>.

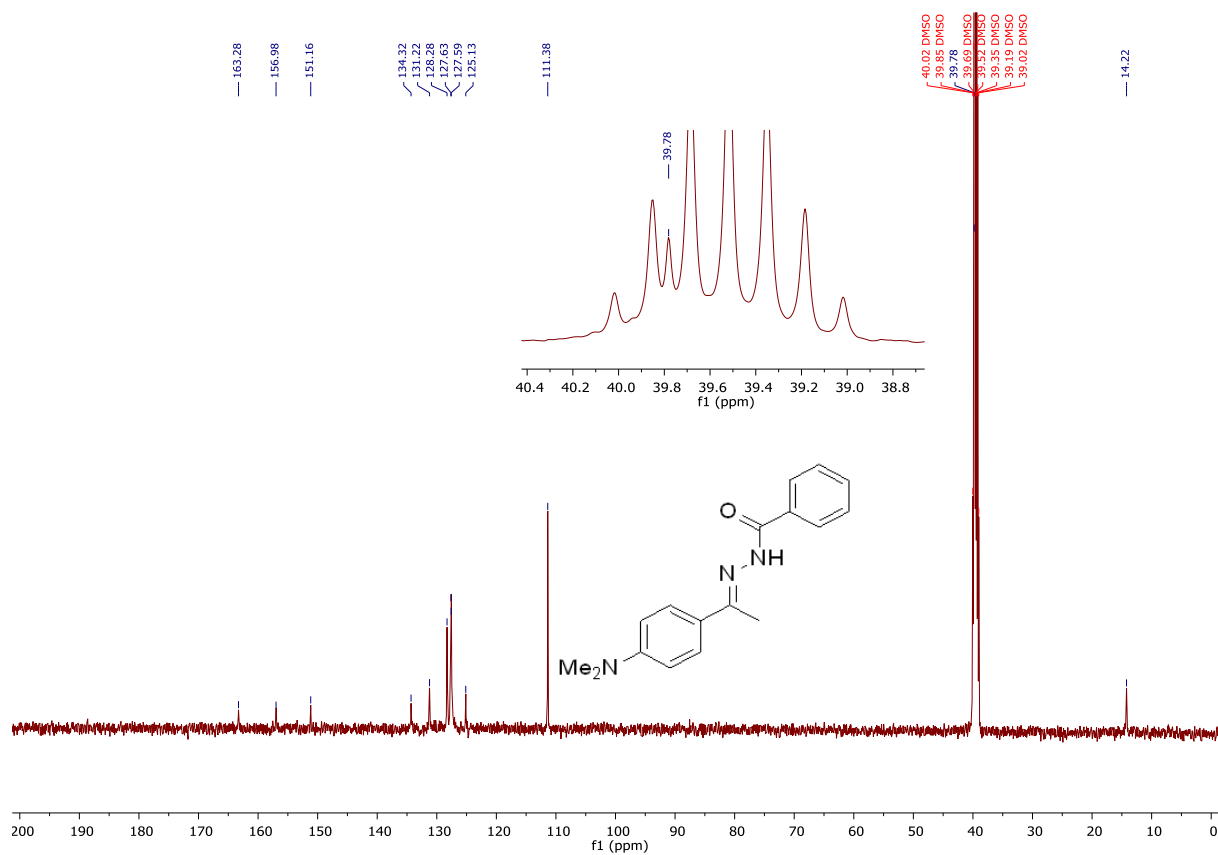

Figure S28: <sup>13</sup>C NMR of *N'*-(1-(4-(dimethylamino)phenyl)ethylidene)benzohydrazide (6l) in DMSO-*d*<sub>6</sub>.

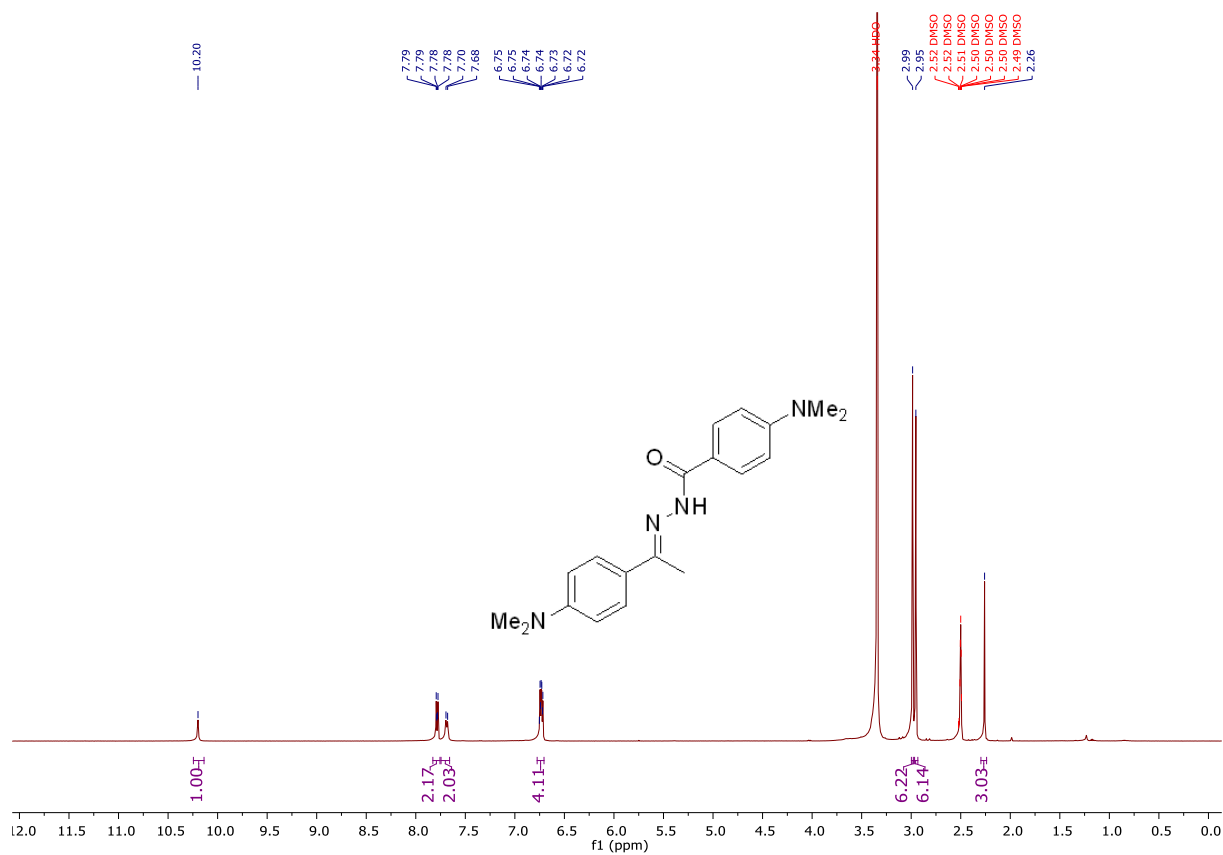

Figure S29: <sup>1</sup>H NMR of 4-(dimethylamino)-*N'*-(1-(4-(dimethylamino)phenyl)ethylidene)benzohydrazide (6m) in DMSO-*d*<sub>6</sub>.

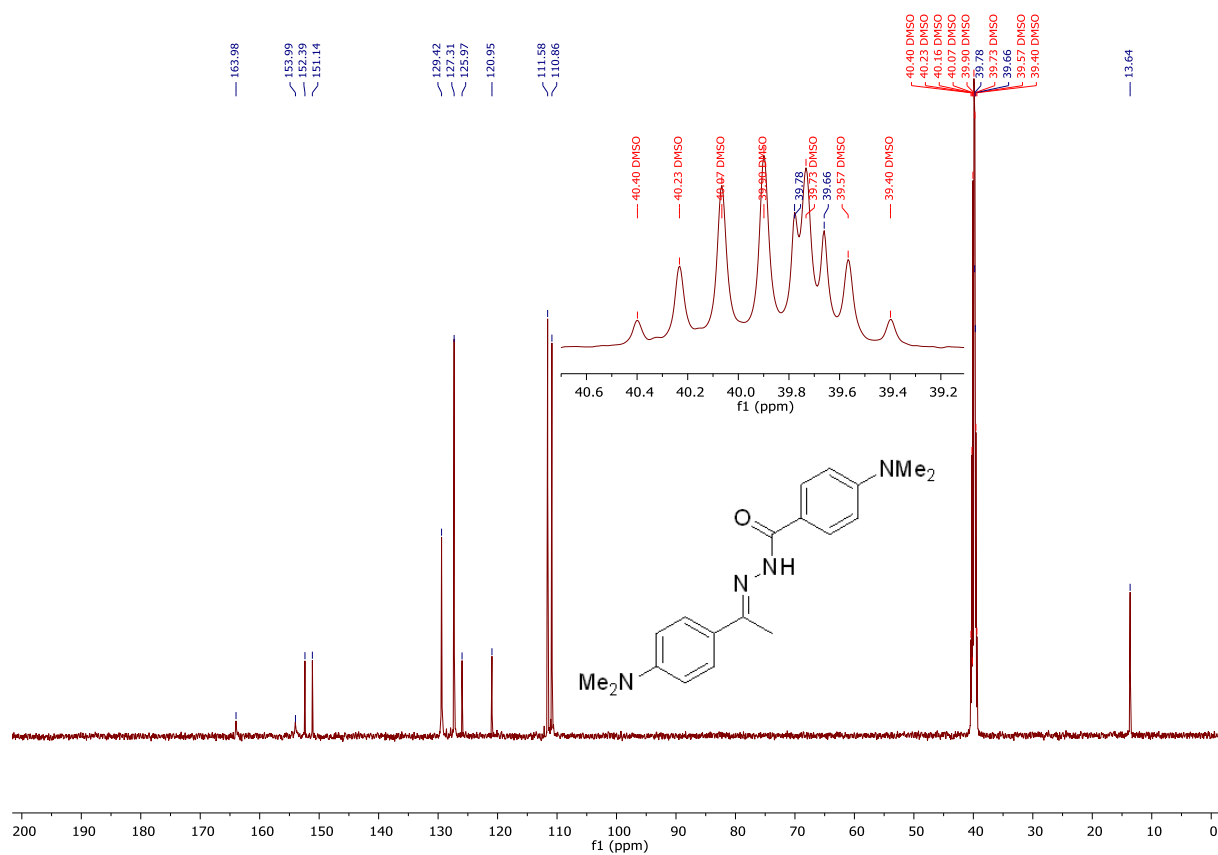

Figure S30: <sup>13</sup>C NMR of 4-(dimethylamino)-N'-(1-(4-(dimethylamino)phenyl)ethylidene)benzohydrazide (6m) in DMSO-*d*<sub>6</sub>.

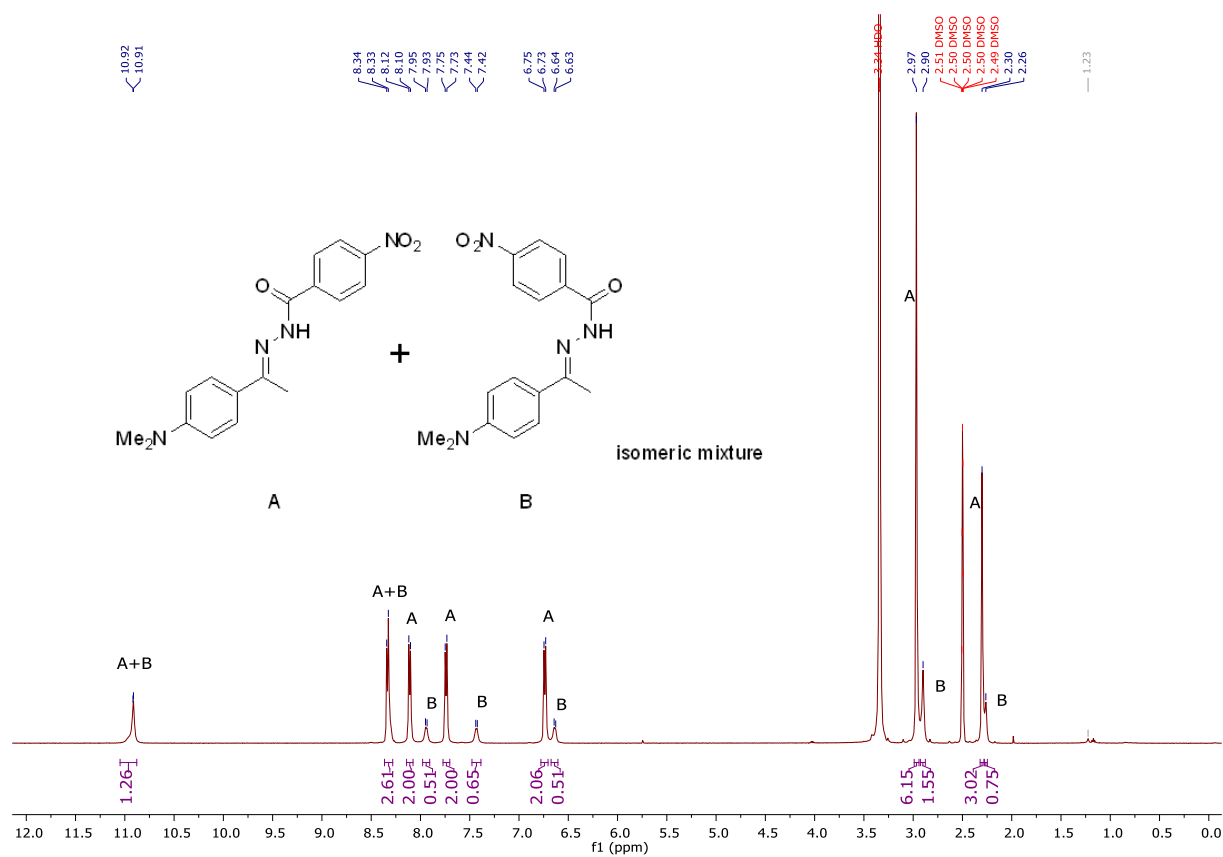

Figure S31: <sup>1</sup>H NMR of 4-nitro-N'-(1-(4-(dimethylamino)phenyl)ethylidene)benzohydrazide (6n) in DMSO-*d*<sub>6</sub>.

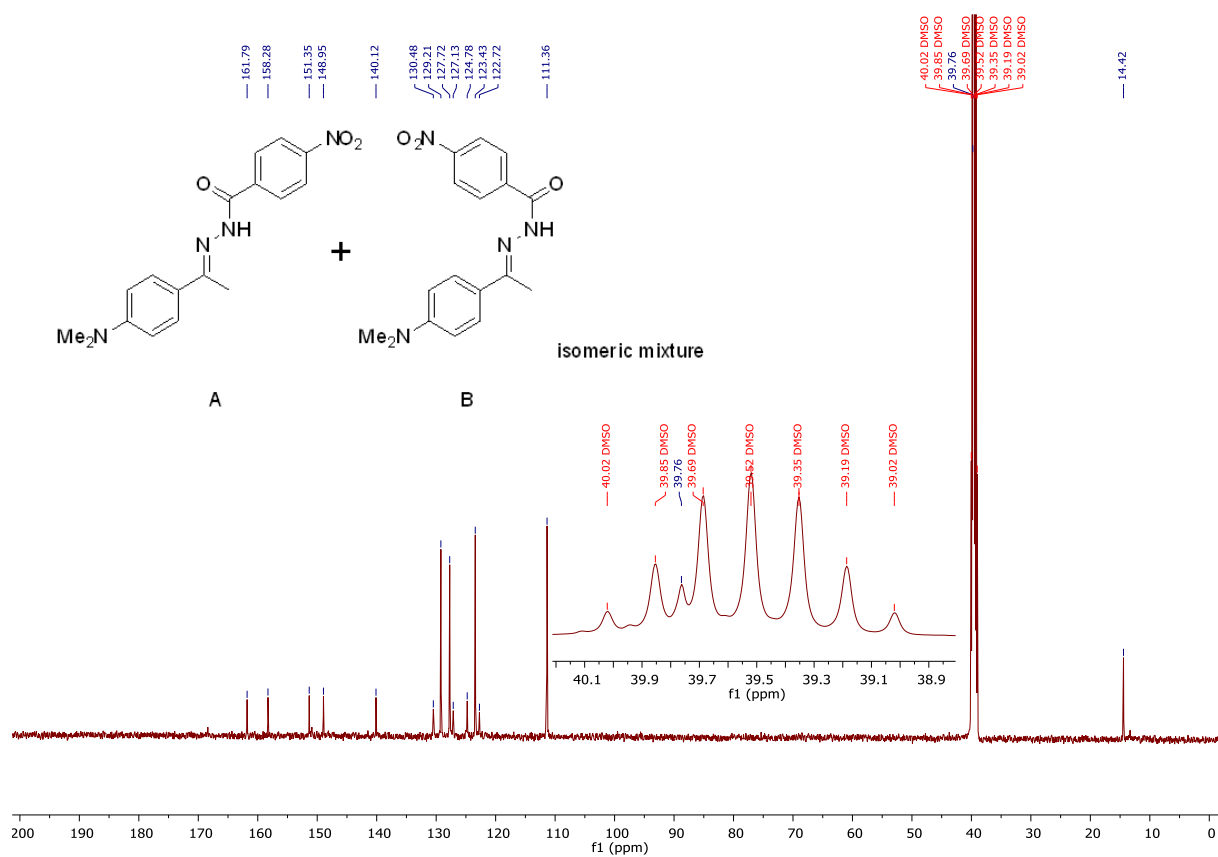

Figure S32: <sup>13</sup>C NMR of 4-nitro-*N'*-(1-(4-(dimethylamino)phenyl)ethylidene)benzohydrazide (6n) in DMSO-*d*<sub>6</sub>.

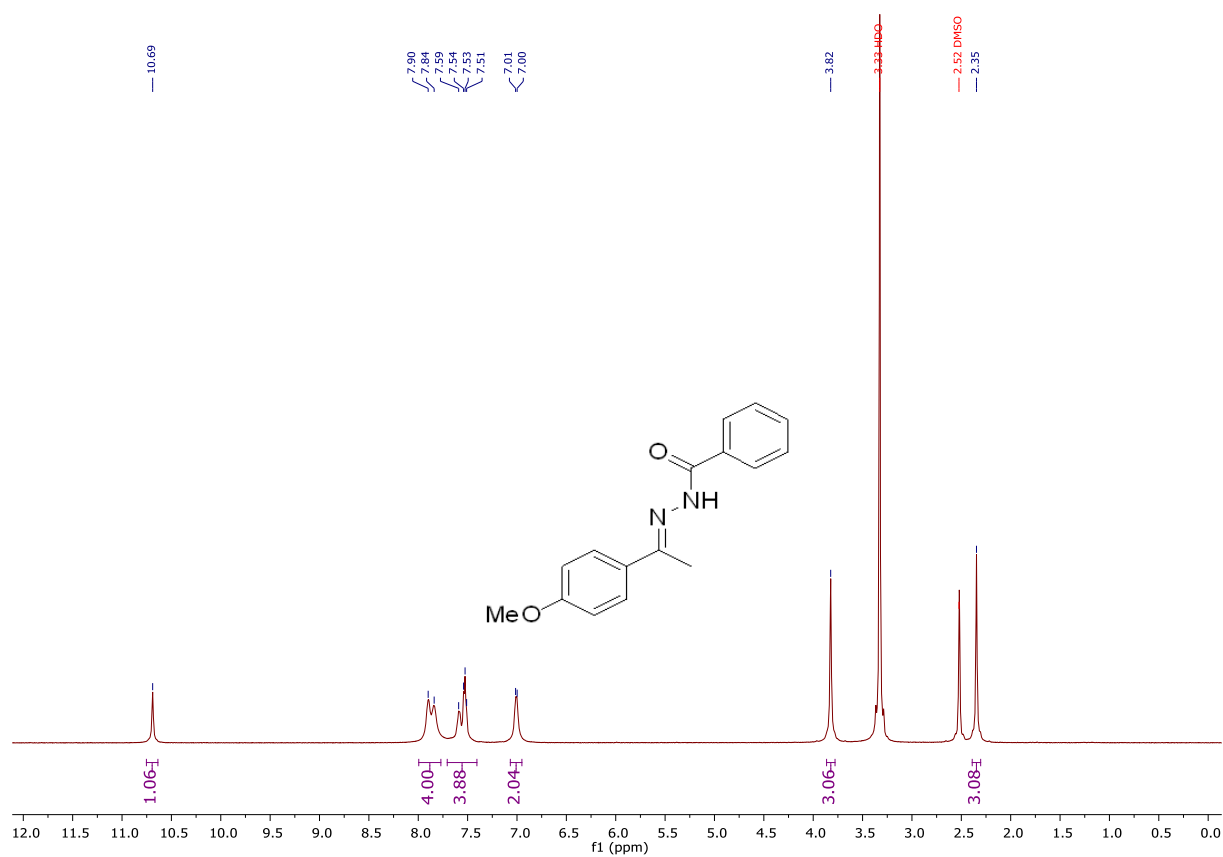

Figure S33: <sup>1</sup>H NMR of *N'*-(1-(4-methoxyphenyl)ethylidene)benzohydrazide (6o) in DMSO-*d*<sub>6</sub>.

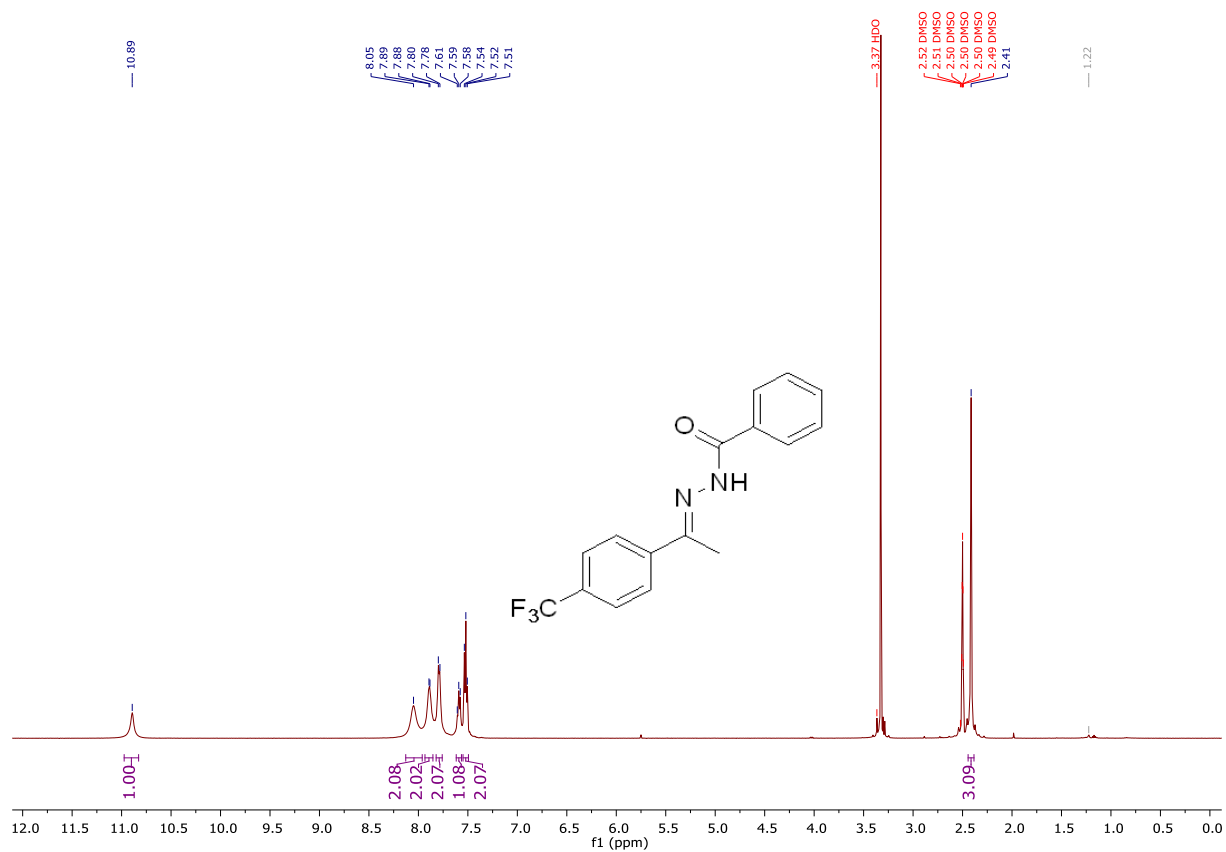

Figure S34: <sup>1</sup>H NMR of *N'*-(1-(4-(trifluoromethyl)phenyl)ethylidene)benzohydrazide (6p) in DMSO-*d*<sub>6</sub>.

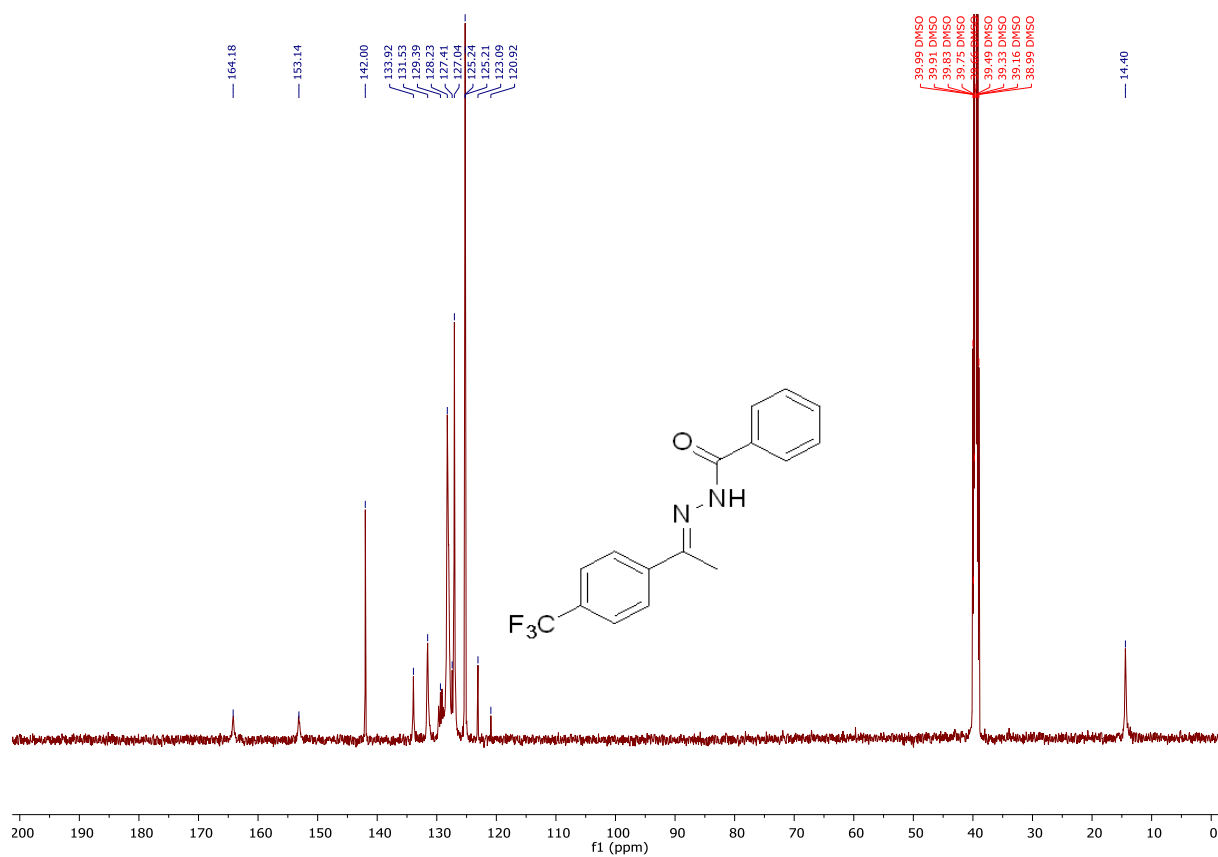

Figure S35: <sup>13</sup>C NMR of *N'*-(1-(4-(trifluoromethyl)phenyl)ethylidene)benzohydrazide (6p) in DMSO-*d*<sub>6</sub>.



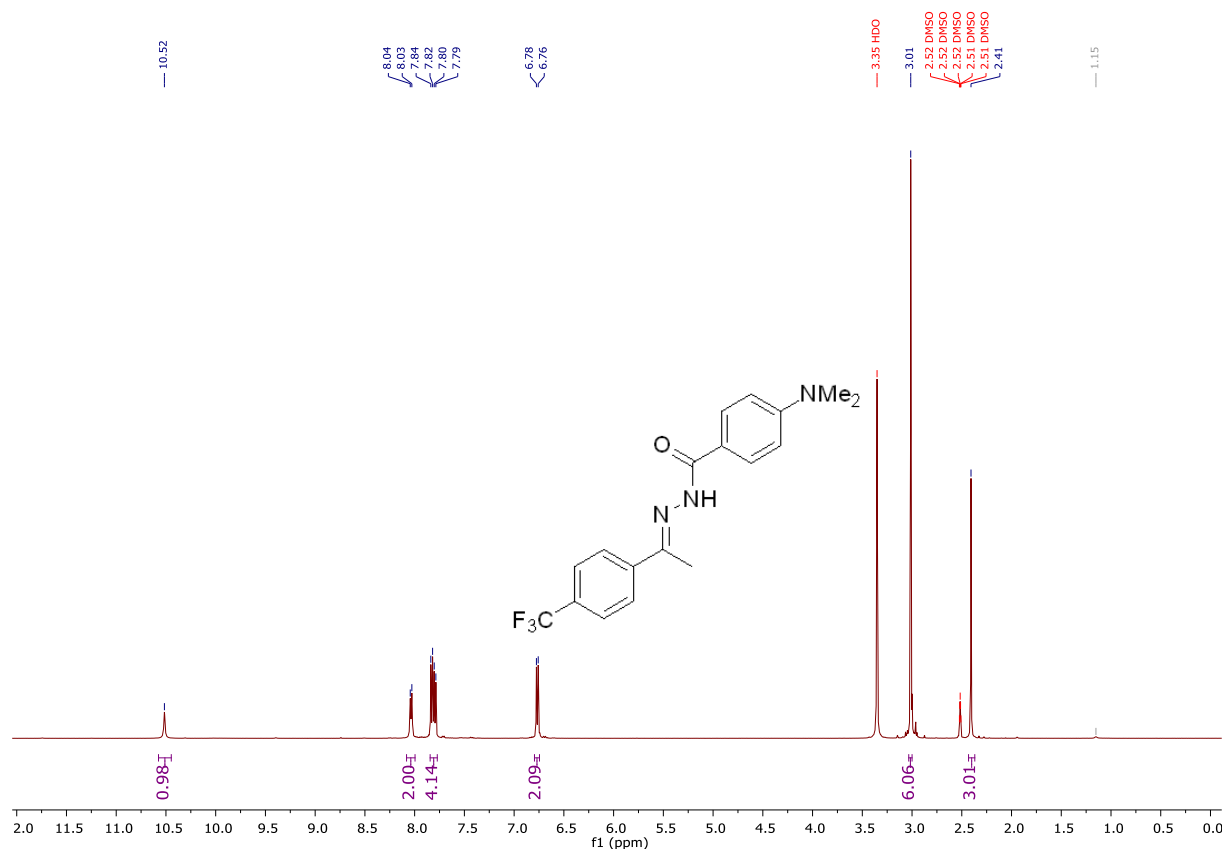

Figure S36: <sup>1</sup>H NMR of 4-(dimethylamino)-N'-(1-(4-(trifluoromethyl)phenyl)ethylidene)benzohydrazide (6q) in DMSO-*d*<sub>6</sub>.

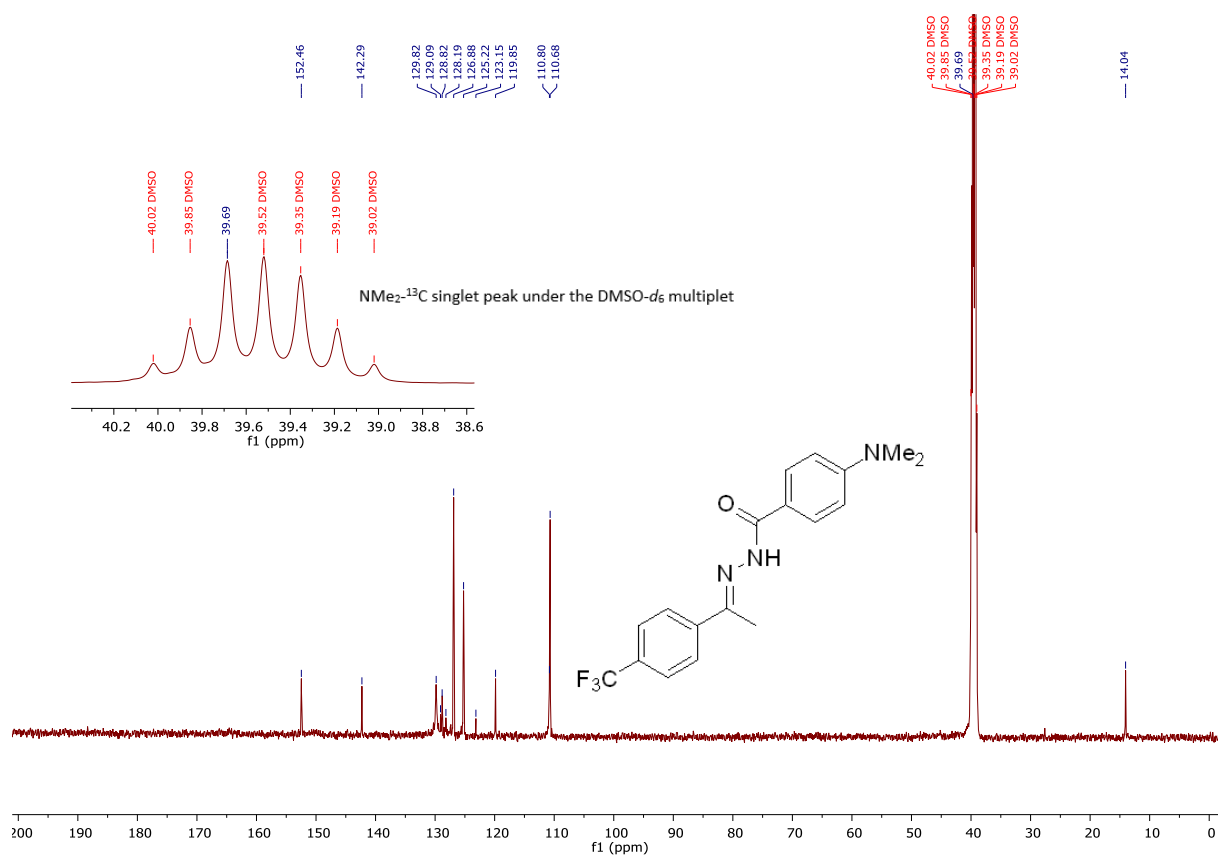

Figure S37: <sup>13</sup>C NMR of 4-(dimethylamino)-N'-(1-(4-(trifluoromethyl)phenyl)ethylidene)benzohydrazide (6q) in DMSO-*d*<sub>6</sub>.

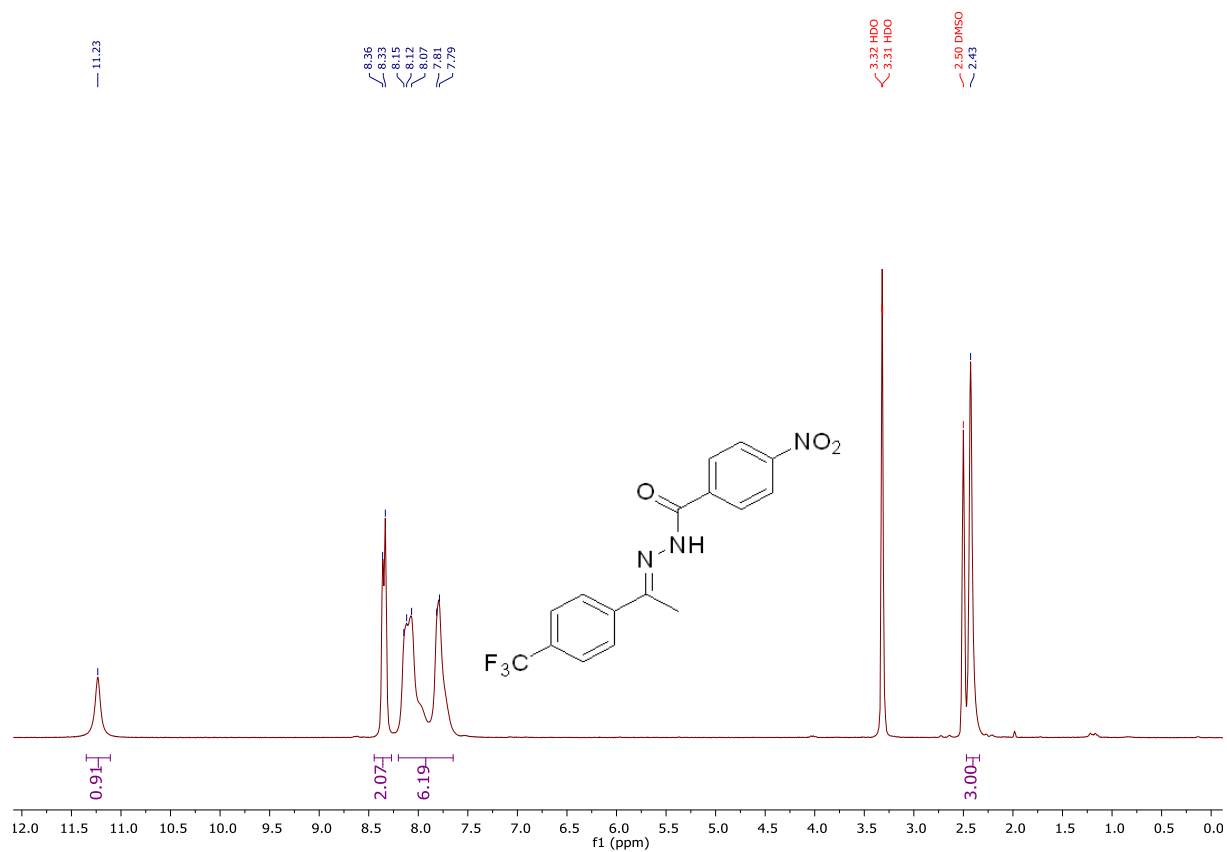

Figure S38: <sup>1</sup>H NMR of 4-nitro-*N'*-(1-(4-(trifluoromethyl)phenyl)ethylidene)benzohydrazide (6r) in DMSO-*d*<sub>6</sub>.

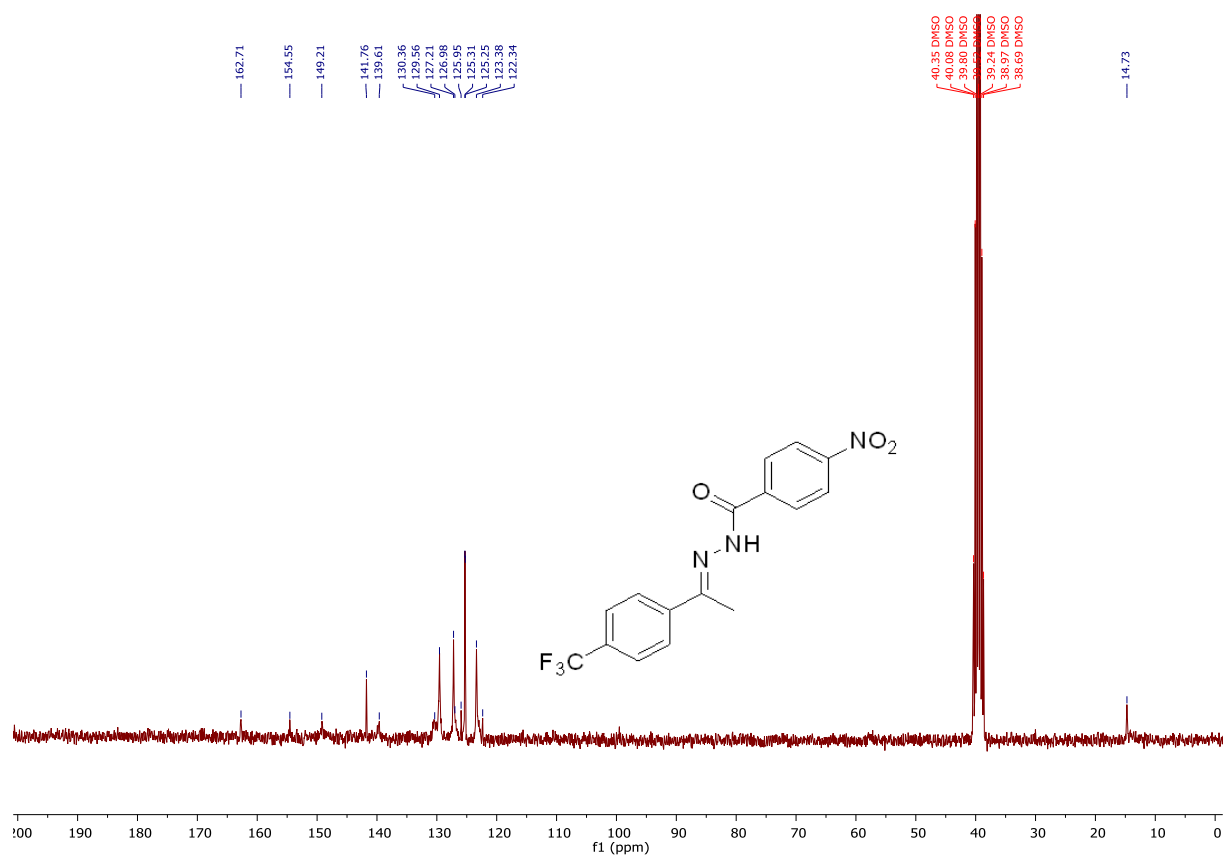

Figure S39: <sup>13</sup>C NMR of 4-nitro-*N'*-(1-(4-(trifluoromethyl)phenyl)ethylidene)benzohydrazide (6r) in DMSO-*d*<sub>6</sub>.

## 2.2.2. Internal alkynes as substrates

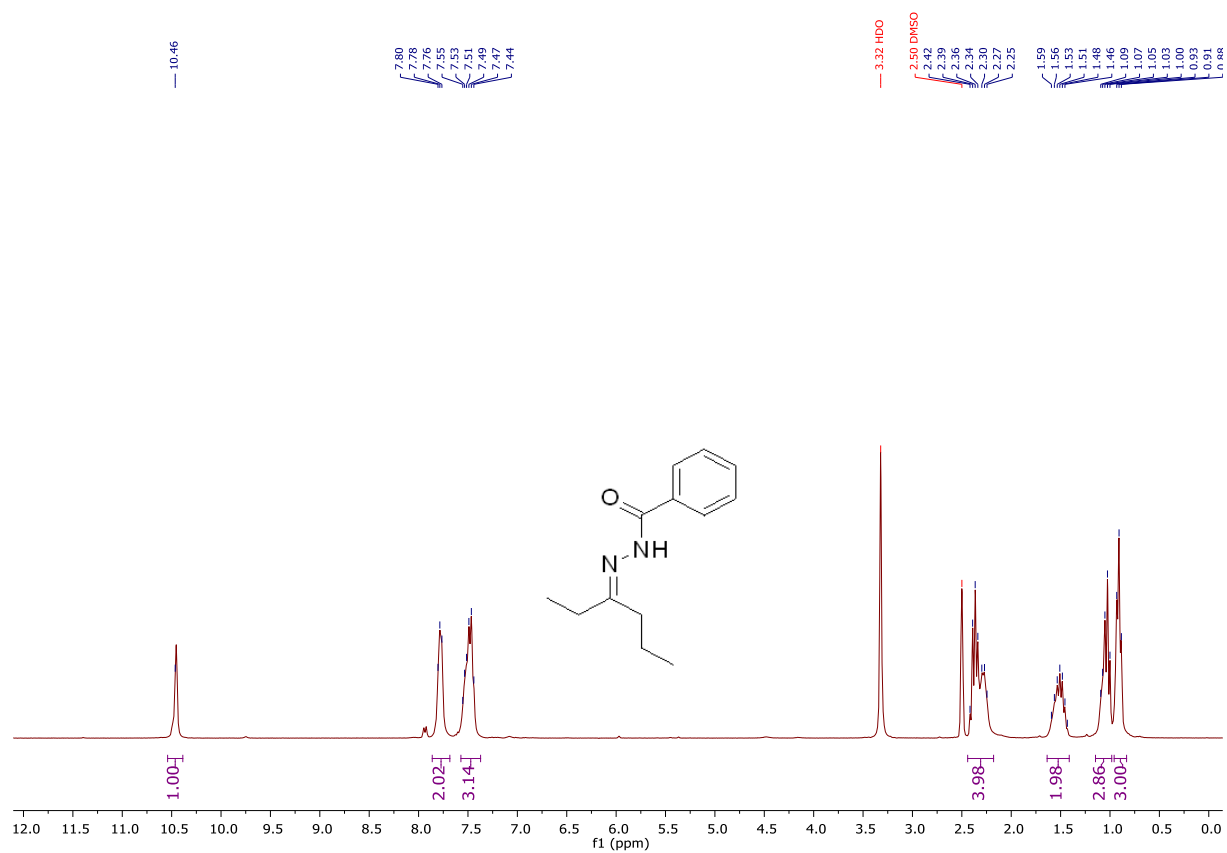

Figure S40: <sup>1</sup>H NMR of *N'*-(hexan-3-ylidene)benzohydrazide (7a) in DMSO-*d*<sub>6</sub>.

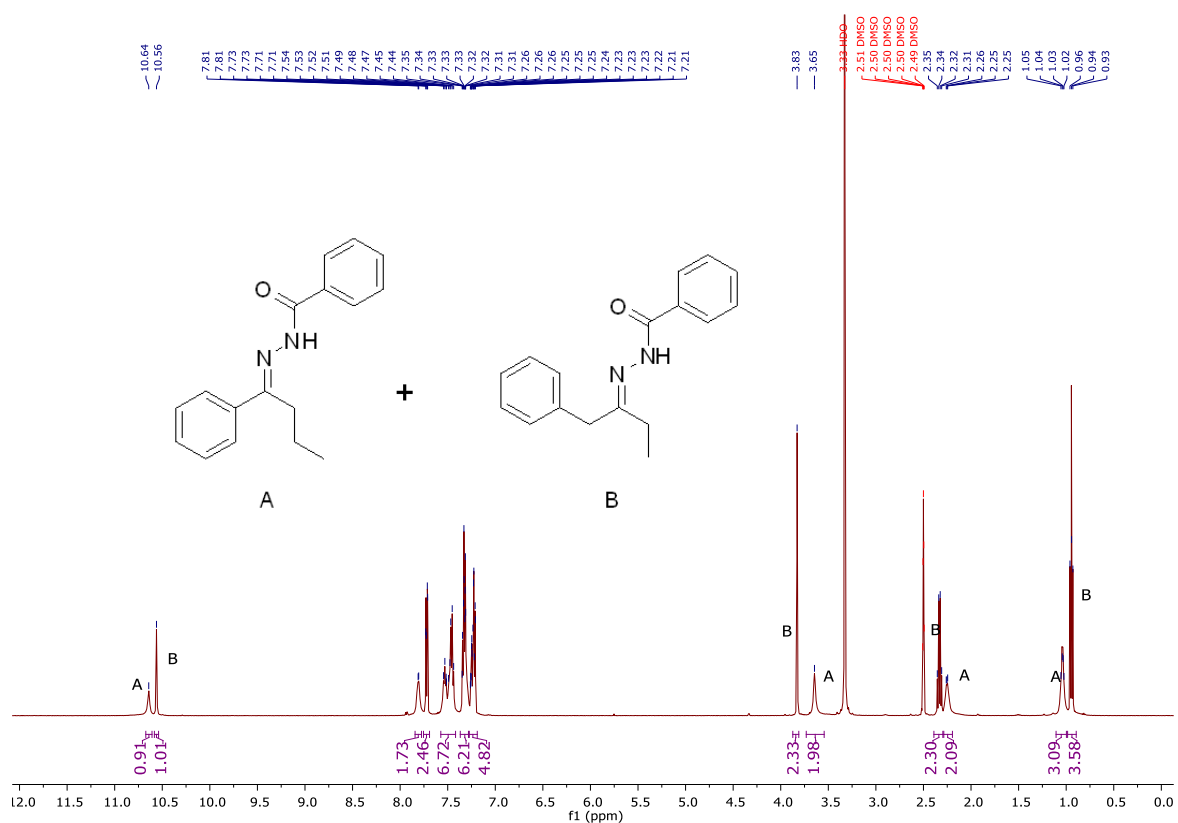

Figure S41: <sup>1</sup>H NMR of *N'*-(1-phenylbutylidene)benzohydrazide and *N'*-(1-phenylbutan-2-ylidene)benzohydrazide (7b) in DMSO-*d*<sub>6</sub>.

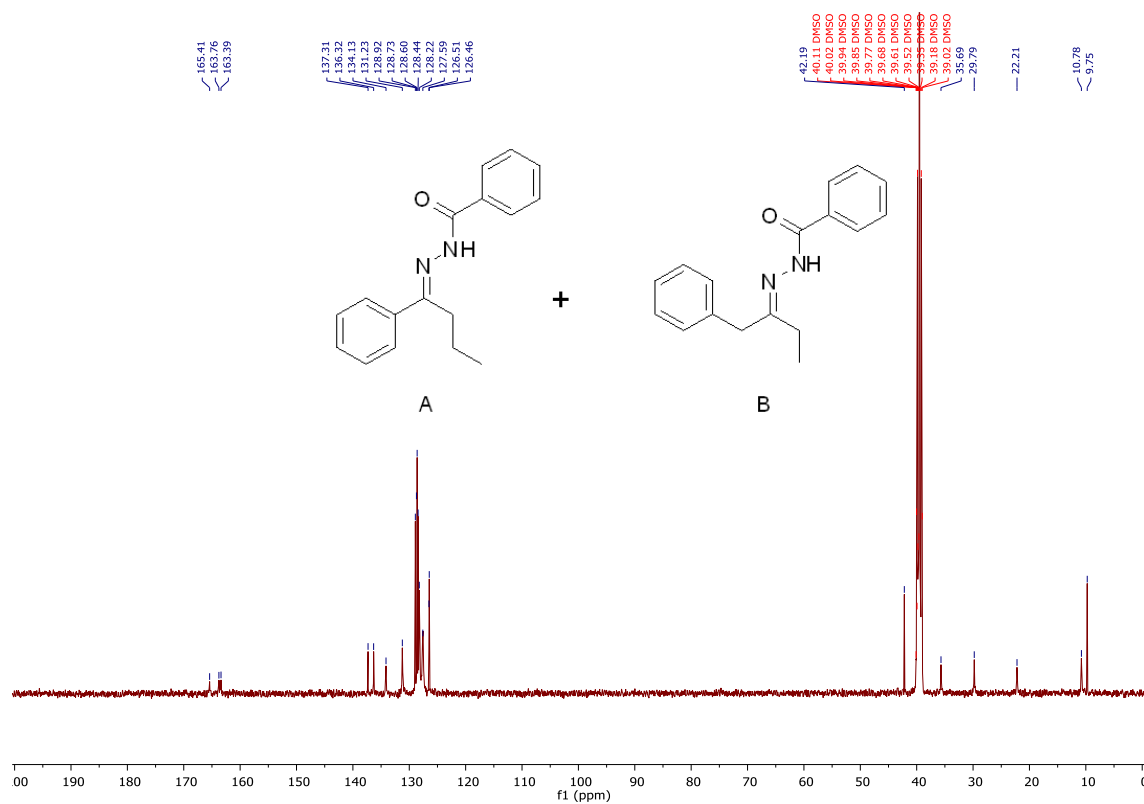

Figure S42: <sup>13</sup>C NMR of *N'*-(1-phenylbutylidene)benzohydrazide and *N'*-(1-phenylbutan-2-ylidene)benzohydrazide (7b) in DMSO-*d*<sub>6</sub>.

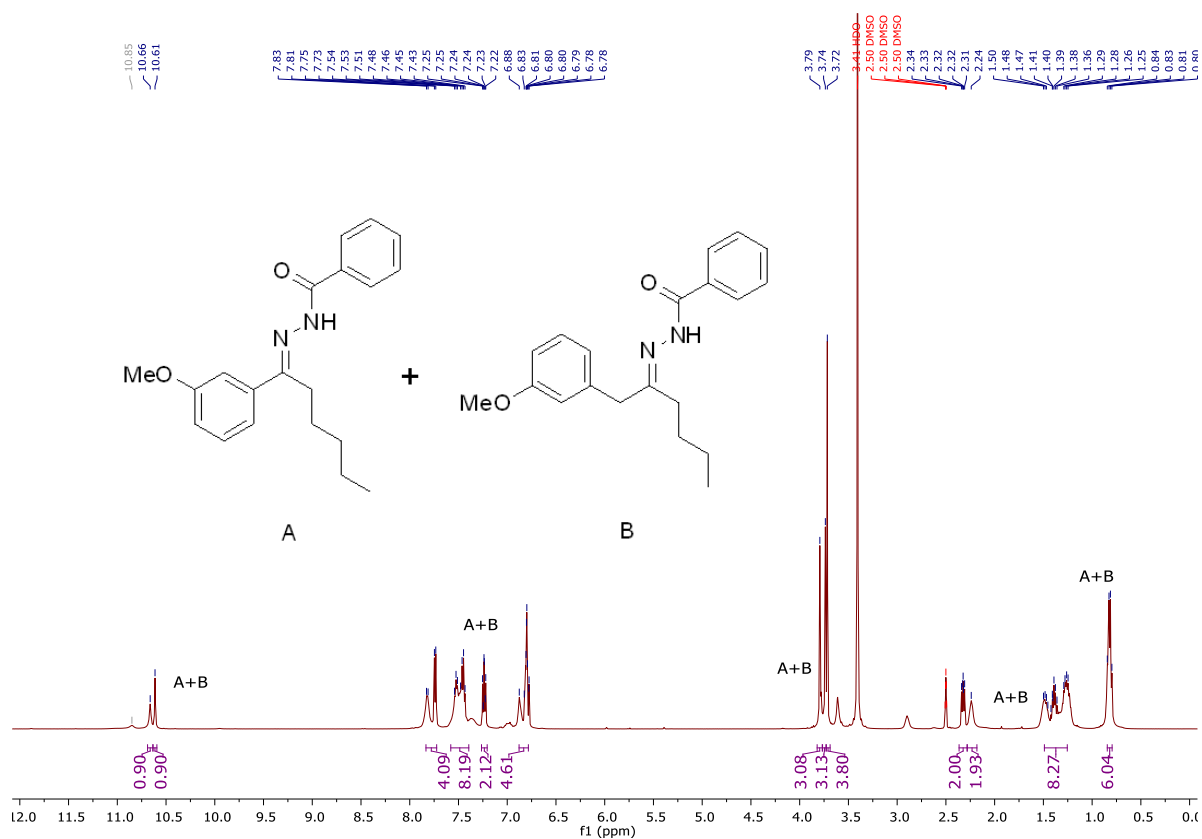

Figure S43:  $^1\text{H}$  NMR of *N'*-(1-(3-methoxyphenyl)hexylidene)benzohydrazide and *N'*-(1-(3-methoxyphenyl)hexan-2-ylidene)benzohydrazide (7c) in  $\text{DMSO}-d_6$ .

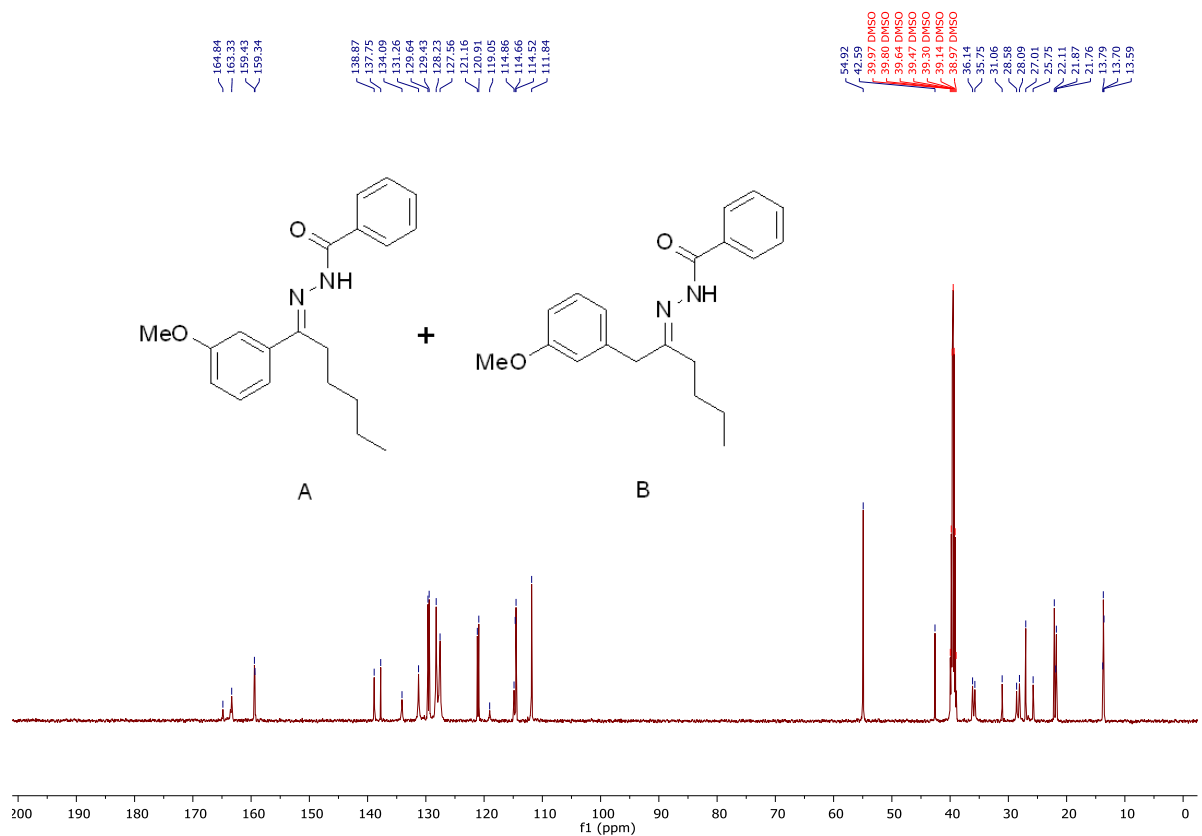

Figure S44:  $^{13}\text{C}$  NMR of *N'*-(1-(3-methoxyphenyl)hexylidene)benzohydrazide and *N'*-(1-(3-methoxyphenyl)hexan-2-ylidene)benzohydrazide (7c) in  $\text{DMSO}-d_6$ .

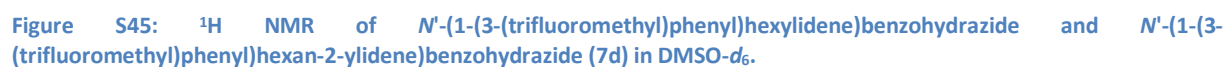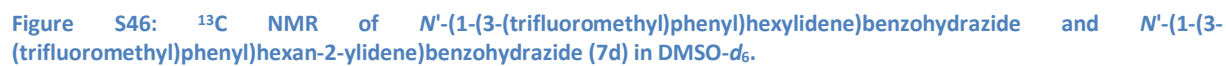

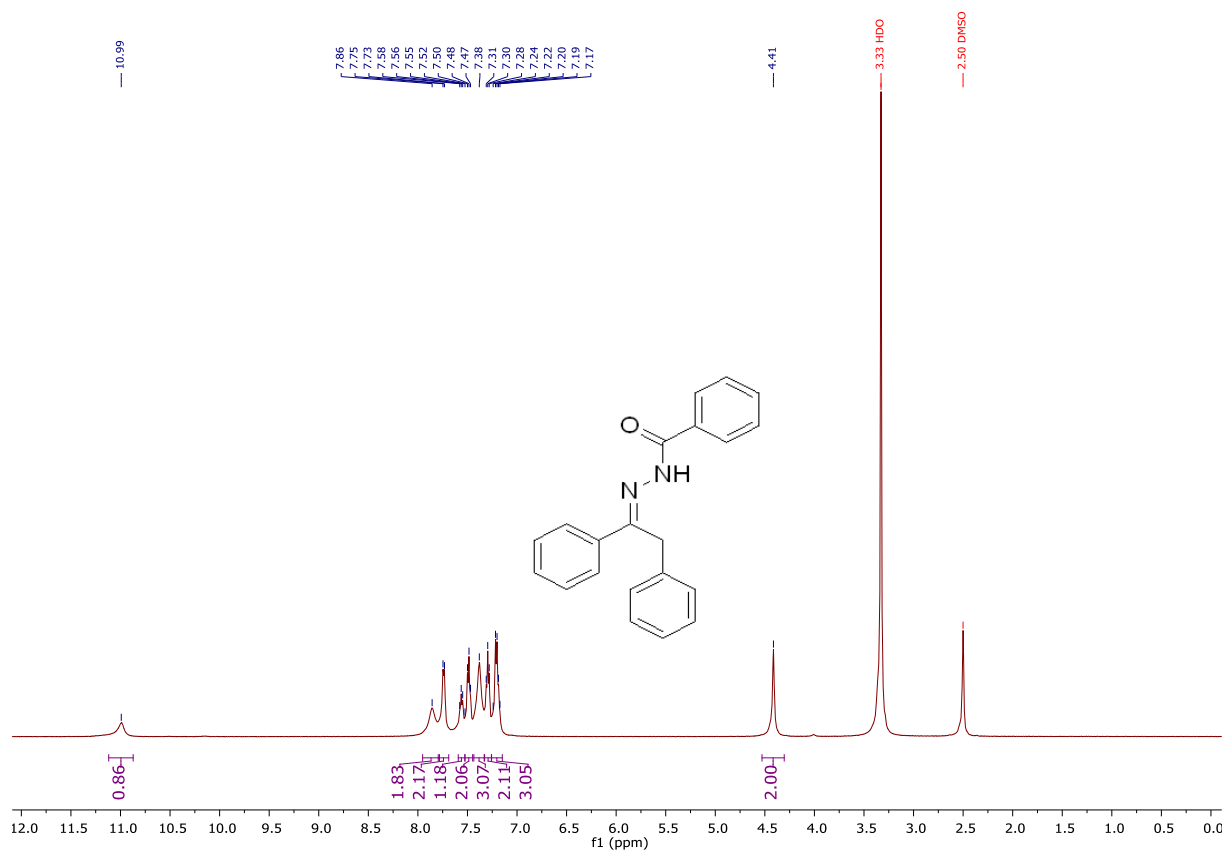

Figure S47: <sup>1</sup>H NMR of *N'*-(1,2-diphenylethylidene)benzohydrazide (7e) in DMSO-*d*<sub>6</sub>.

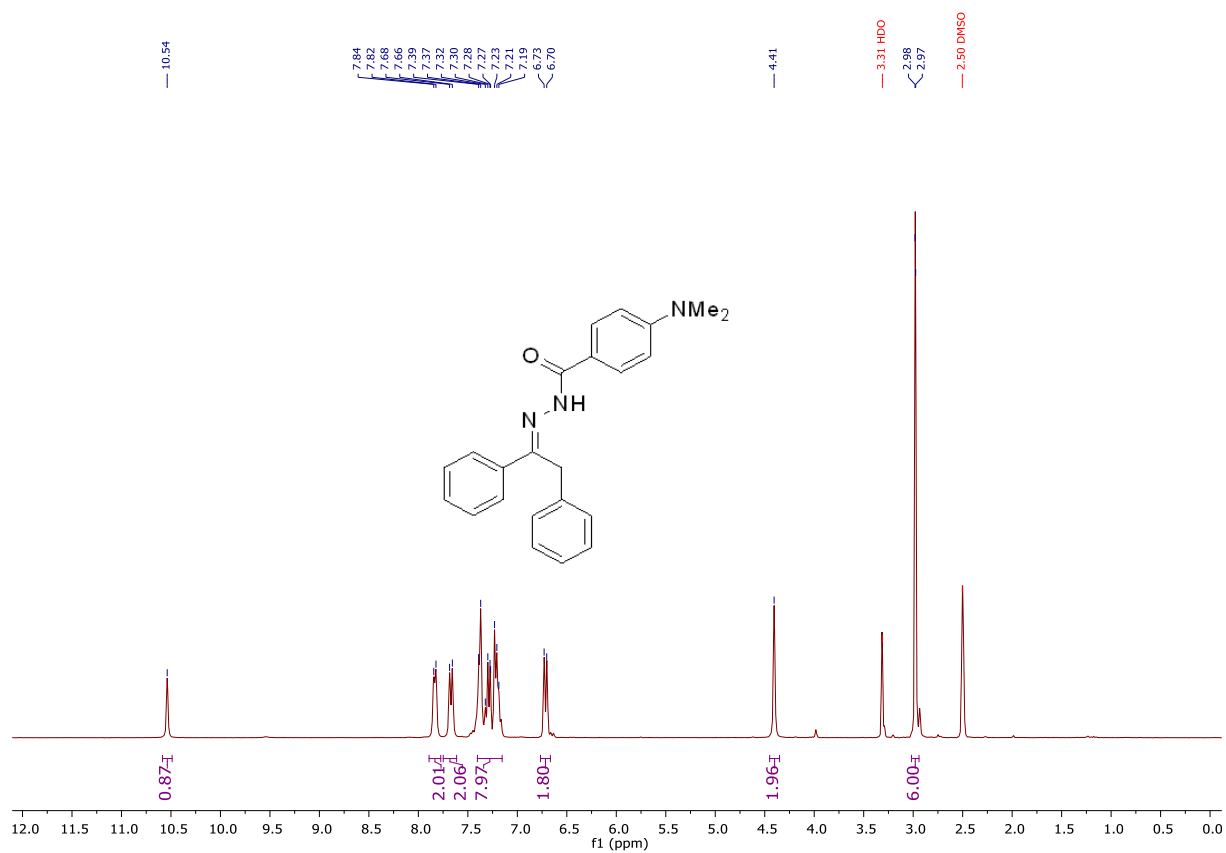

Figure S48: <sup>1</sup>H NMR of 4-(dimethylamino)-*N'*-(1,2-diphenylethylidene)benzohydrazide (7f) in DMSO-*d*<sub>6</sub>.

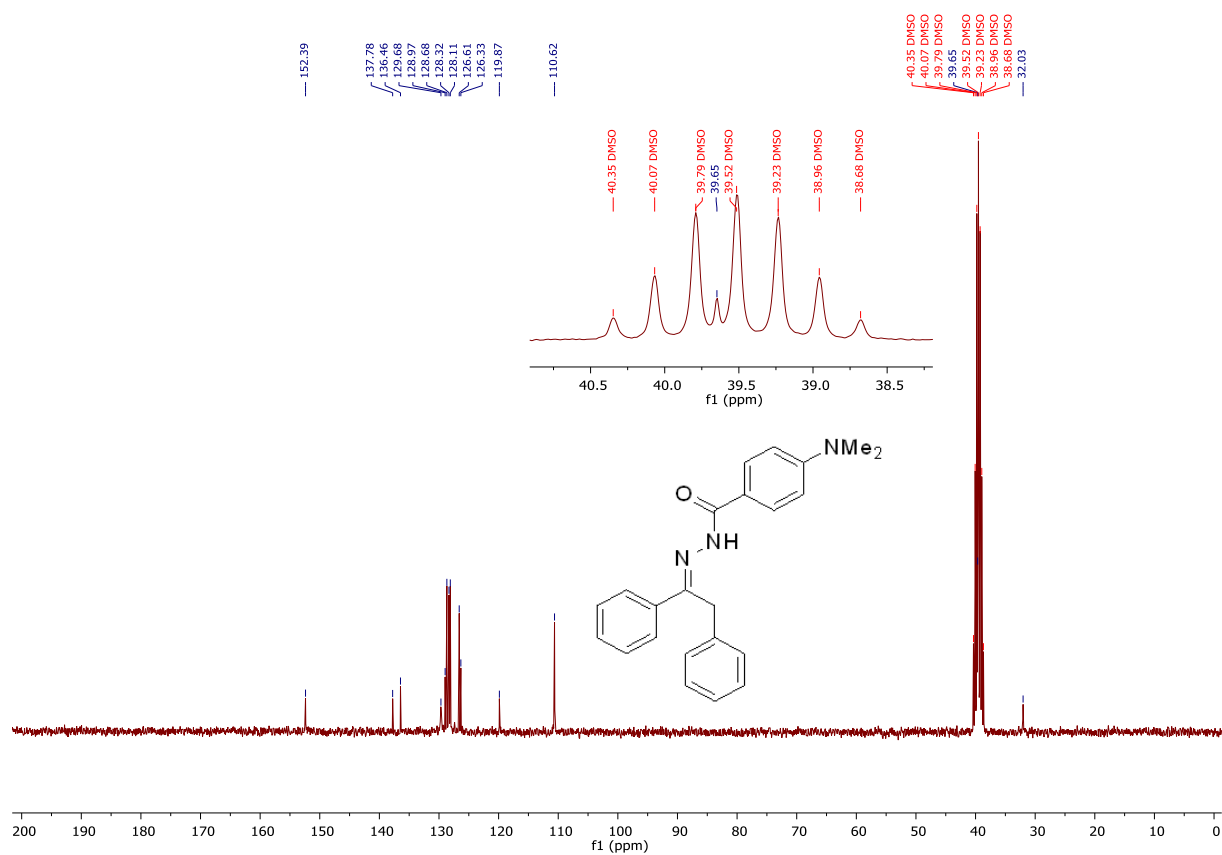

Figure S49: <sup>13</sup>C NMR of 4-(dimethylamino)-N'-(1,2-diphenylethylidene)benzohydrazide (7f) in DMSO-d<sub>6</sub>.

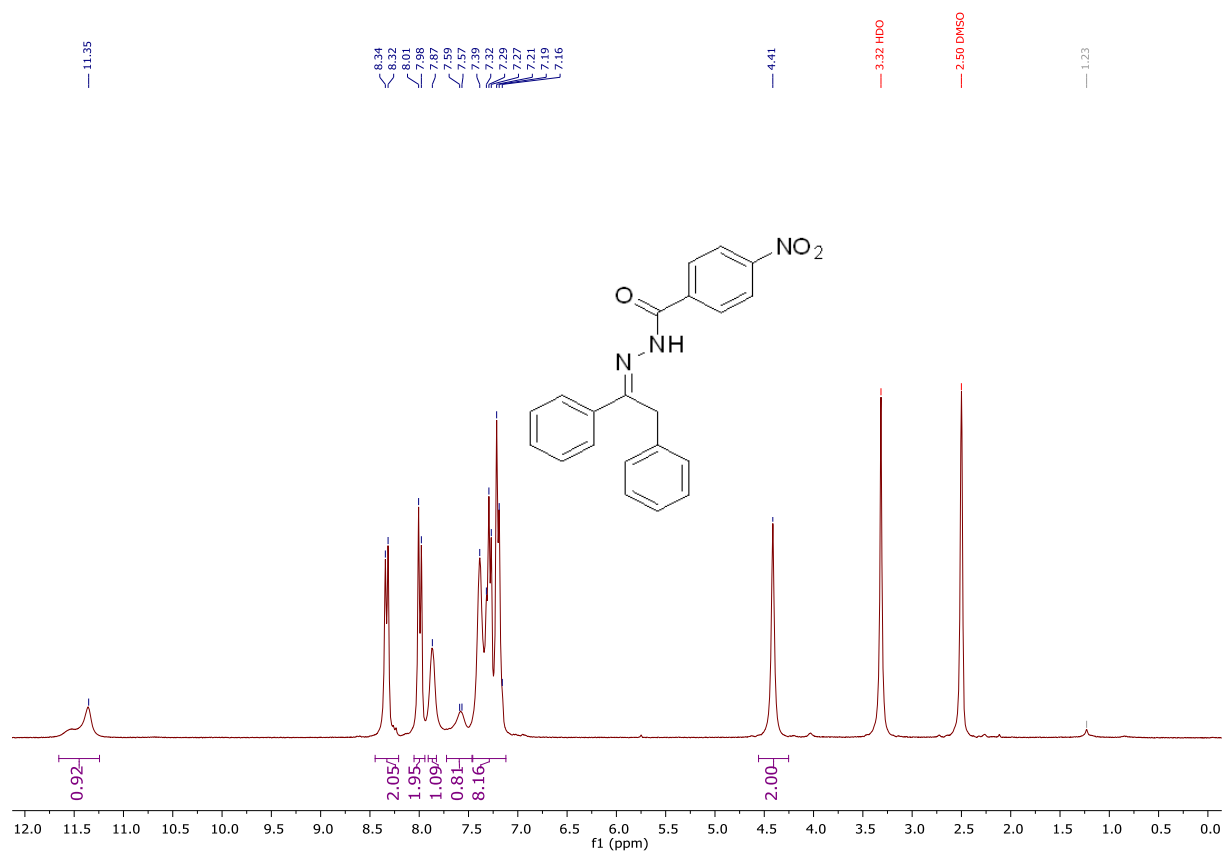

Figure S50: <sup>1</sup>H NMR of 4-nitro-N'-(1,2-diphenylethylidene)benzohydrazide (7g) in DMSO-d<sub>6</sub>.



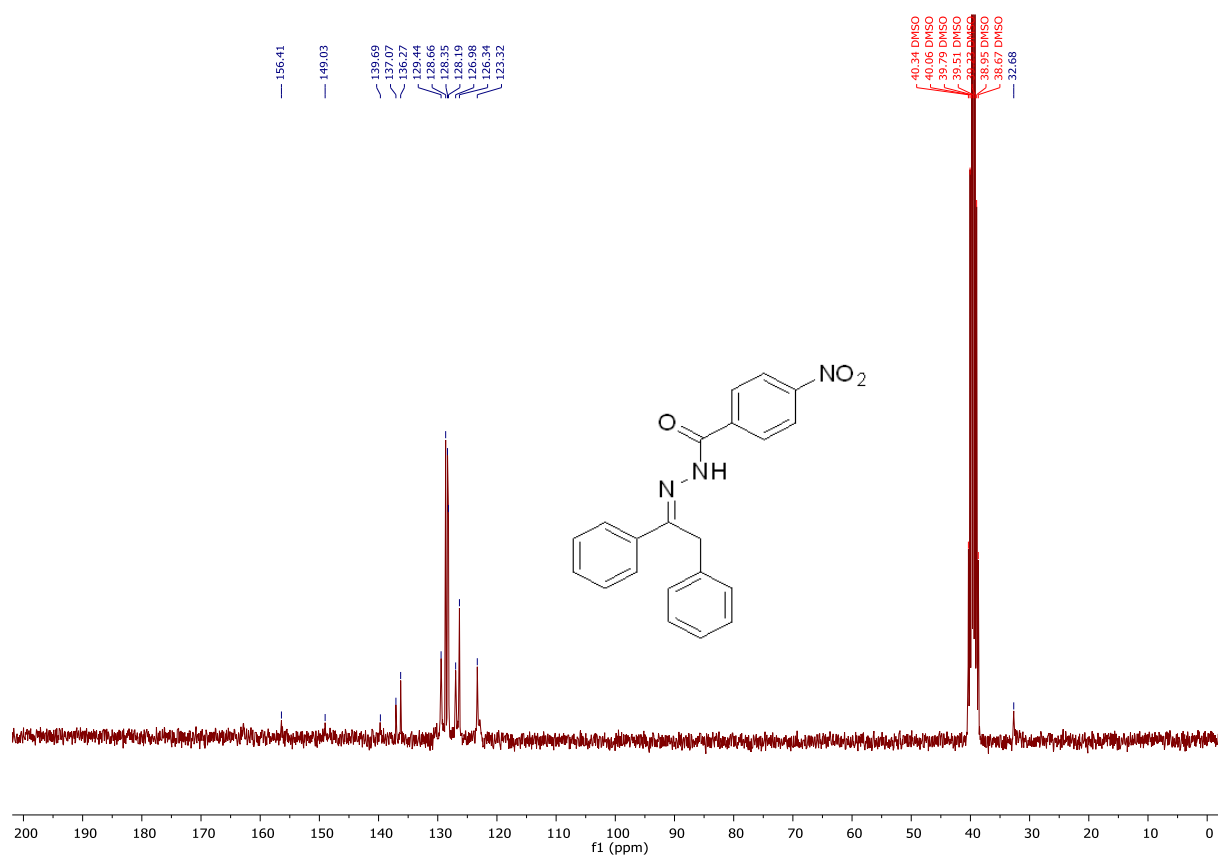

Figure S51: <sup>13</sup>C NMR of 4-nitro-*N'*-(1,2-diphenylethylidene)benzohydrazide (7g) in DMSO-*d*<sub>6</sub>.

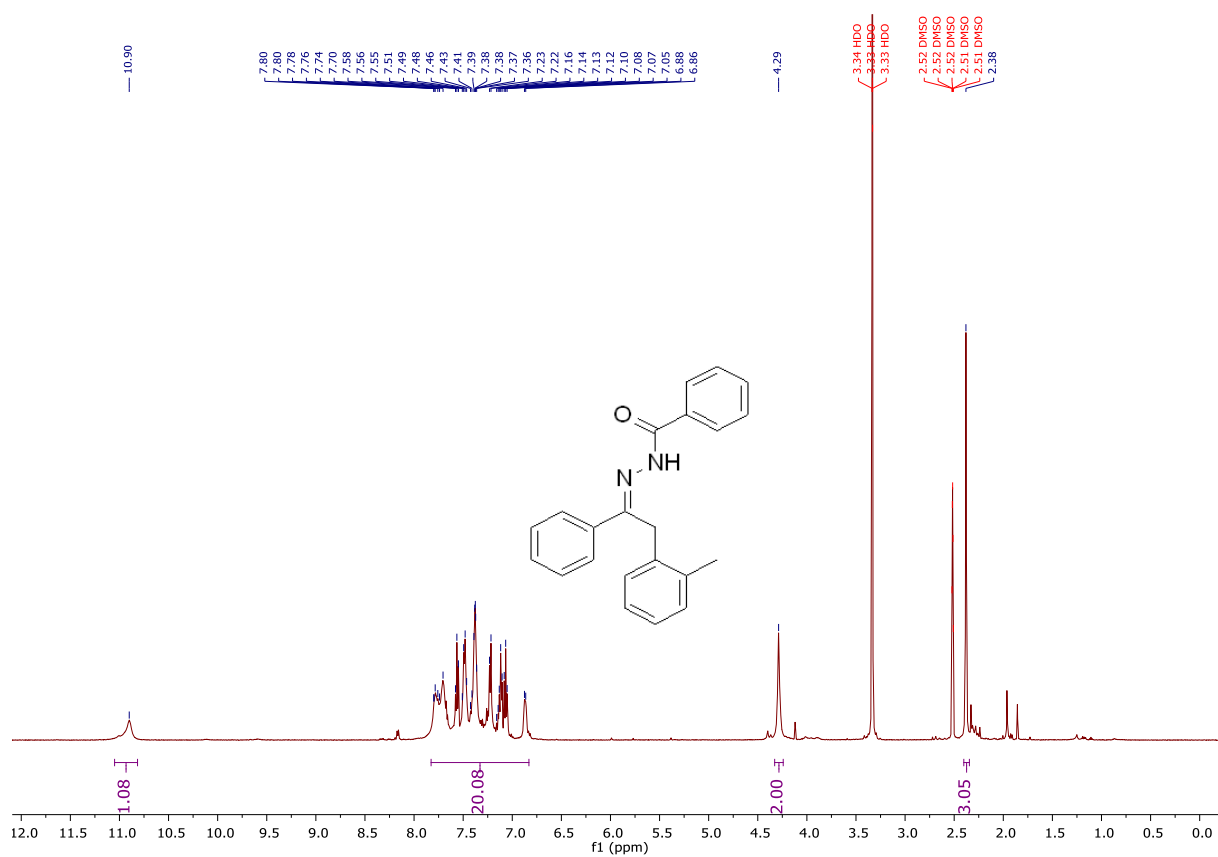

Figure S52: <sup>1</sup>H NMR of *N'*-(2-phenyl-1-(*o*-tolyl)ethylidene)benzohydrazide and *N'*-(1-phenyl-2-(*o*-tolyl)ethylidene)benzohydrazide (7h) in DMSO-*d*<sub>6</sub>.

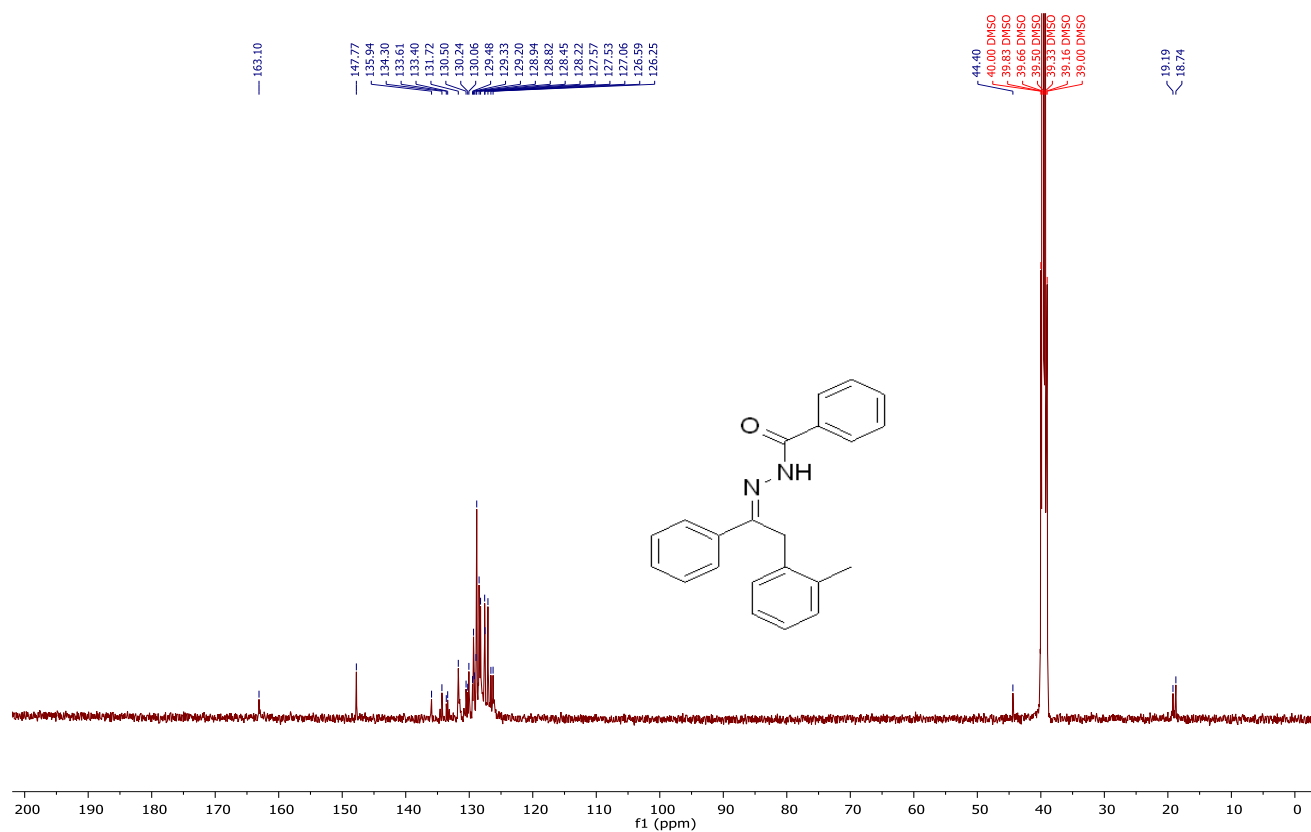

Figure S53: <sup>13</sup>C NMR of *N'*-(2-phenyl-1-(*o*-tolyl)ethylidene)benzohydrazide and *N'*-(1-phenyl-2-(*o*-tolyl)ethylidene)benzohydrazide (7h) in DMSO-*d*<sub>6</sub>.

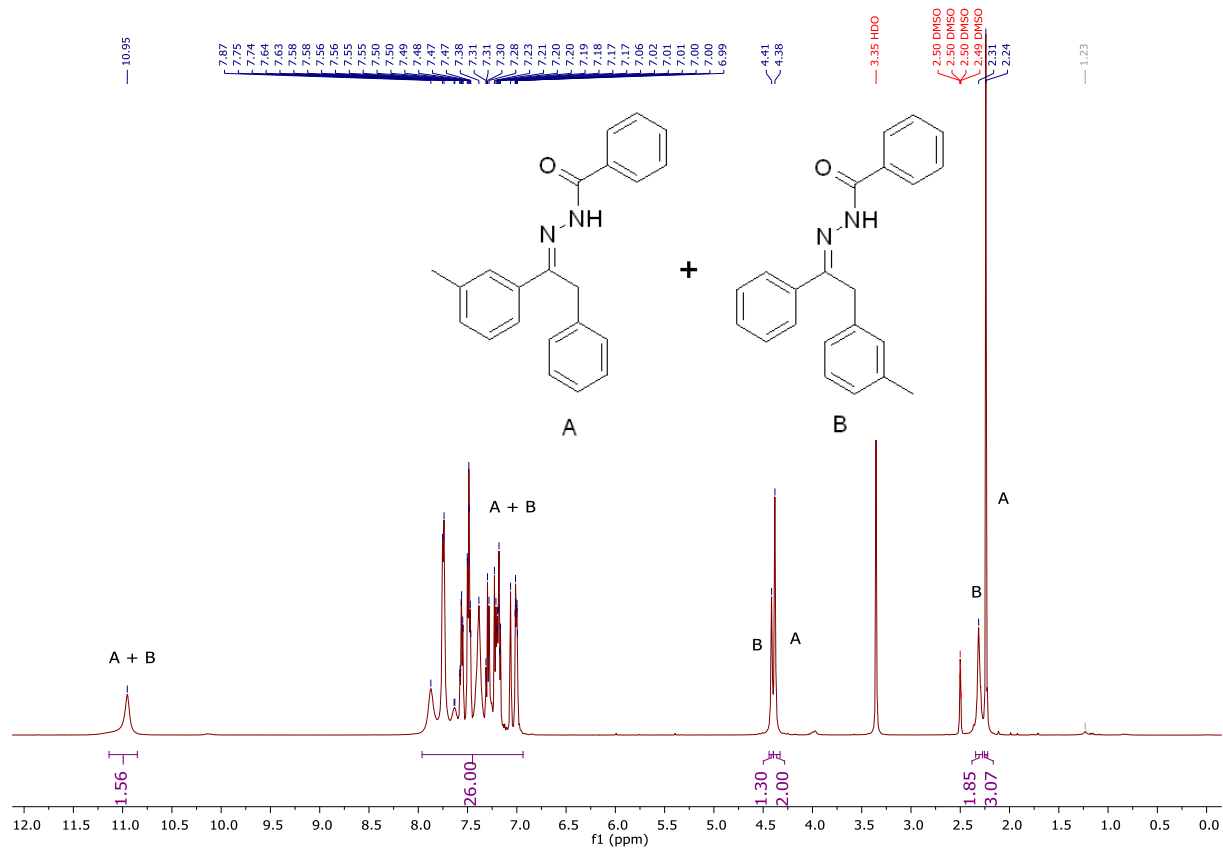

Figure S54: <sup>1</sup>H NMR of *N'*-(2-phenyl-1-(*m*-tolyl)ethylidene)benzohydrazide and *N'*-(1-phenyl-2-(*m*-tolyl)ethylidene)benzohydrazide (7i) in DMSO-*d*<sub>6</sub>.

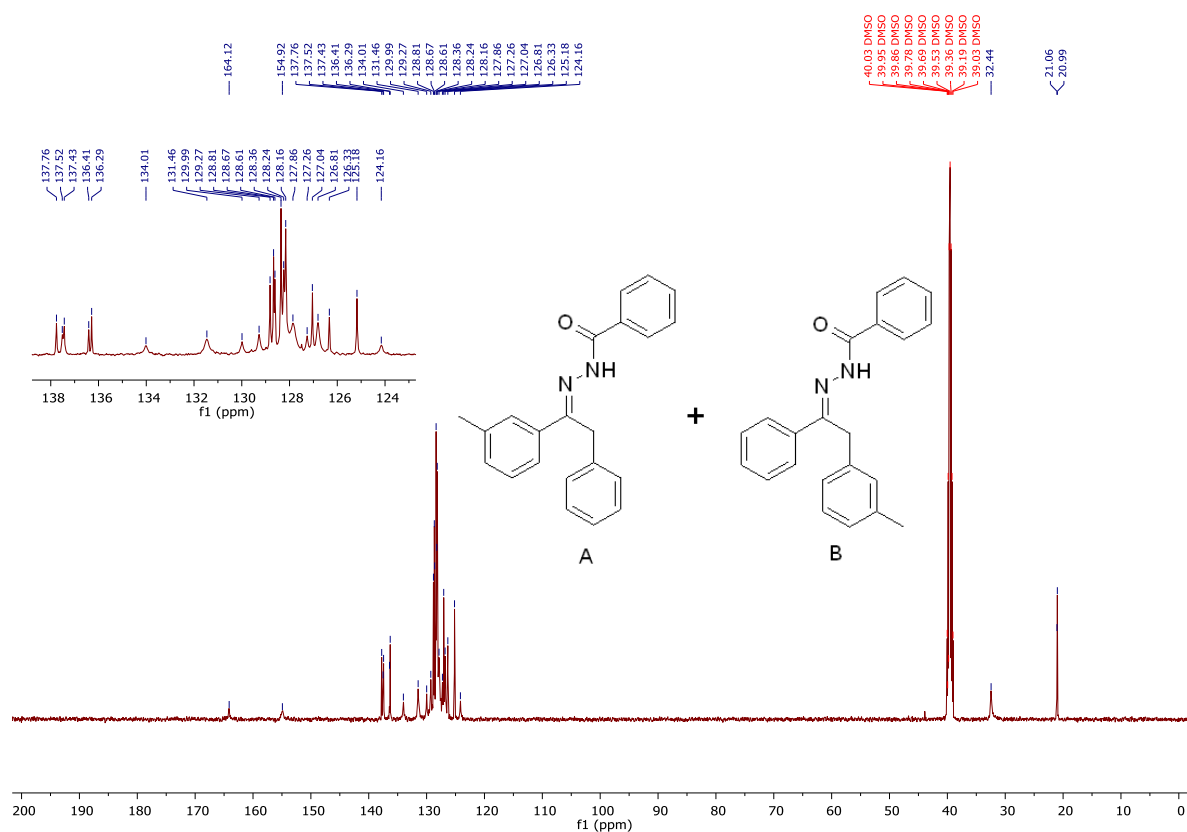

Figure S55: <sup>13</sup>C NMR of *N'*-(2-phenyl-1-(*m*-tolyl)ethylidene)benzohydrazide and *N'*-(1-phenyl-2-(*m*-tolyl)ethylidene)benzohydrazide (7i) in DMSO-*d*<sub>6</sub>.

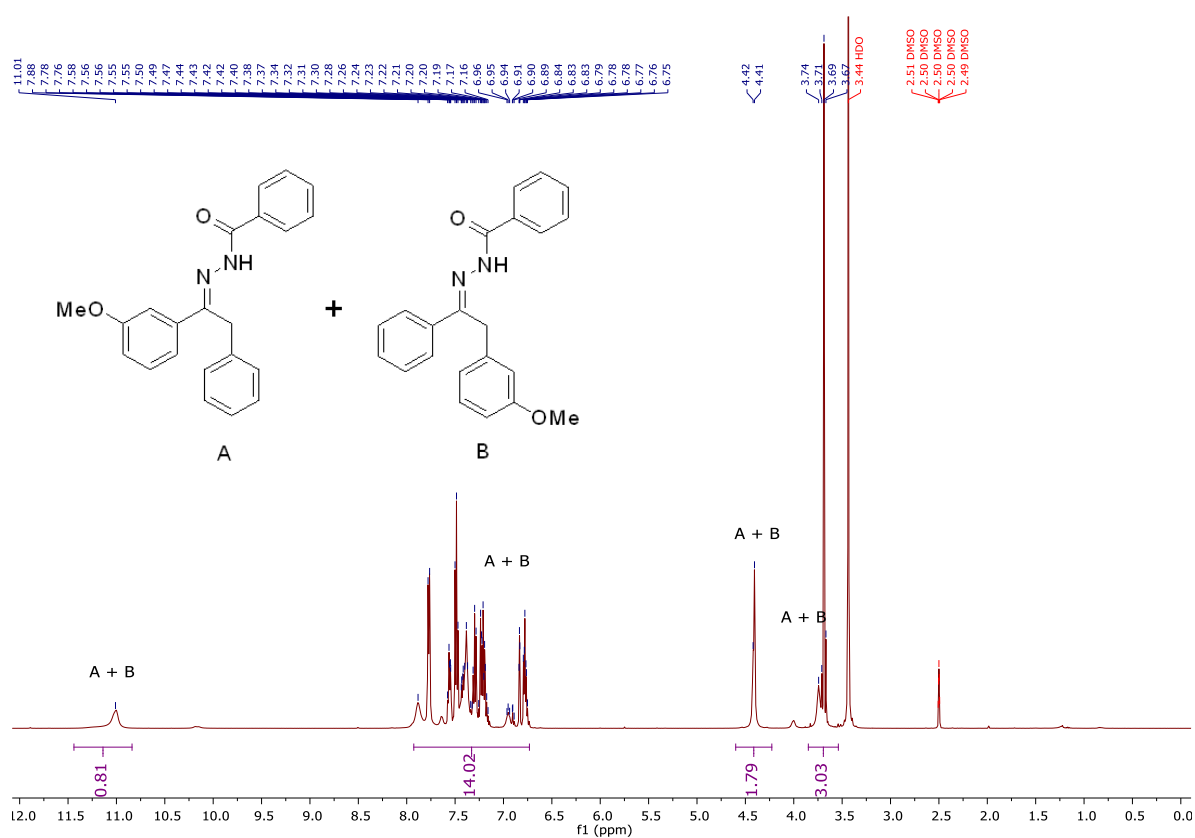

Figure S56: <sup>1</sup>H NMR of *N'*-(1-(3-methoxyphenyl)-2-phenylethylidene)benzohydrazide and *N'*-(2-(3-methoxyphenyl)-1-phenylethylidene)benzohydrazide (7j) in DMSO-*d*<sub>6</sub>.

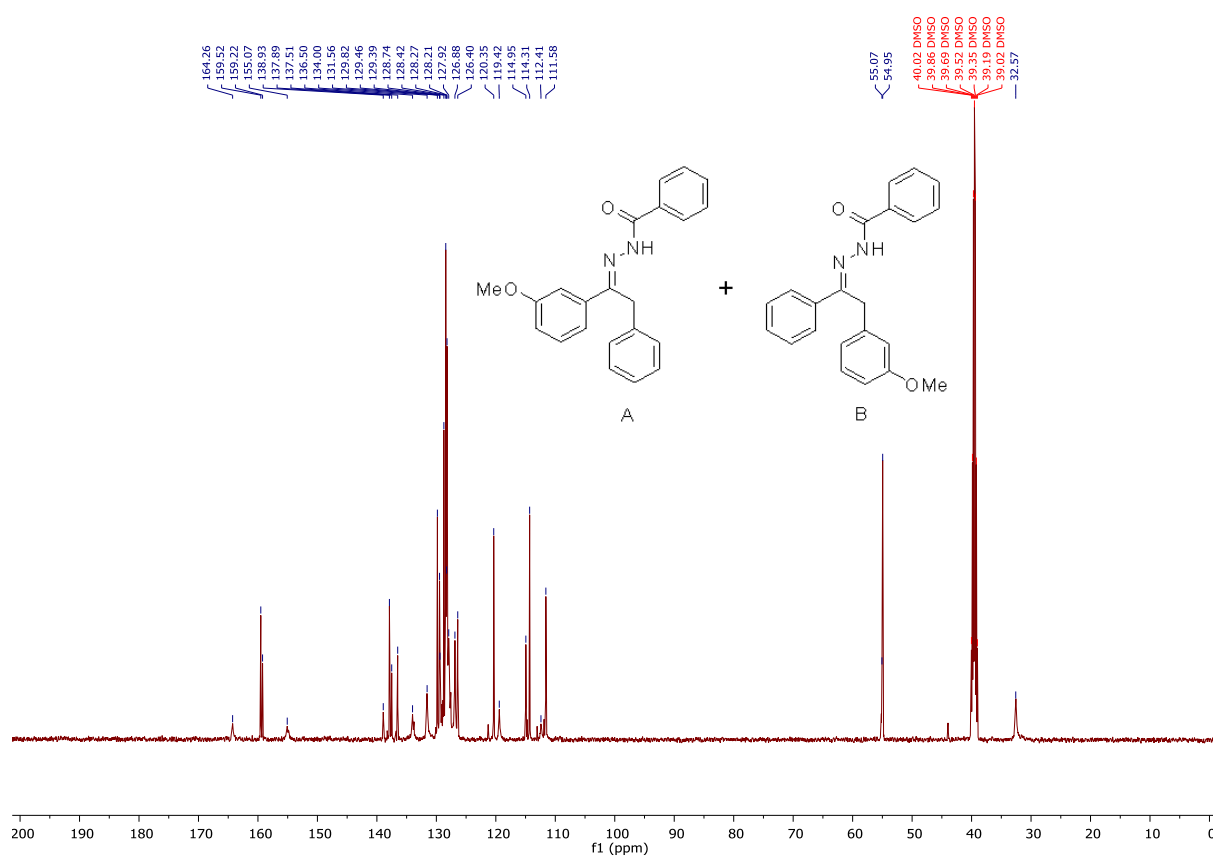

Figure S57: <sup>13</sup>C NMR of *N'*-(1-(3-methoxyphenyl)-2-phenylethylidene)benzohydrazide and *N'*-(2-(3-methoxyphenyl)-1-phenylethylidene)benzohydrazide (7j) in DMSO-*d*<sub>6</sub>.

### 3. Mass spectra

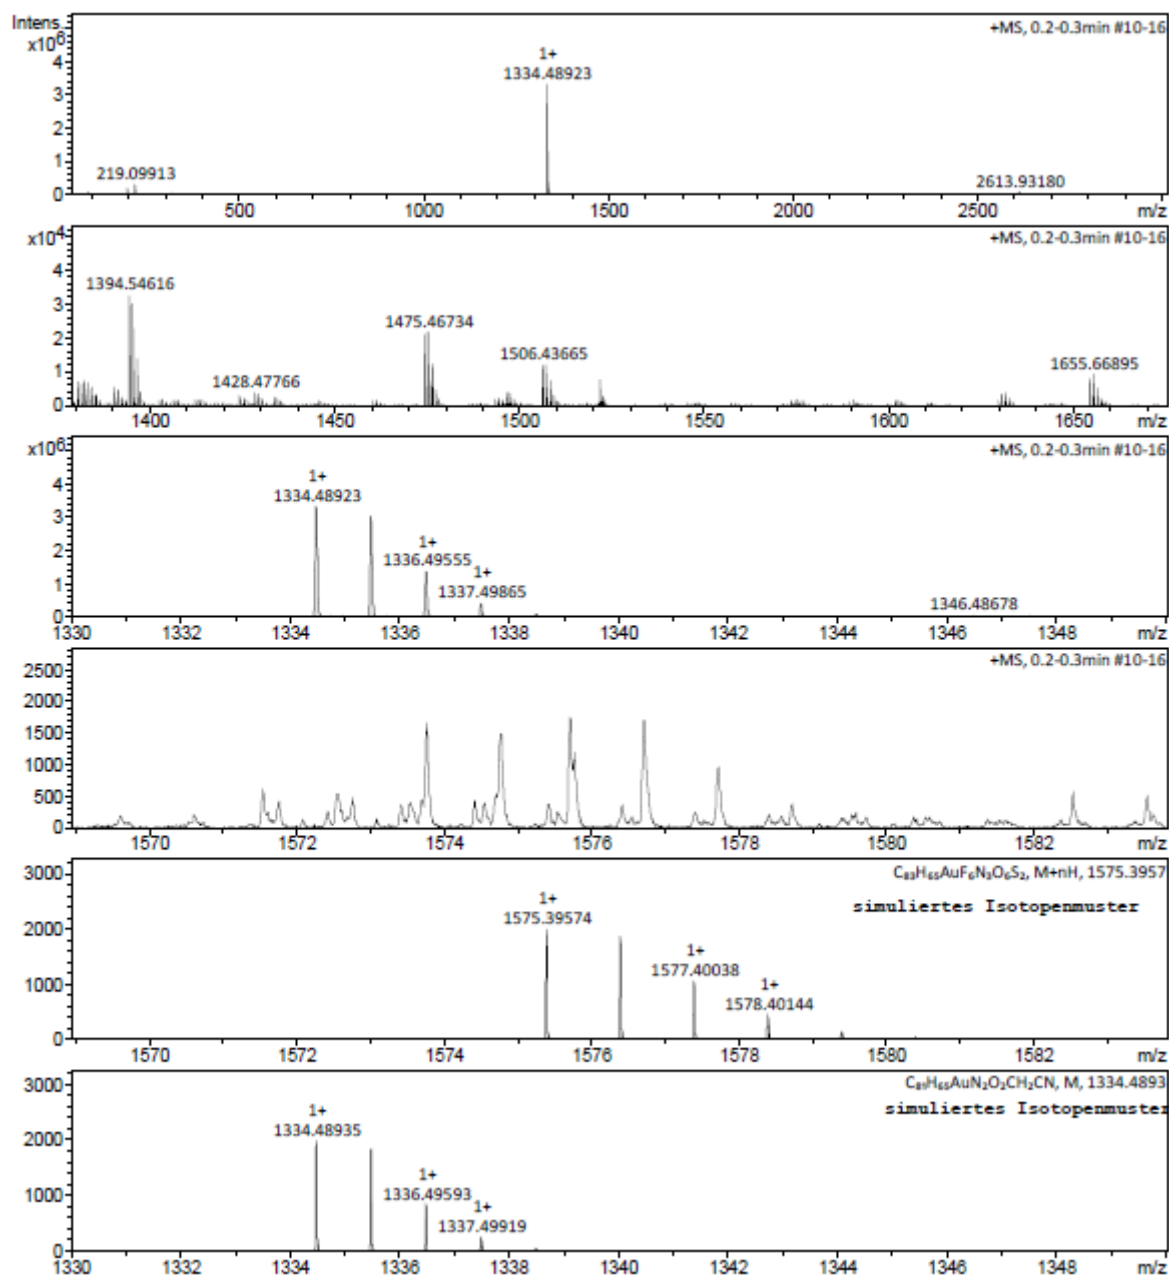

| Meas. m/z  | # | Ion Formula  | Score  | m/z        | err [mDa] | err [ppm] | mSigma | rdb  | e <sup>-</sup> | Conf | N-Rule | Adduct |
|------------|---|--------------|--------|------------|-----------|-----------|--------|------|----------------|------|--------|--------|
| 1334.48923 | 1 | C83H67AuN3O2 | 100.00 | 1334.48935 | 0.12      | 0.09      | 2.7    | 51.5 | even           |      | ok     | M      |

Figure S58: HRMS of complex 1.

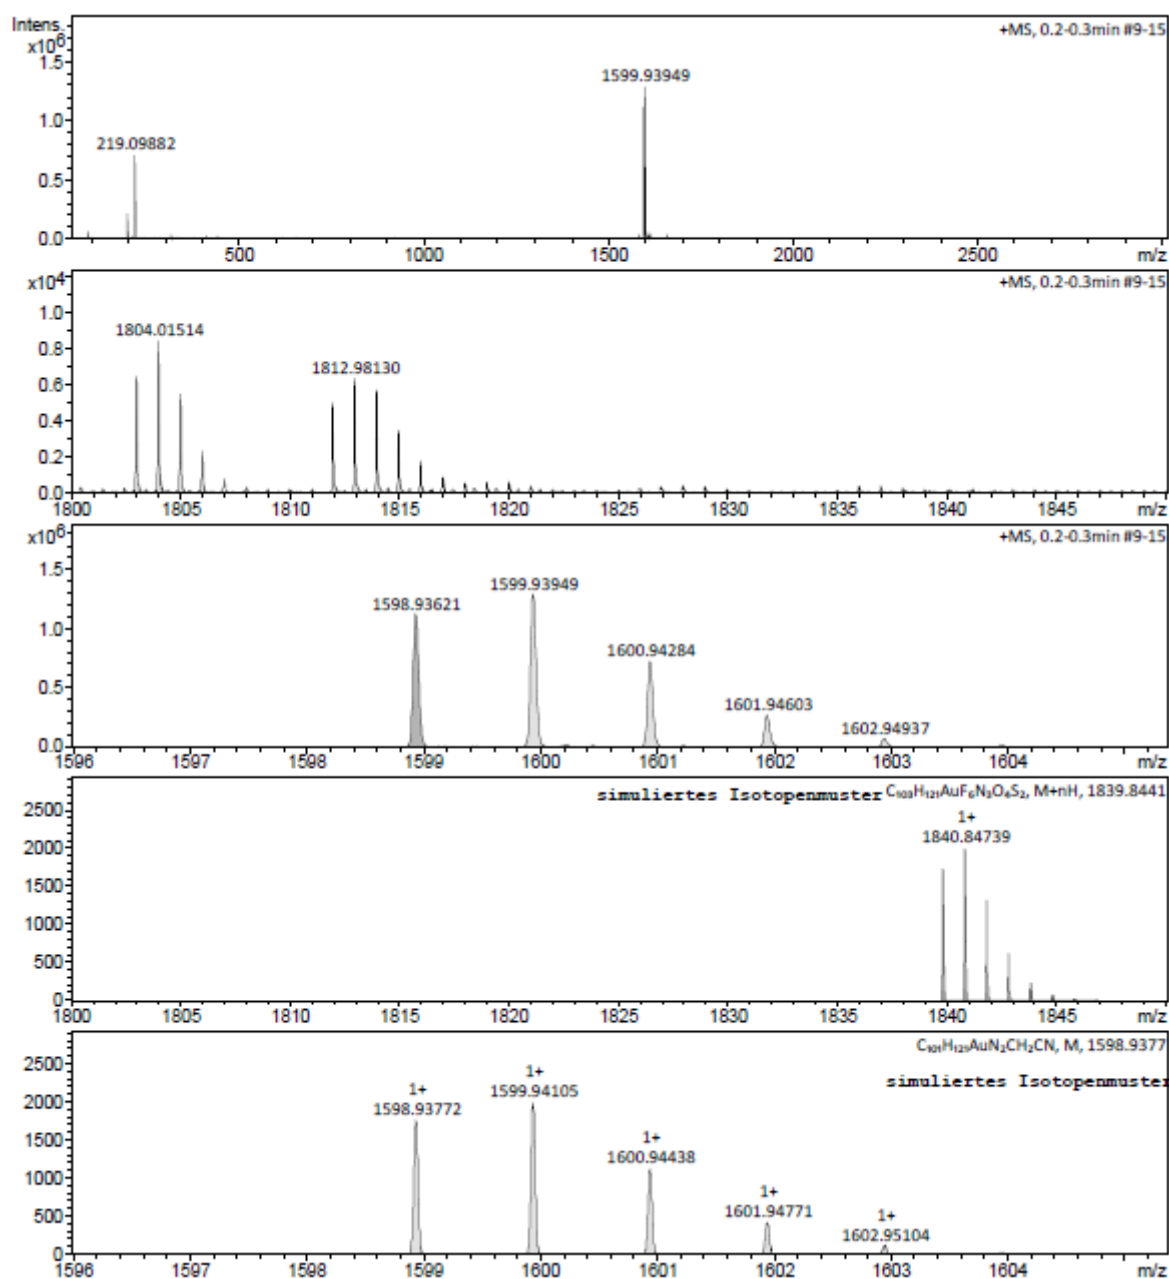

| # | Meas. m/z  | Ion Formula    | m/z        | Sum Formula    | err  [mDa] | err [ppm] | e <sup>-</sup> Conf | Adduct |
|---|------------|----------------|------------|----------------|------------|-----------|---------------------|--------|
| 1 | 1598.93621 | C103H123AuN3   | 1598.93772 | C103H123AuN3   | 1.51       | 0.95      | even                | M      |
| 2 | 1598.93621 | C100H125AuN2O3 | 1598.93504 | C100H125AuN2O3 | 1.17       | -0.73     | odd                 | M      |
| 3 | 1598.93621 | C89H254AuNO4   | 1598.93631 | C89H254AuNO4   | 0.10       | 0.06      | odd                 | M      |
| 4 | 1598.93621 | C87H252AuN4O3  | 1598.93497 | C87H252AuN4O3  | 1.24       | -0.78     | even                | M      |

Figure S59: HRMS of complex 2.

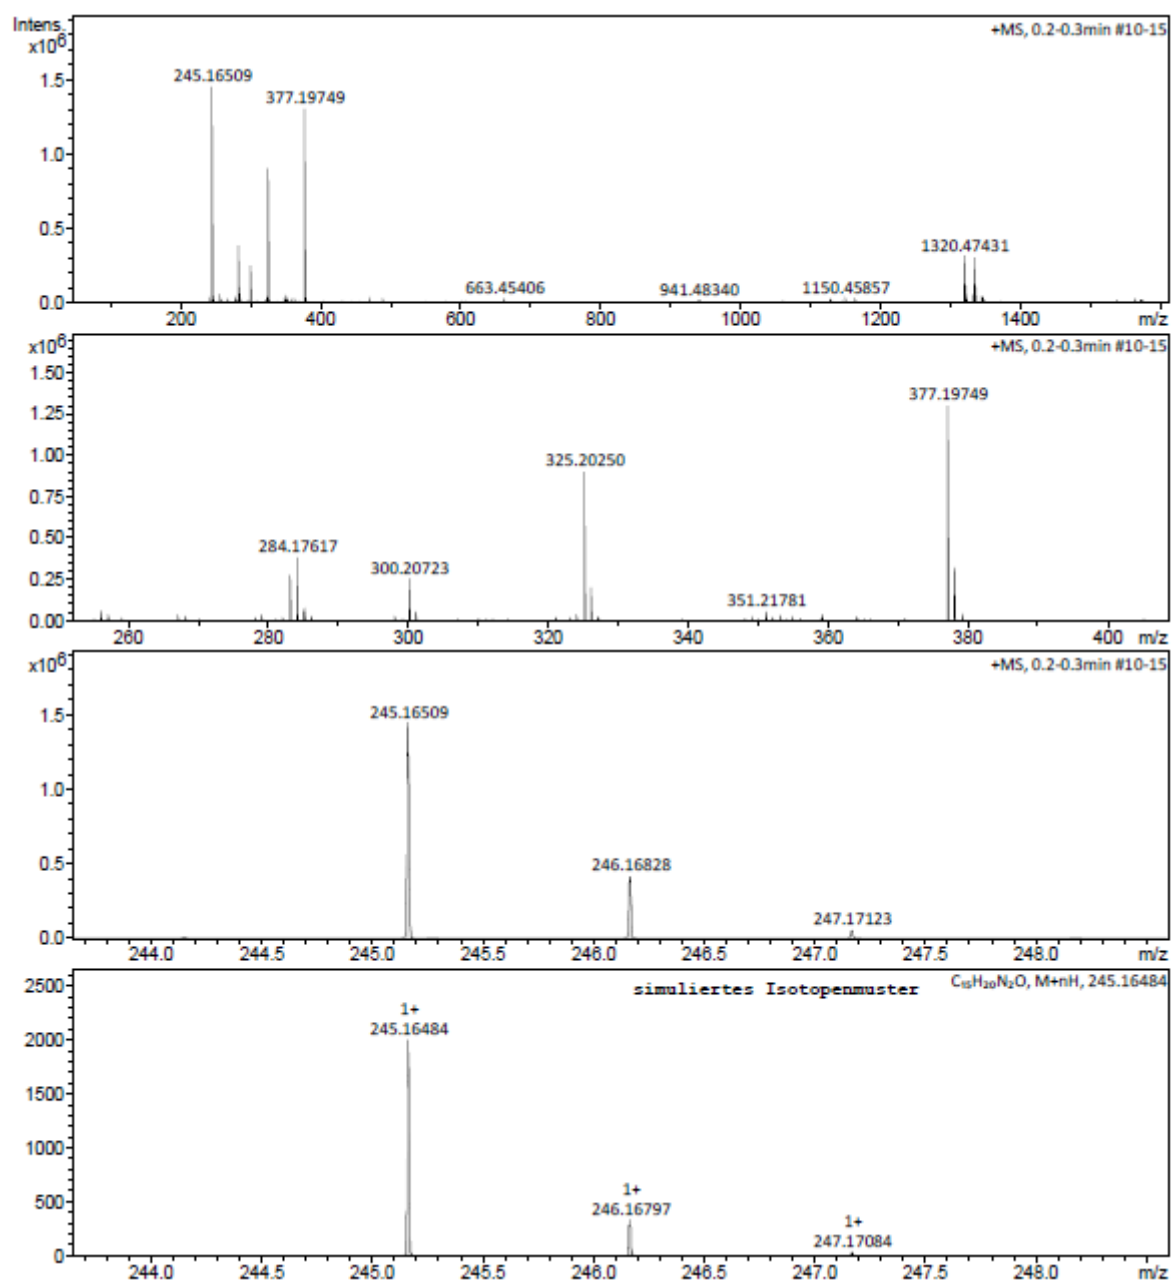

| # | Meas. m/z | Ion Formula                                      | m/z       | Sum Formula                                      | err  [mDa] | err [ppm] | e <sup>-</sup> Conf | Adduct |
|---|-----------|--------------------------------------------------|-----------|--------------------------------------------------|------------|-----------|---------------------|--------|
| 1 | 245.16509 | C <sub>15</sub> H <sub>21</sub> N <sub>2</sub> O | 245.16484 | C <sub>15</sub> H <sub>20</sub> N <sub>2</sub> O | 0.25       | -1.04     | even                | M+H    |

Figure S60: HRMS of *N'*-(1-cyclohexylethylidene)benzohydrazide (6b).

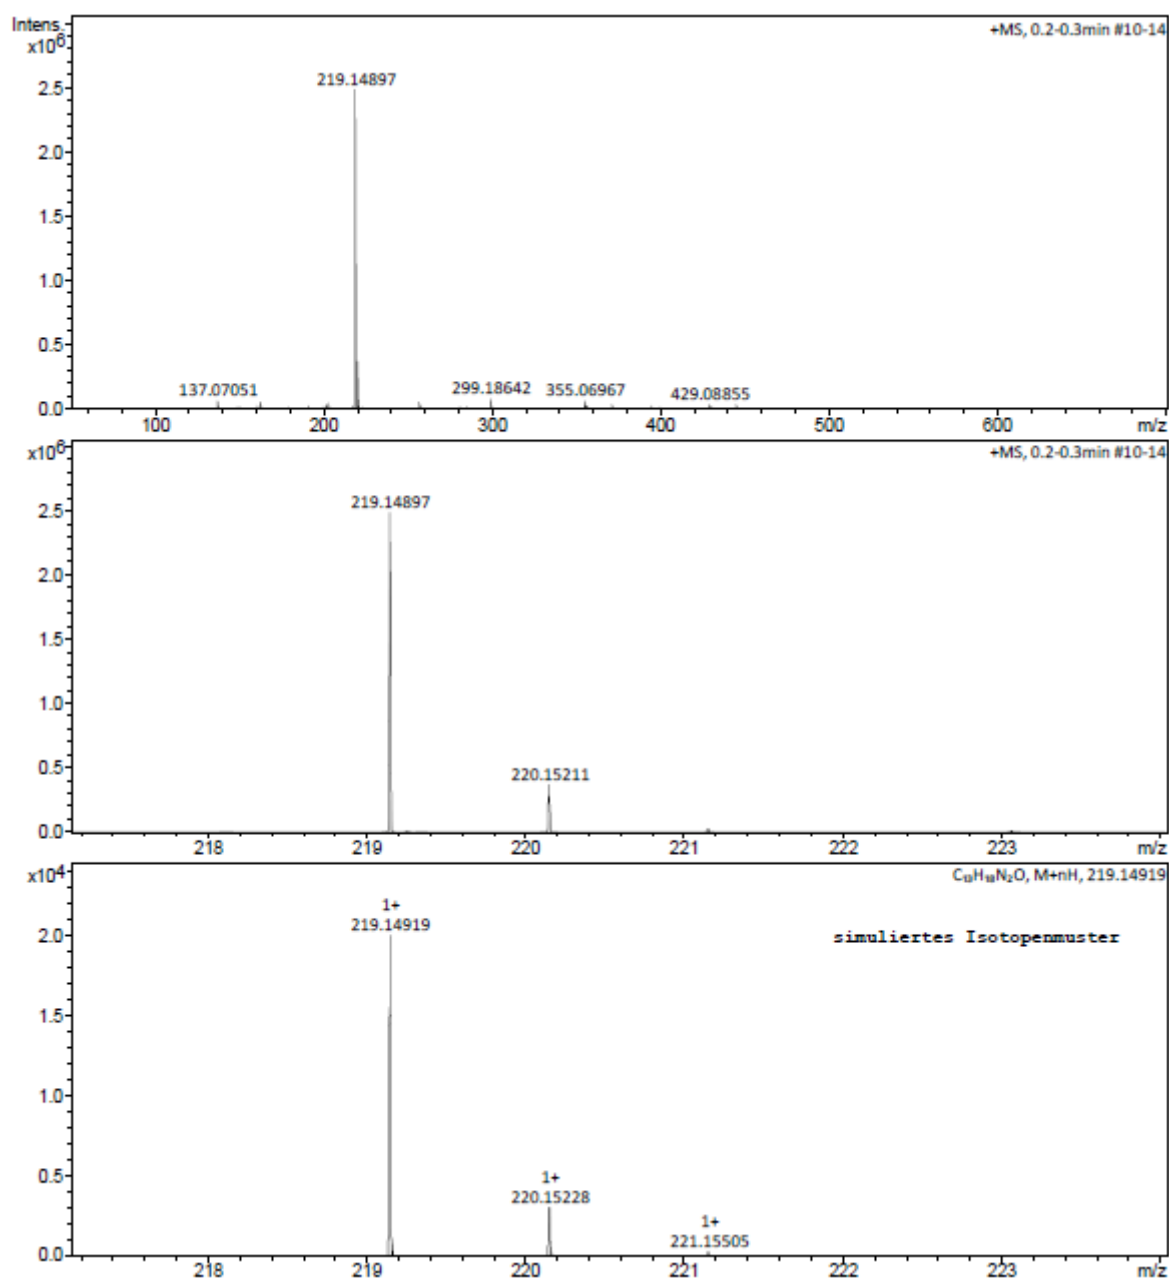

| # | Meas. m/z | Ion Formula                                      | m/z       | Sum Formula                                      | err  [mDa] | err [ppm] | e <sup>-</sup> | Conf | Adduct |
|---|-----------|--------------------------------------------------|-----------|--------------------------------------------------|------------|-----------|----------------|------|--------|
| 1 | 219.14897 | C <sub>13</sub> H <sub>19</sub> N <sub>2</sub> O | 219.14919 | C <sub>13</sub> H <sub>18</sub> N <sub>2</sub> O | 0.22       | 1.02      | even           |      | M+H    |

Figure S61: HRMS of *N'*-(3,3-dimethylbutan-2-ylidene)benzohydrazide (6c).



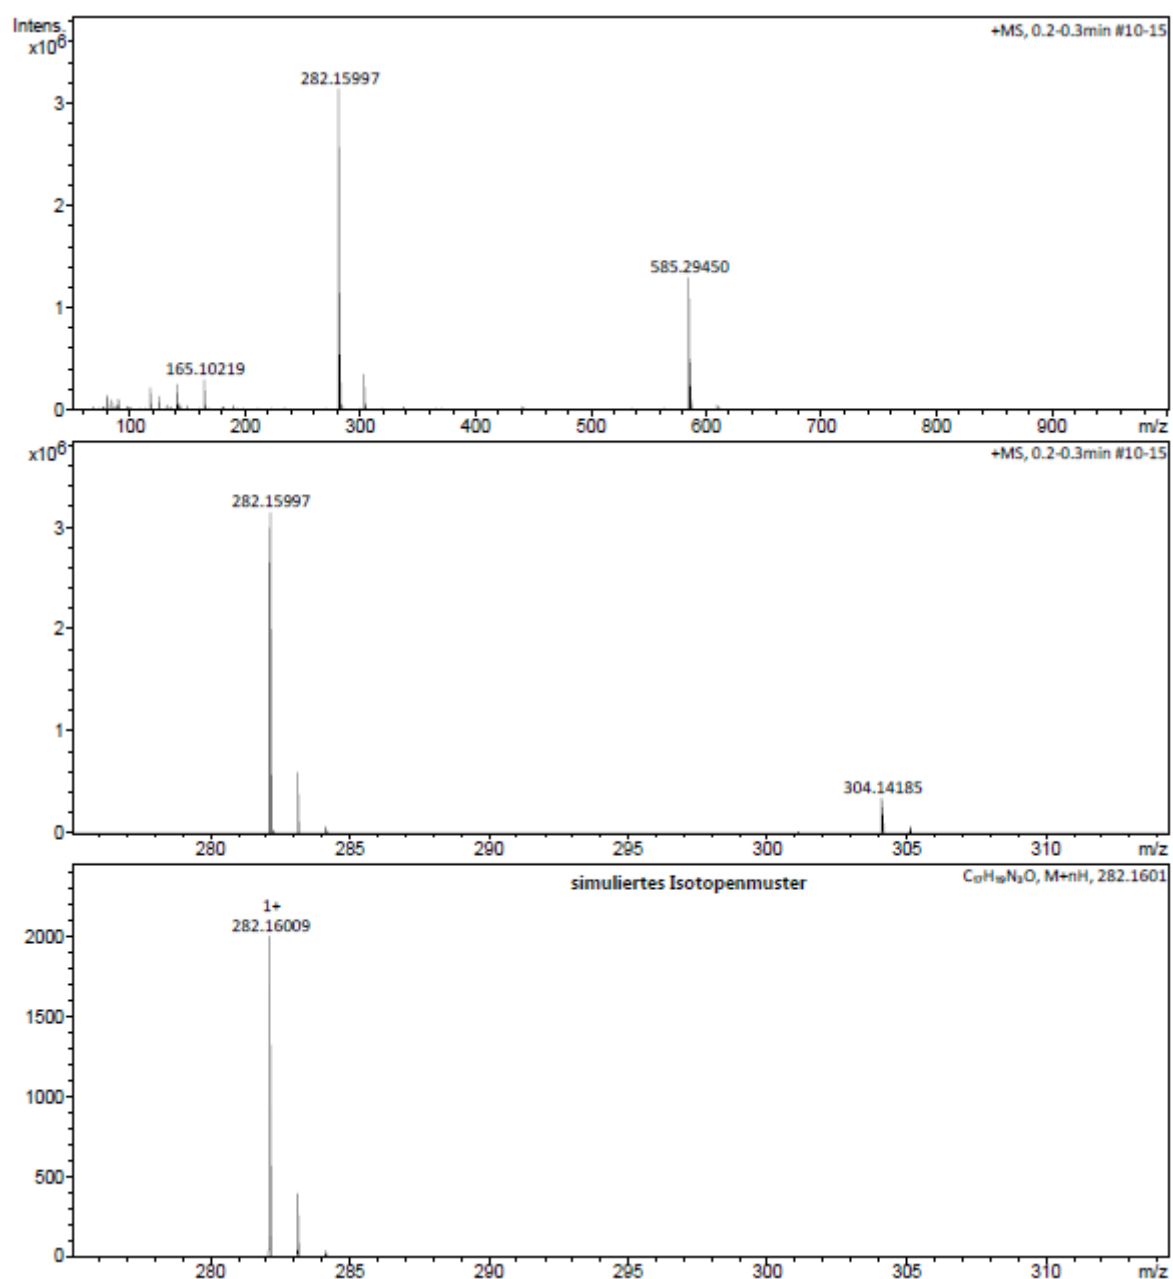

| # | Meas. m/z | Ion Formula                                                     | m/z       | Sum Formula                                      | err  [mDa] | err [ppm] | e <sup>-</sup> Conf | Adduct |
|---|-----------|-----------------------------------------------------------------|-----------|--------------------------------------------------|------------|-----------|---------------------|--------|
| 1 | 282.15997 | C <sub>17</sub> H <sub>20</sub> N <sub>3</sub> O                | 282.16009 | C <sub>17</sub> H <sub>19</sub> N <sub>3</sub> O | 0.11       | 0.41      | even                | M+H    |
| 1 | 304.14185 | C <sub>17</sub> H <sub>19</sub> N <sub>3</sub> NaO              | 304.14203 | C <sub>17</sub> H <sub>19</sub> N <sub>3</sub> O | 0.18       | 0.60      | even                | M+Na   |
| 1 | 585.29450 | C <sub>34</sub> H <sub>38</sub> N <sub>6</sub> NaO <sub>2</sub> | 585.29485 | C <sub>17</sub> H <sub>19</sub> N <sub>3</sub> O | 0.34       | 0.59      | even                | 2M+Na  |

Figure S62: HRMS of 4-(dimethylamino)-(1-phenylethylidene)benzohydrazide (6e).

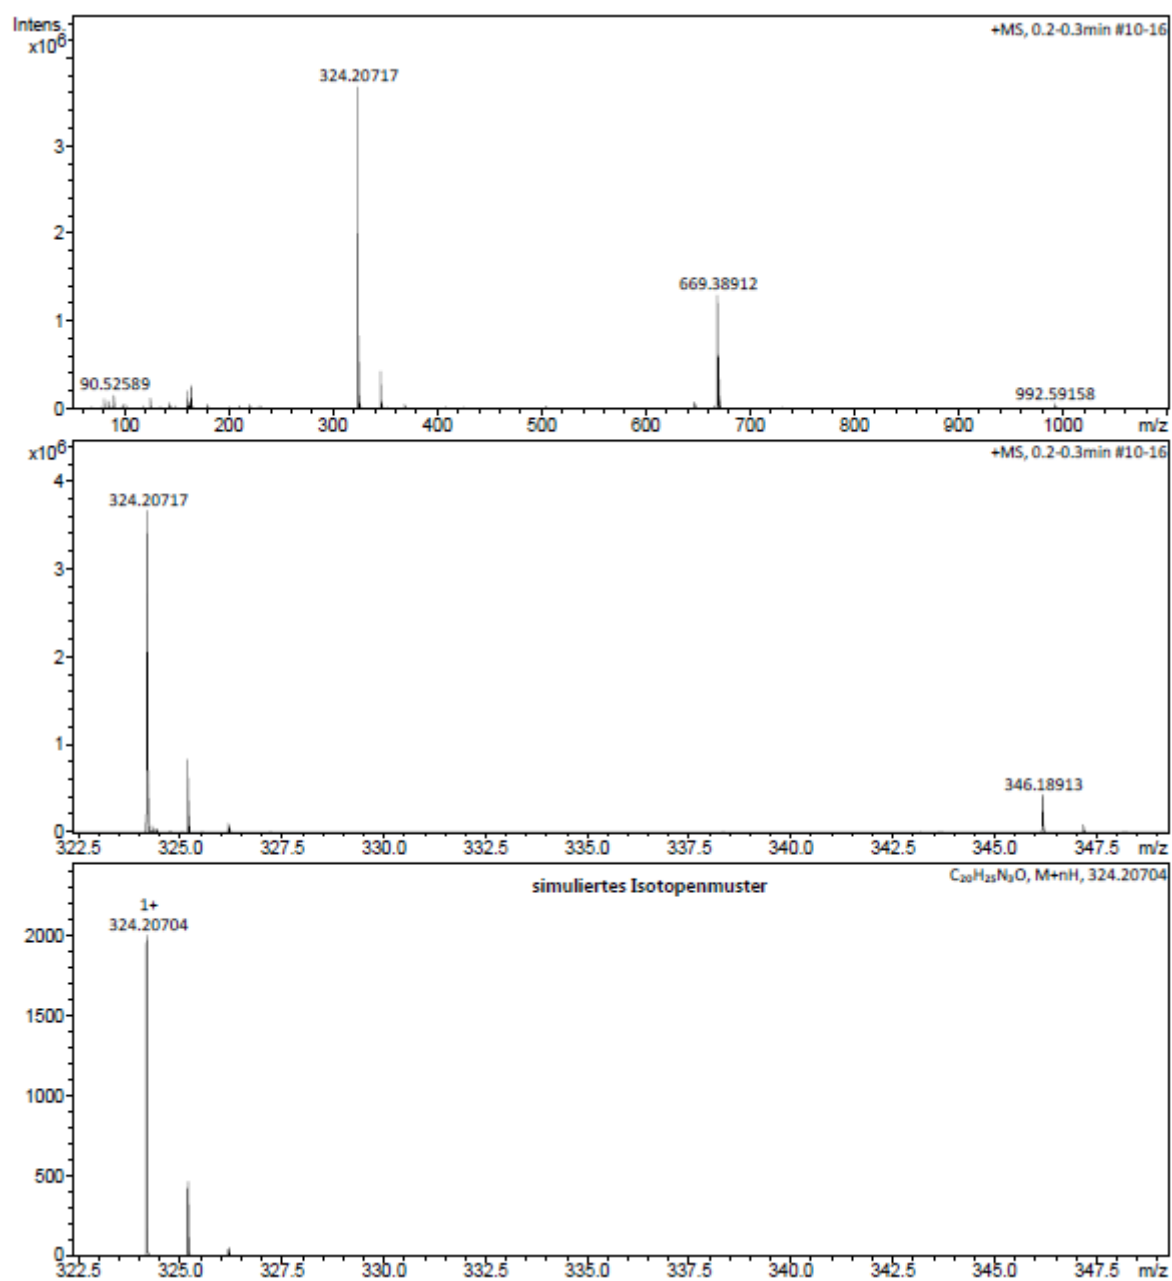

| # | Meas. m/z | Ion Formula                                                     | m/z       | Sum Formula                                      | err  [mDa] | err [ppm] | e <sup>-</sup> | Conf | Adduct |
|---|-----------|-----------------------------------------------------------------|-----------|--------------------------------------------------|------------|-----------|----------------|------|--------|
| 1 | 324.20717 | C <sub>20</sub> H <sub>26</sub> N <sub>3</sub> O                | 324.20704 | C <sub>20</sub> H <sub>25</sub> N <sub>3</sub> O | 0.13       | -0.41     | even           |      | M+H    |
| 1 | 669.38912 | C <sub>40</sub> H <sub>50</sub> N <sub>6</sub> NaO <sub>2</sub> | 669.38875 | C <sub>20</sub> H <sub>25</sub> N <sub>3</sub> O | 0.37       | -0.56     | even           |      | 2M+Na  |

Figure S63: HRMS of 4-(dimethylamino)-N'-(1-mesitylethylidene)benzohydrazide (6h).

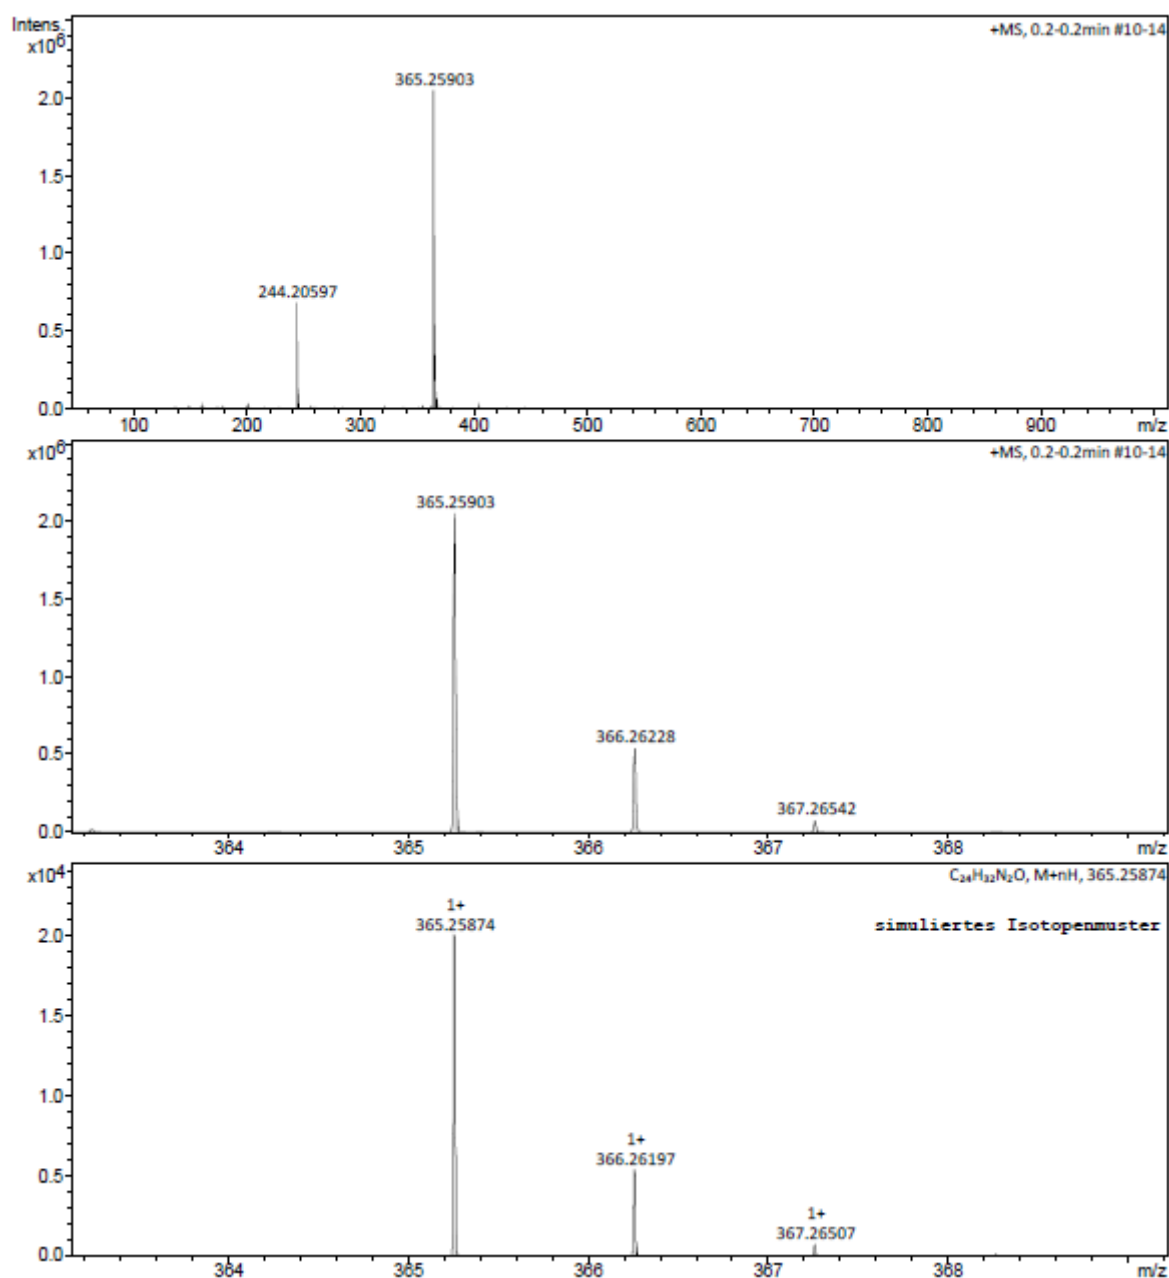

| # | Meas. m/z | Ion Formula                                      | m/z       | Sum Formula                                      | err  [mDa] | err [ppm] | e <sup>-</sup> Conf | Adduct |
|---|-----------|--------------------------------------------------|-----------|--------------------------------------------------|------------|-----------|---------------------|--------|
| 1 | 365.25903 | C <sub>24</sub> H <sub>33</sub> N <sub>2</sub> O | 365.25874 | C <sub>24</sub> H <sub>32</sub> N <sub>2</sub> O | 0.29       | -0.81     | even                | M+H    |

Figure S64: HRMS of *N'*-(1-(2,4,6-triisopropylphenyl)ethylidene)benzohydrazide (6i).

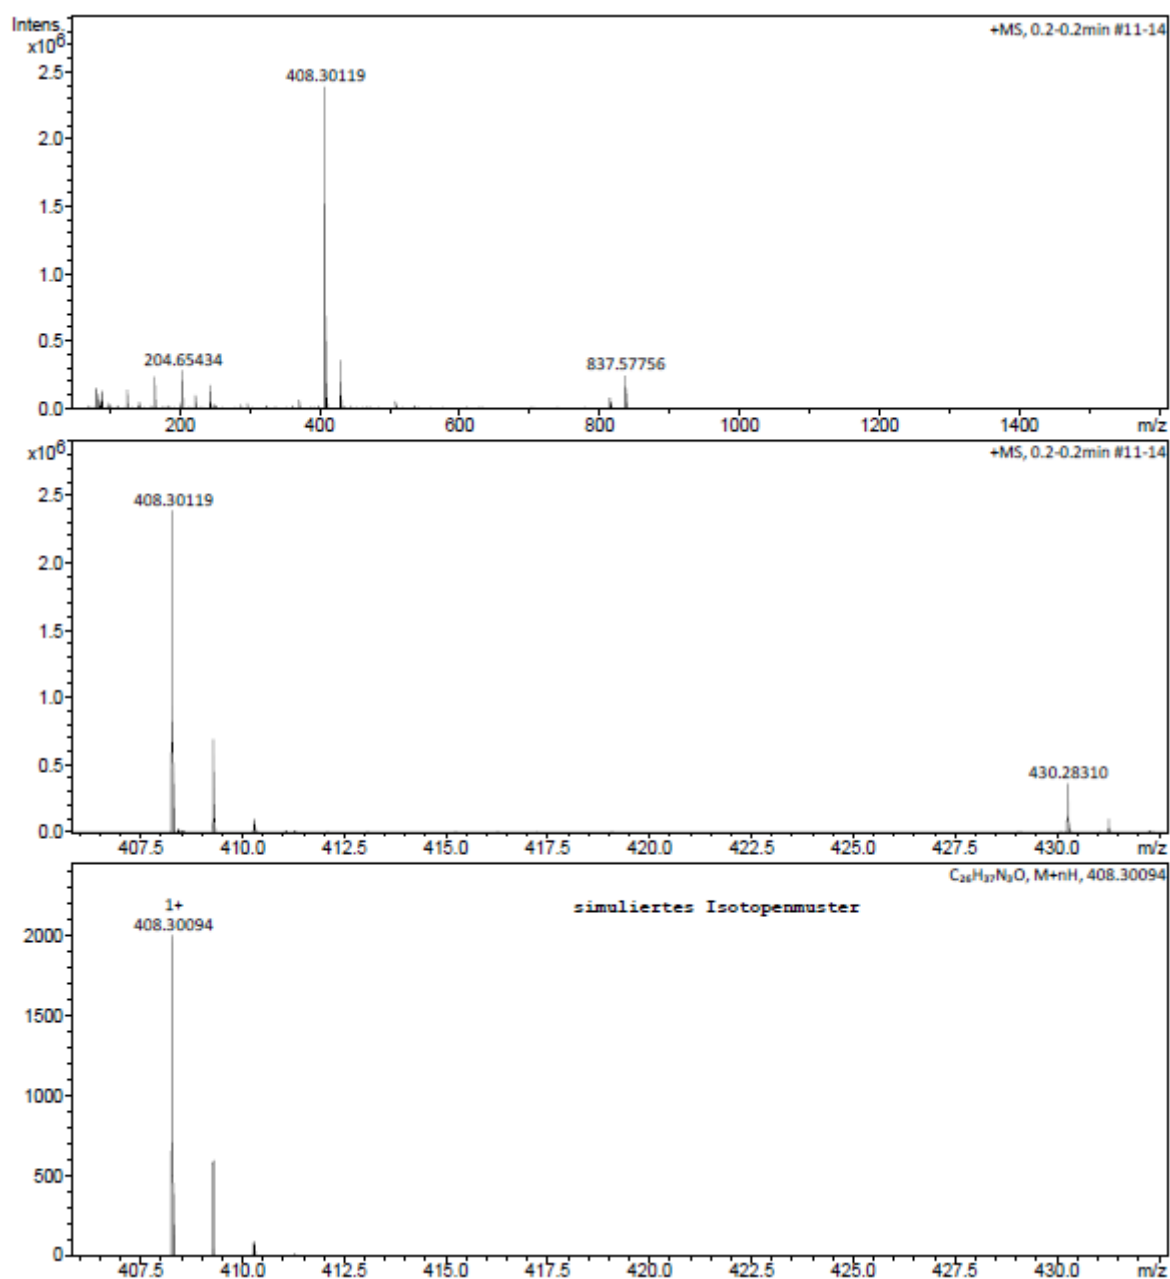

| # | Meas. m/z | Ion Formula                                                     | m/z       | Sum Formula                                      | err  [mDa] | err [ppm] | e <sup>-</sup> | Conf | Adduct |
|---|-----------|-----------------------------------------------------------------|-----------|--------------------------------------------------|------------|-----------|----------------|------|--------|
| 1 | 408.30119 | C <sub>26</sub> H <sub>38</sub> N <sub>3</sub> O                | 408.30094 | C <sub>26</sub> H <sub>37</sub> N <sub>3</sub> O | 0.25       | -0.61     | even           |      | M+H    |
| 1 | 430.28310 | C <sub>26</sub> H <sub>37</sub> N <sub>3</sub> NaO              | 430.28288 | C <sub>26</sub> H <sub>37</sub> N <sub>3</sub> O | 0.21       | -0.49     | even           |      | M+Na   |
| 1 | 815.59513 | C <sub>52</sub> H <sub>75</sub> N <sub>6</sub> O <sub>2</sub>   | 815.59460 | C <sub>26</sub> H <sub>37</sub> N <sub>3</sub> O | 0.53       | -0.65     | even           |      | 2M+H   |
| 1 | 837.57756 | C <sub>52</sub> H <sub>74</sub> N <sub>6</sub> NaO <sub>2</sub> | 837.57655 | C <sub>26</sub> H <sub>37</sub> N <sub>3</sub> O | 1.01       | -1.21     | even           |      | 2M+Na  |

Figure S65: HRMS of 4-(dimethylamino)-N'-(1-(2,4,6-triisopropylphenyl)ethylidene)benzohydrazide (6j).

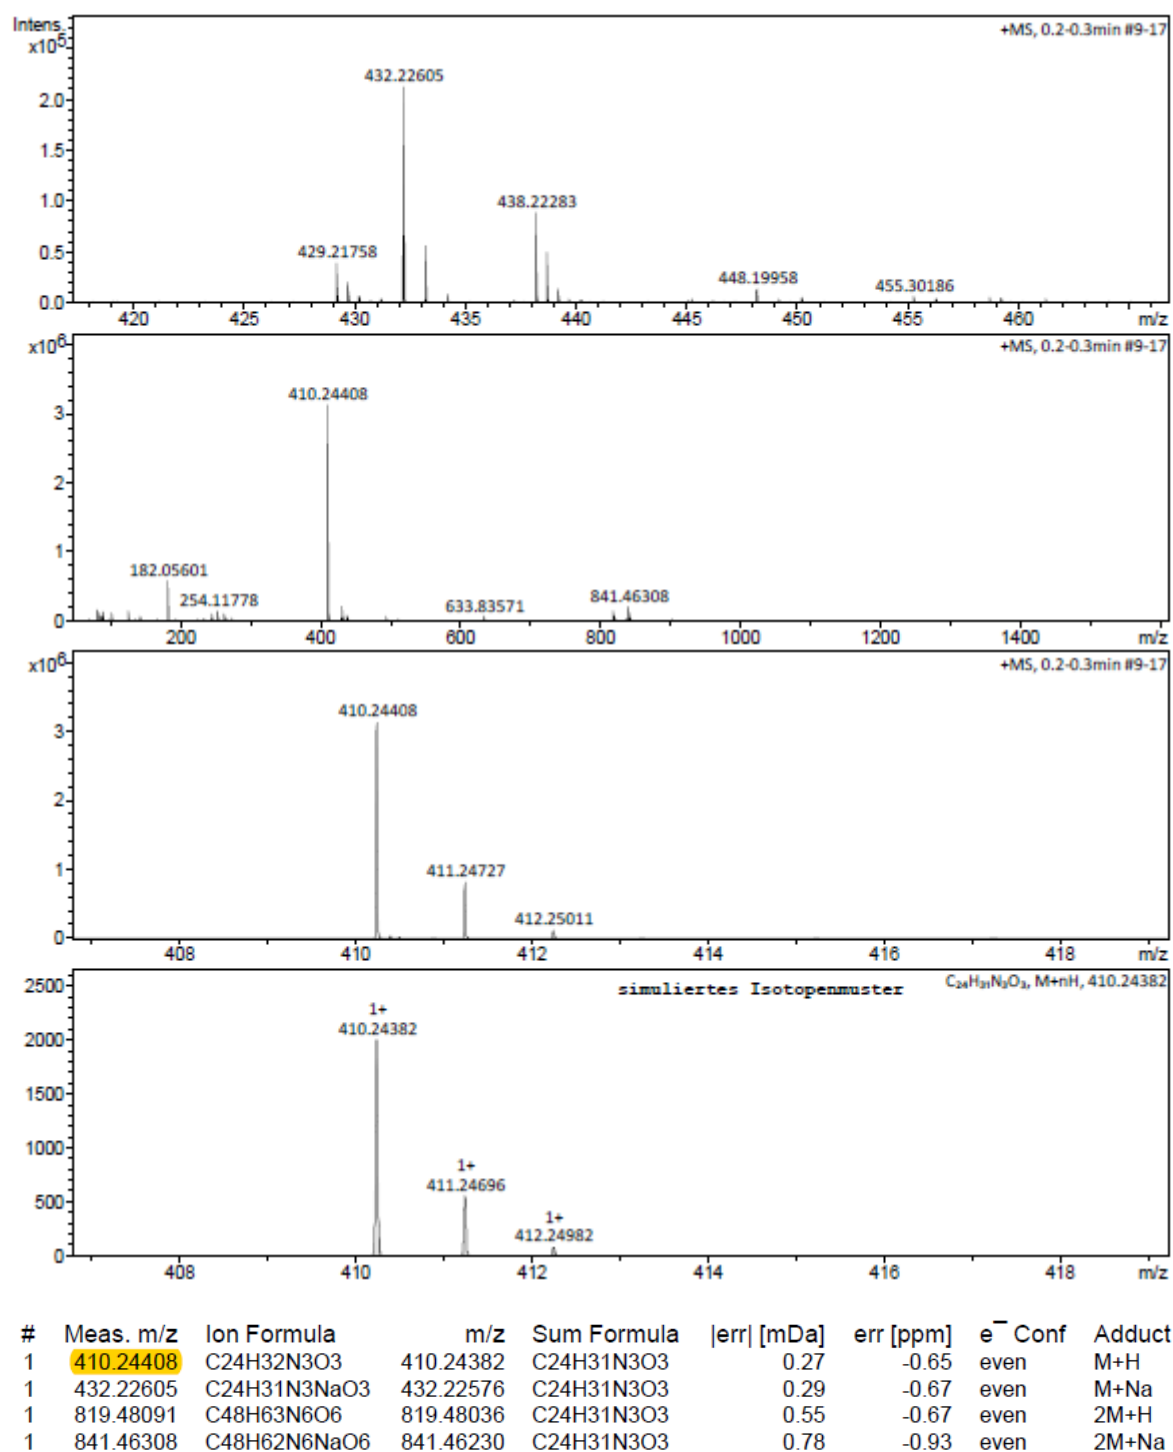

Figure S66: HRMS of 4-nitro-N'-(1-(2,4,6-triisopropylphenyl)ethylidene)benzohydrazide (6k).

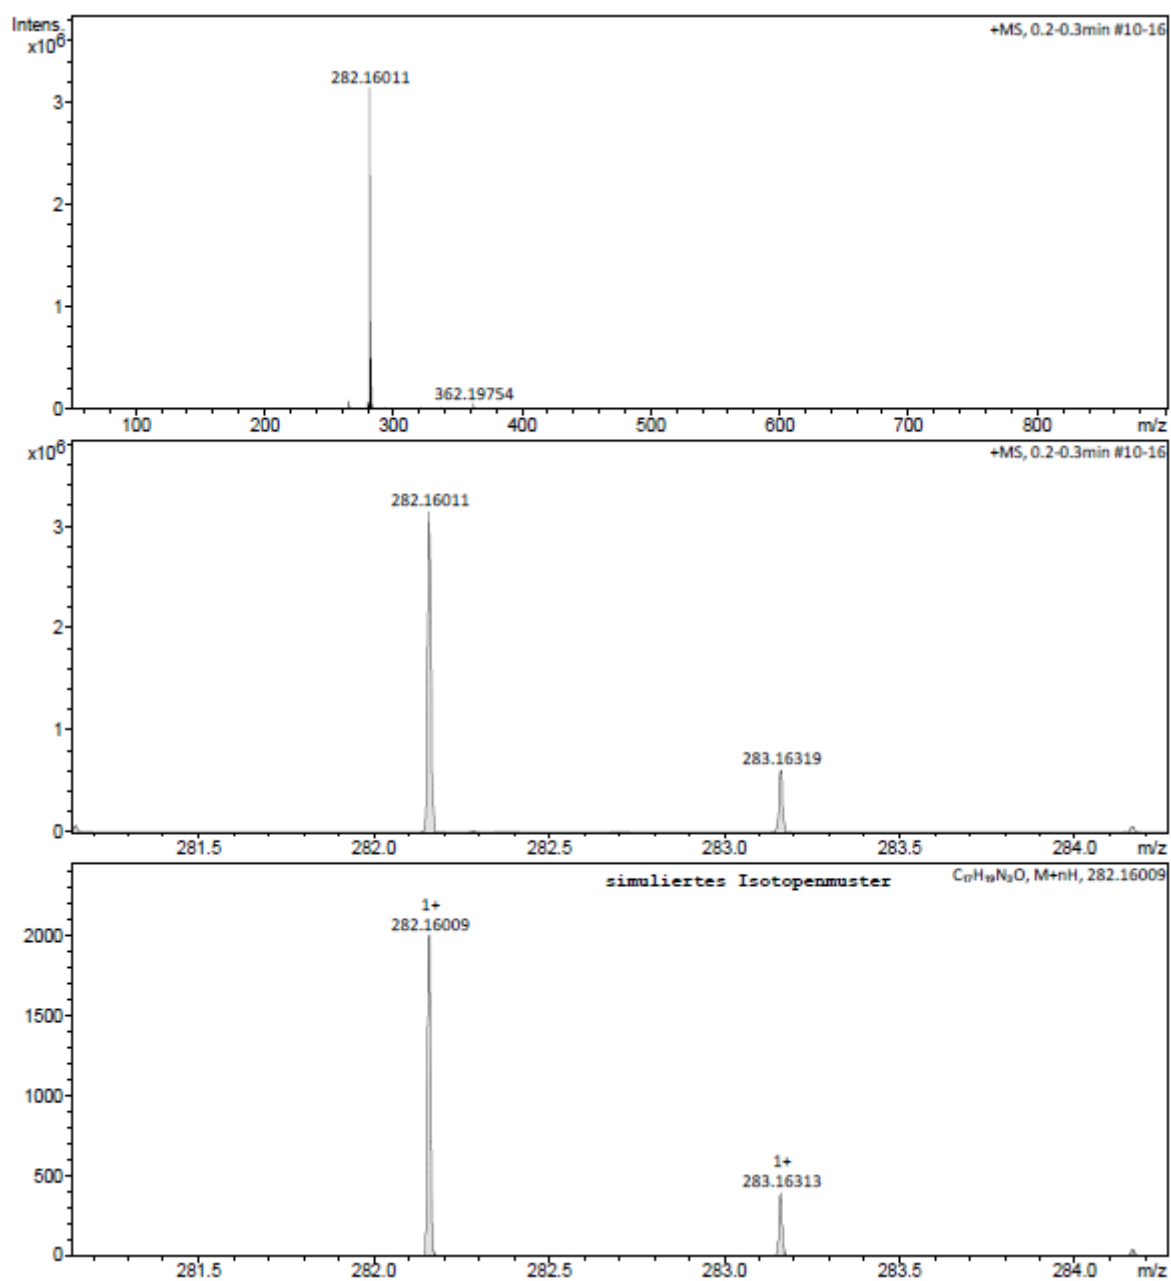

| # | Meas. m/z | Ion Formula                                      | m/z       | Sum Formula                                      | err  [mDa] | err [ppm] | e <sup>-</sup> Conf | Adduct |
|---|-----------|--------------------------------------------------|-----------|--------------------------------------------------|------------|-----------|---------------------|--------|
| 1 | 282.16011 | C <sub>17</sub> H <sub>20</sub> N <sub>3</sub> O | 282.16009 | C <sub>17</sub> H <sub>19</sub> N <sub>3</sub> O | 0.02       | -0.07     | even                | M+H    |

Figure S67: HRMS of *N'*-(1-(4-(dimethylamino)phenyl)ethylidene)benzohydrazide (6I).

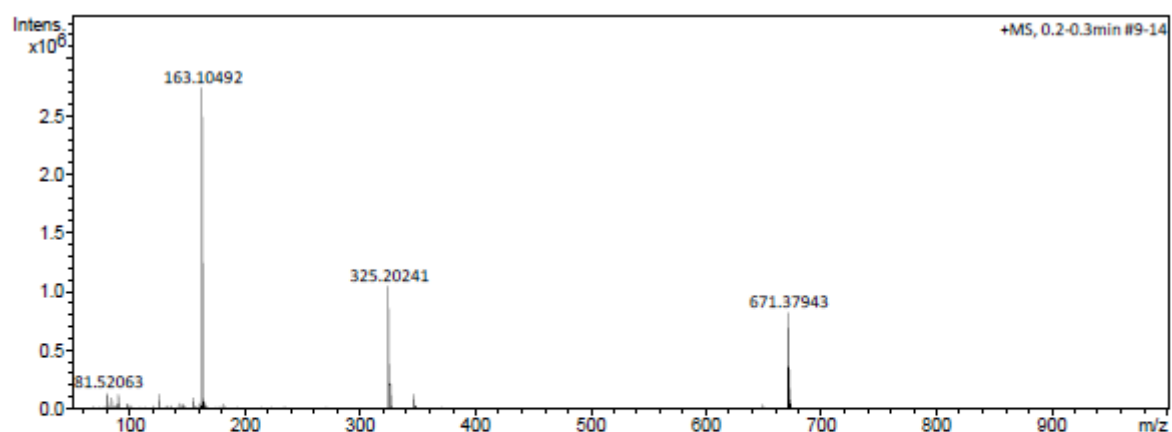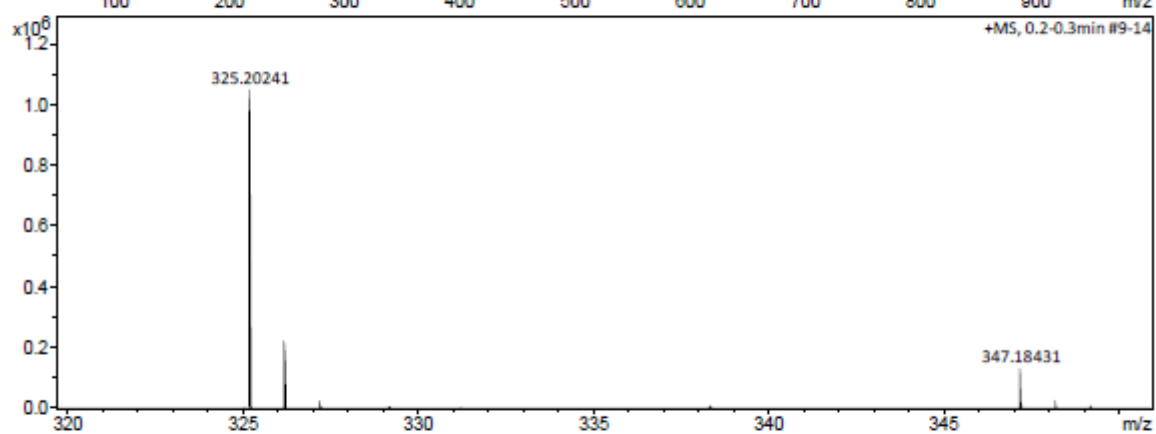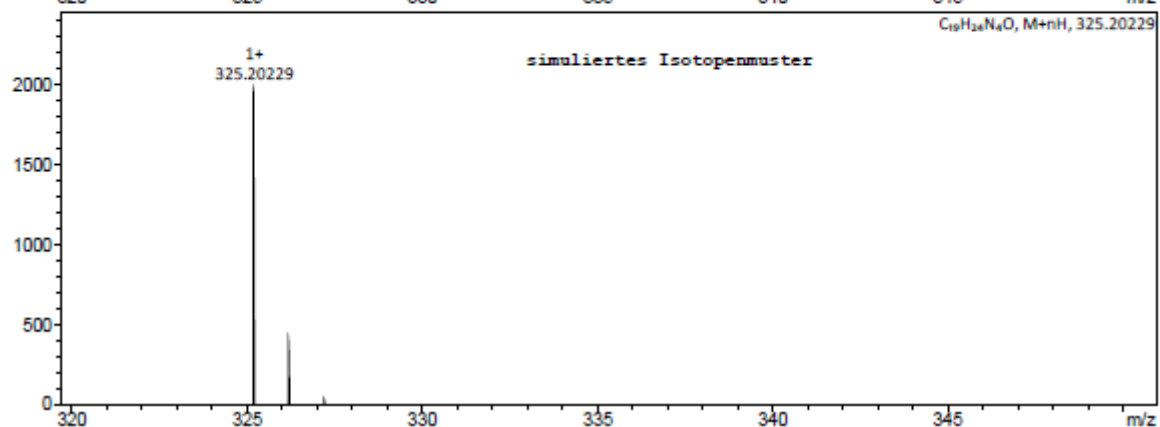

| # | Meas. m/z | Ion Formula  | m/z       | Sum Formula | err  [mDa] | err [ppm] | e <sup>-</sup> Conf | Adduct |
|---|-----------|--------------|-----------|-------------|------------|-----------|---------------------|--------|
| 1 | 325.20241 | C19H25N4O    | 325.20229 | C19H24N4O   | 0.12       | -0.37     | even                | M+H    |
| 1 | 671.37943 | C38H48N8NaO2 | 671.37924 | C19H24N4O   | 0.19       | -0.28     | even                | 2M+Na  |

Figure S68: HRMS of 4-(dimethylamino)-N'-(1-(4-(dimethylamino)phenyl)ethylidene)benzohydrazide (6m).

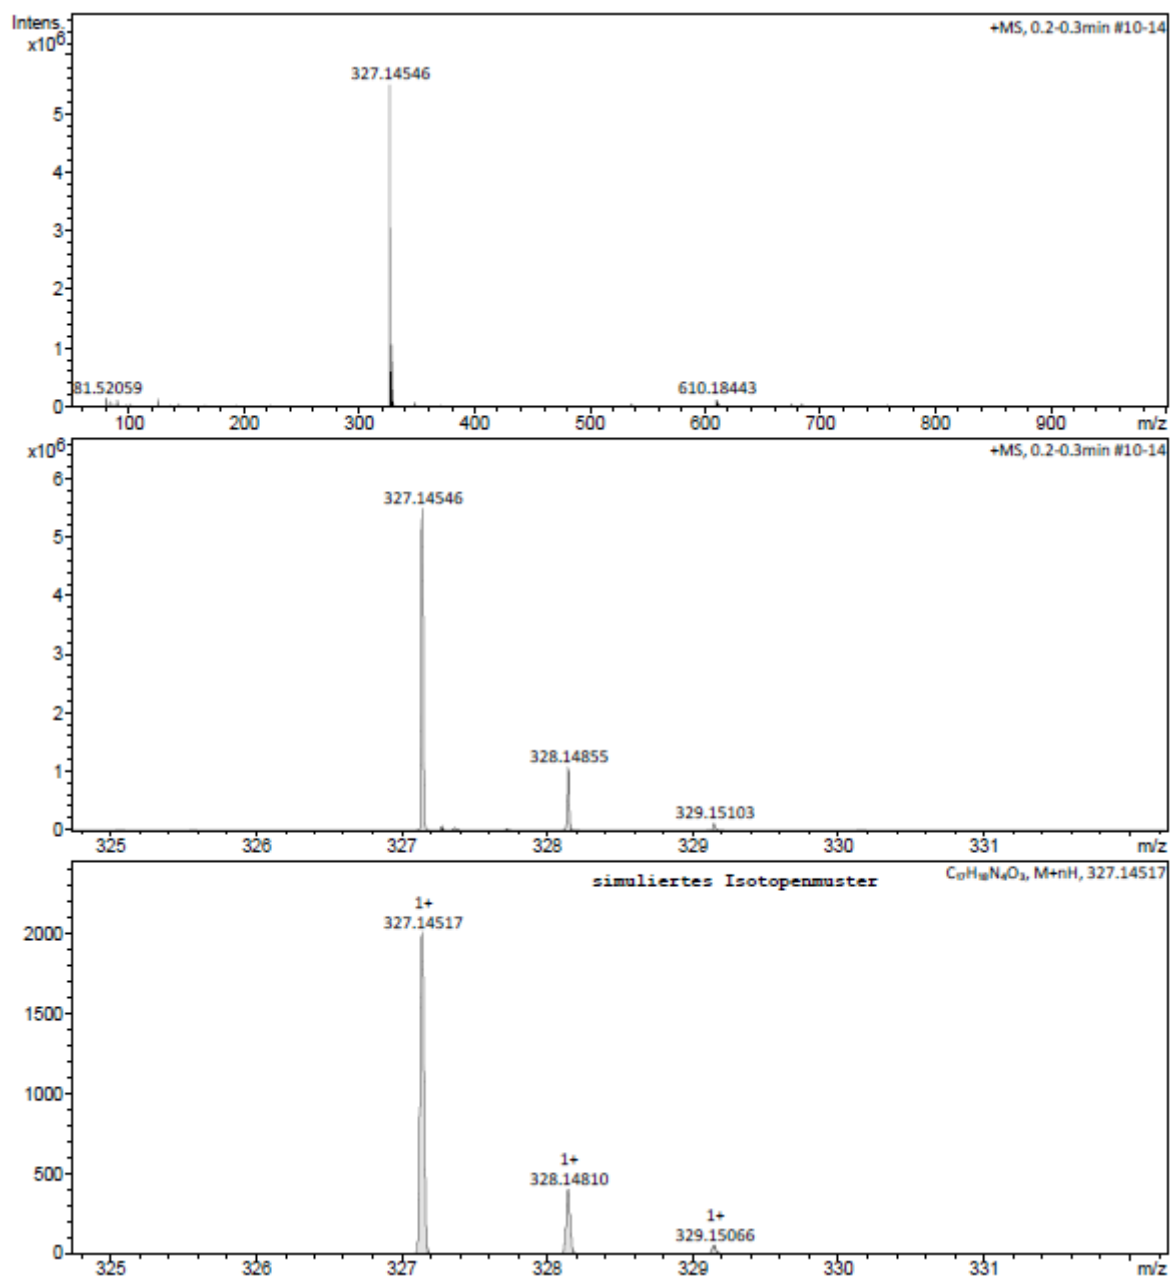

| # | Meas. m/z | Ion Formula                                                   | m/z       | Sum Formula                                                   | err  [mDa] | err [ppm] | e <sup>-</sup> Conf | Adduct |
|---|-----------|---------------------------------------------------------------|-----------|---------------------------------------------------------------|------------|-----------|---------------------|--------|
| 1 | 327.14546 | C <sub>17</sub> H <sub>19</sub> N <sub>4</sub> O <sub>3</sub> | 327.14517 | C <sub>17</sub> H <sub>18</sub> N <sub>4</sub> O <sub>3</sub> | 0.29       | -0.90     | even                | M+H    |

Figure S69: HRMS of 4-nitro-*N'*-(1-(4-(dimethylamino)phenyl)ethylidene)benzohydrazide (6n).



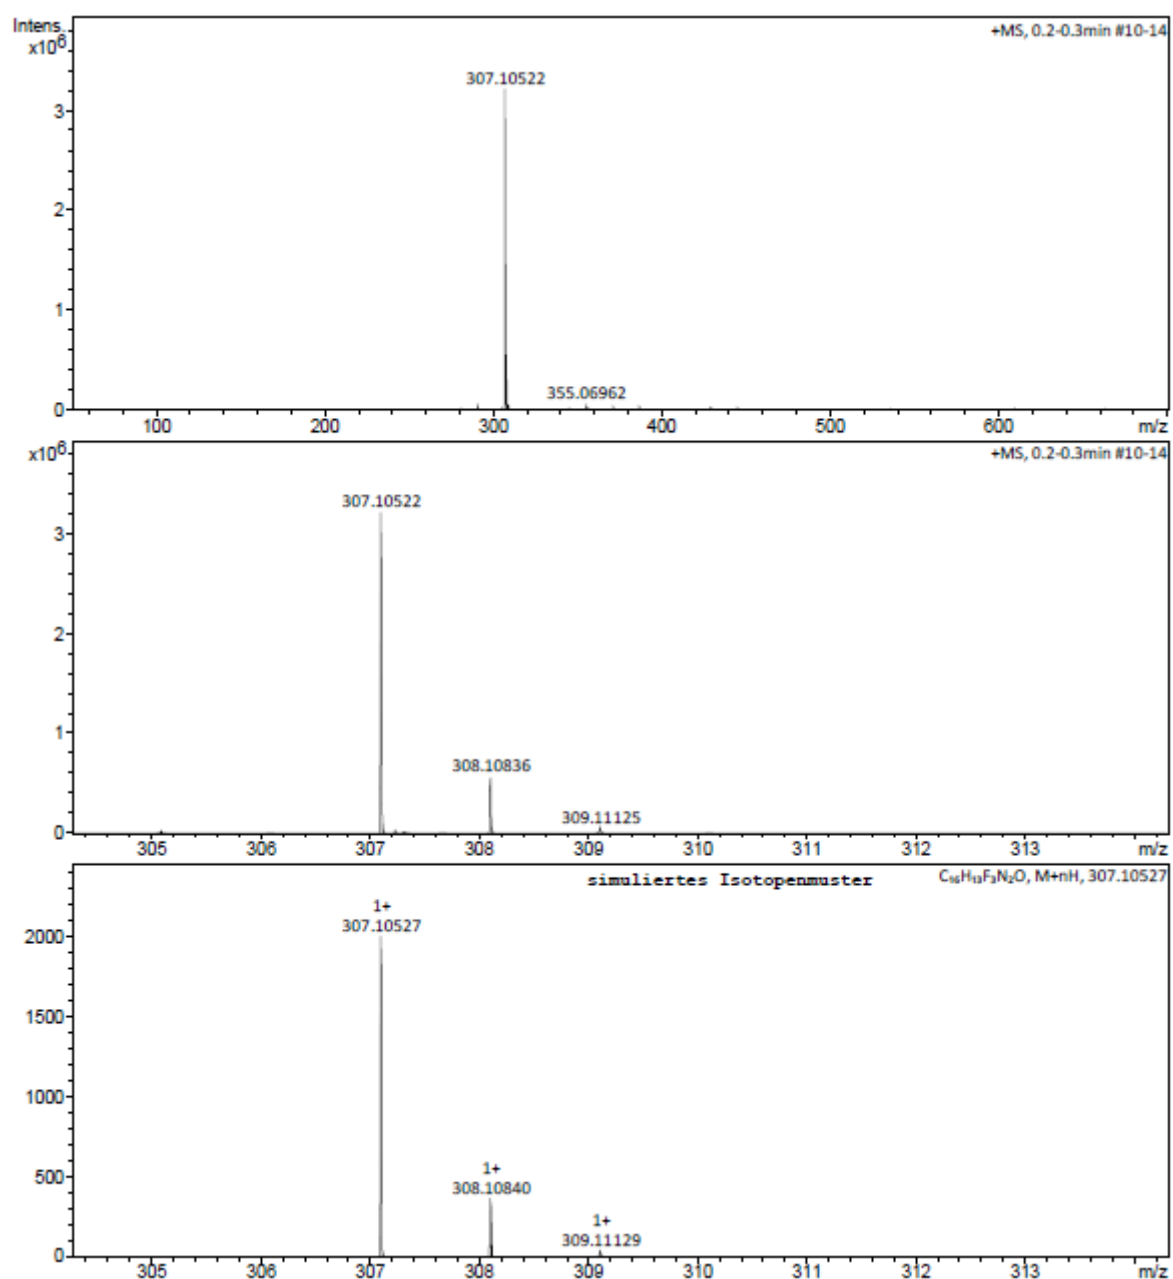

| # | Meas. $m/z$ | Ion Formula           | $m/z$     | Sum Formula           | err  [mDa] | err [ppm] | $e^-$ Conf | Adduct |
|---|-------------|-----------------------|-----------|-----------------------|------------|-----------|------------|--------|
| 1 | 307.10522   | $C_{16}H_{14}F_3N_2O$ | 307.10527 | $C_{16}H_{13}F_3N_2O$ | 0.06       | 0.18      | even       | $M+H$  |

Figure S70: HRMS of *N'*-(1-(4-(trifluoromethyl)phenyl)ethylidene)benzohydrazide (6p).

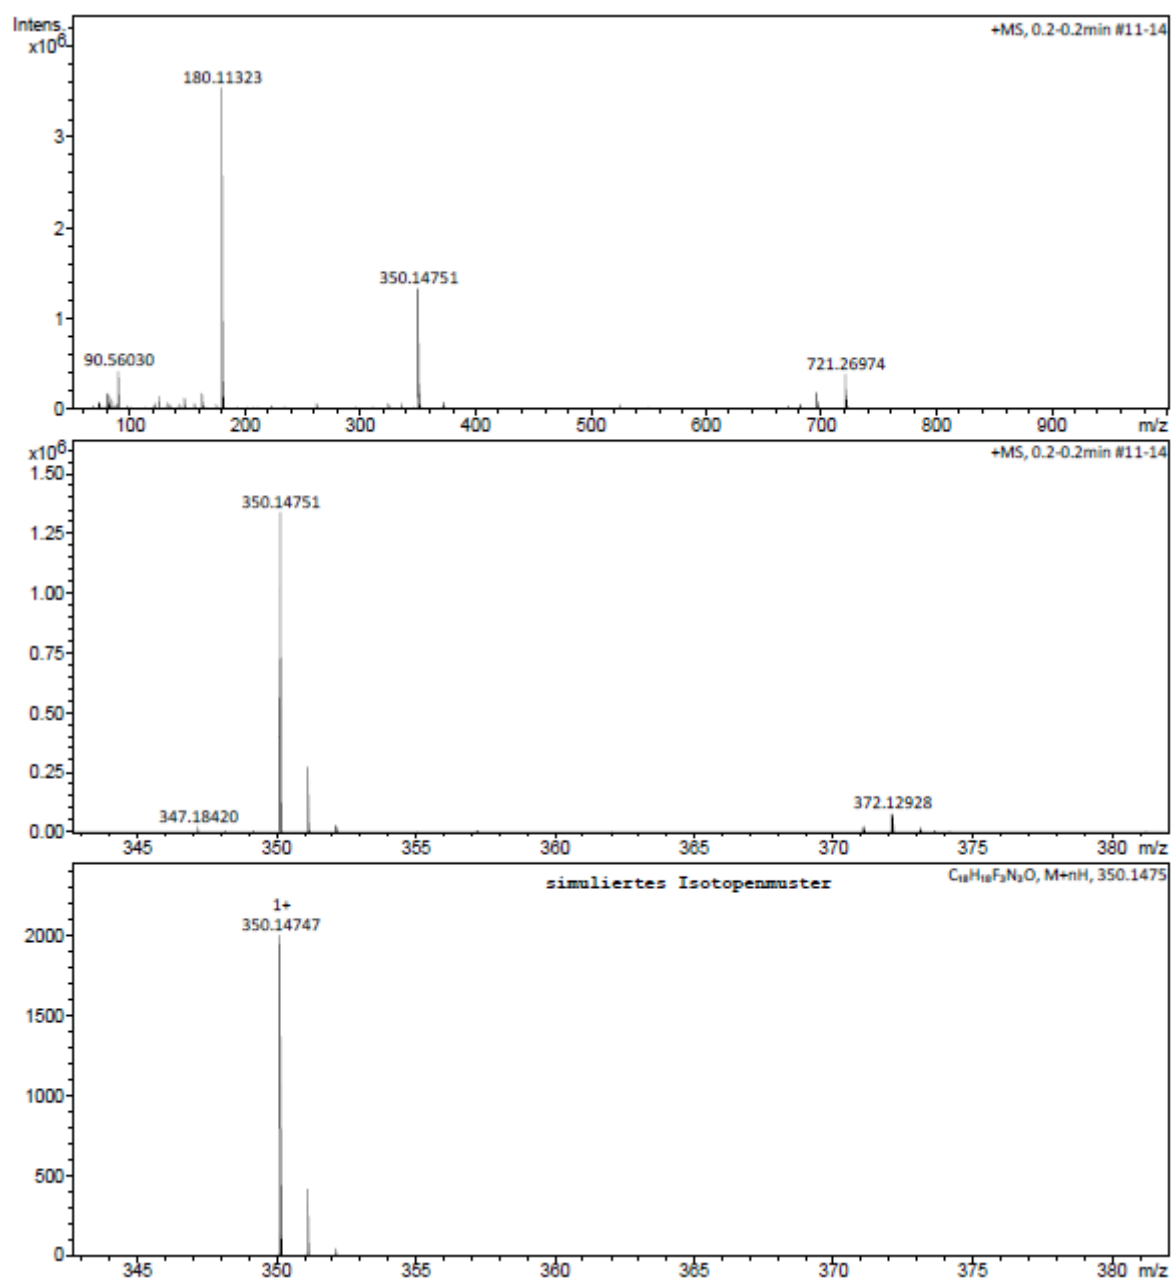

| # | Meas. m/z | Ion Formula                                                                    | m/z       | Sum Formula                                                     | err  [mDa] | err [ppm] | e <sup>-</sup> | Conf | Adduct |
|---|-----------|--------------------------------------------------------------------------------|-----------|-----------------------------------------------------------------|------------|-----------|----------------|------|--------|
| 1 | 350.14751 | C <sub>18</sub> H <sub>19</sub> F <sub>3</sub> N <sub>3</sub> O                | 350.14747 | C <sub>18</sub> H <sub>18</sub> F <sub>3</sub> N <sub>3</sub> O | 0.04       | -0.12     | even           |      | M+H    |
| 1 | 721.26974 | C <sub>36</sub> H <sub>36</sub> F <sub>6</sub> N <sub>6</sub> NaO <sub>2</sub> | 721.26961 | C <sub>18</sub> H <sub>18</sub> F <sub>3</sub> N <sub>3</sub> O | 0.13       | -0.17     | even           |      | 2M+Na  |

Figure S71: HRMS of 4-(dimethylamino)-N'-(1-(4-(trifluoromethyl)phenyl)ethylidene)benzohydrazide (6q).

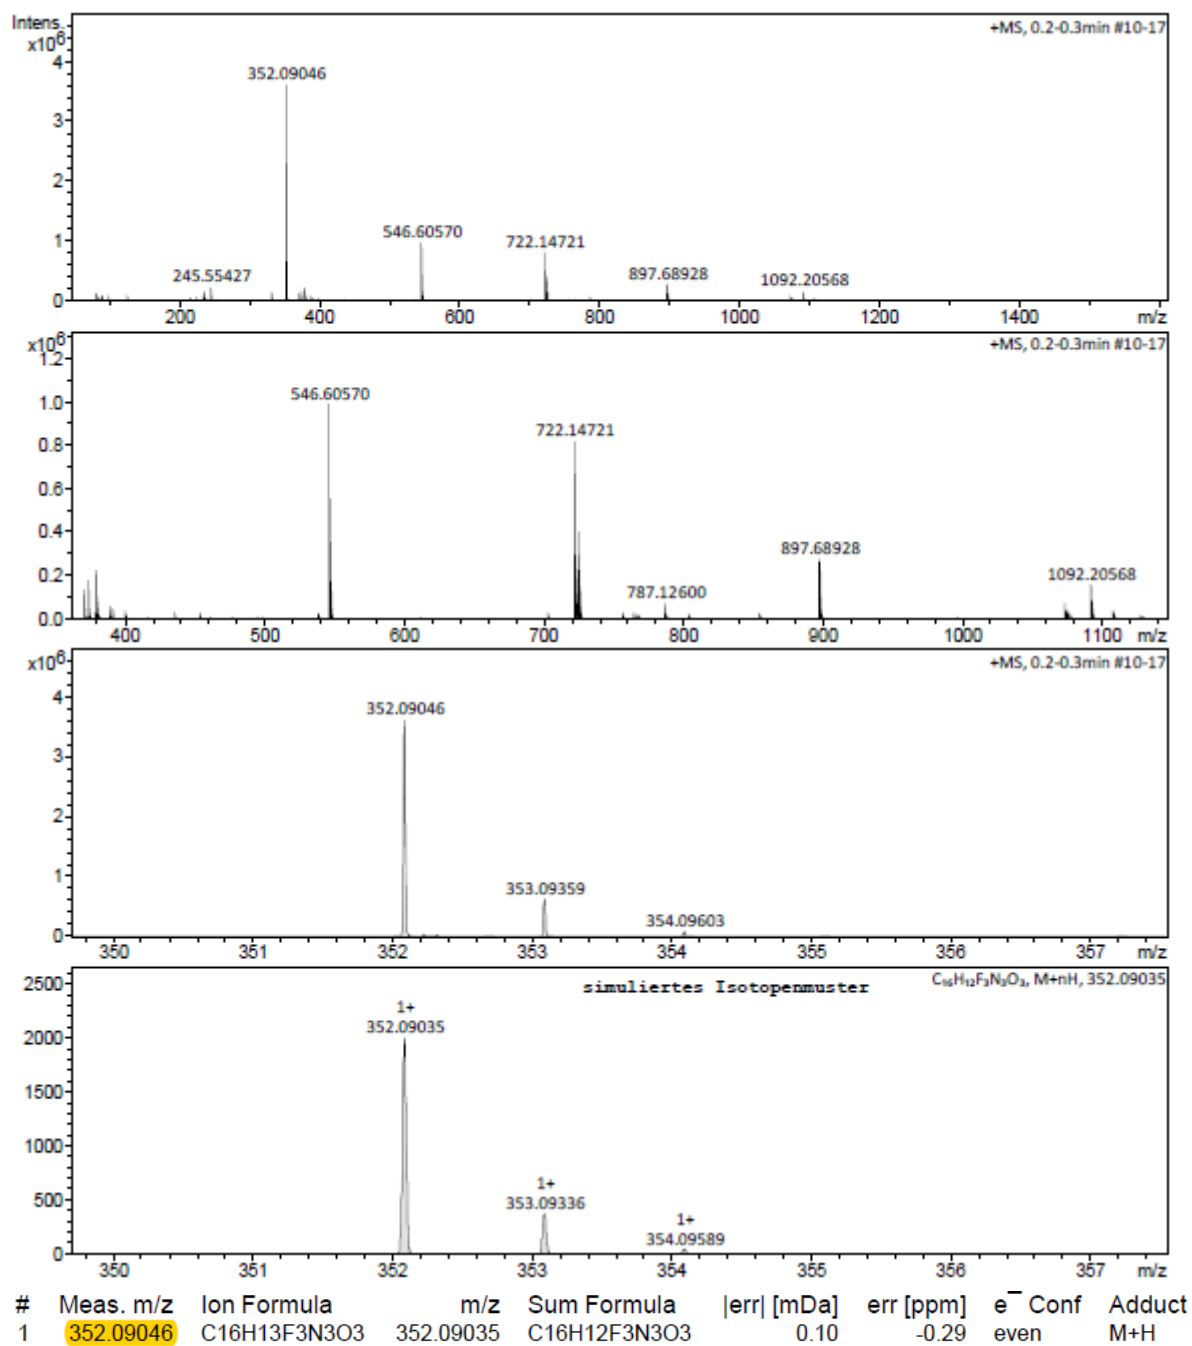

Figure S72: HRMS of 4-nitro-*N'*-(1-(4-(trifluoromethyl)phenyl)ethylidene)benzohydrazide (6r).

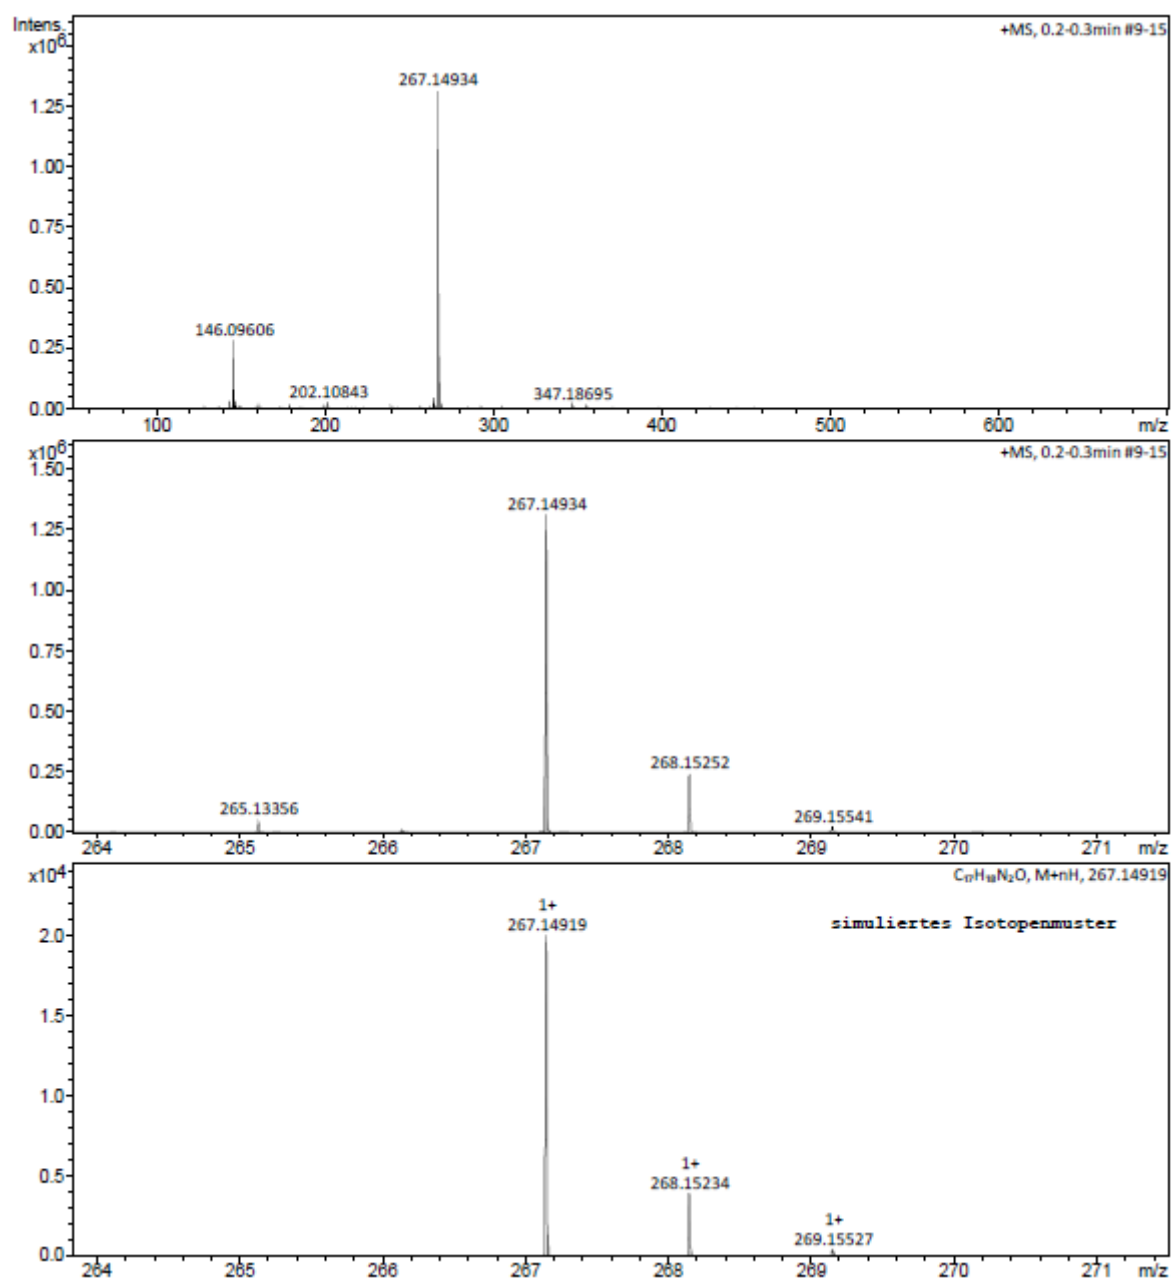

| # | Meas. m/z | Ion Formula                                      | m/z       | Sum Formula                                      | err  [mDa] | err [ppm] | e <sup>-</sup> Conf | Adduct |
|---|-----------|--------------------------------------------------|-----------|--------------------------------------------------|------------|-----------|---------------------|--------|
| 1 | 267.14934 | C <sub>17</sub> H <sub>19</sub> N <sub>2</sub> O | 267.14919 | C <sub>17</sub> H <sub>18</sub> N <sub>2</sub> O | 0.15       | -0.55     | even                | M+H    |

Figure S73: HRMS of *N'*-(1-phenylbutylidene)benzohydrazide and *N'*-(1-phenylbutan-2-ylidene)benzohydrazide (7b).

83734hr final #156-235 RT: 2.93-4.41 AV: 80 NL: 3.61E5  
T: + c EI Full ms [ 314.67-338.68]

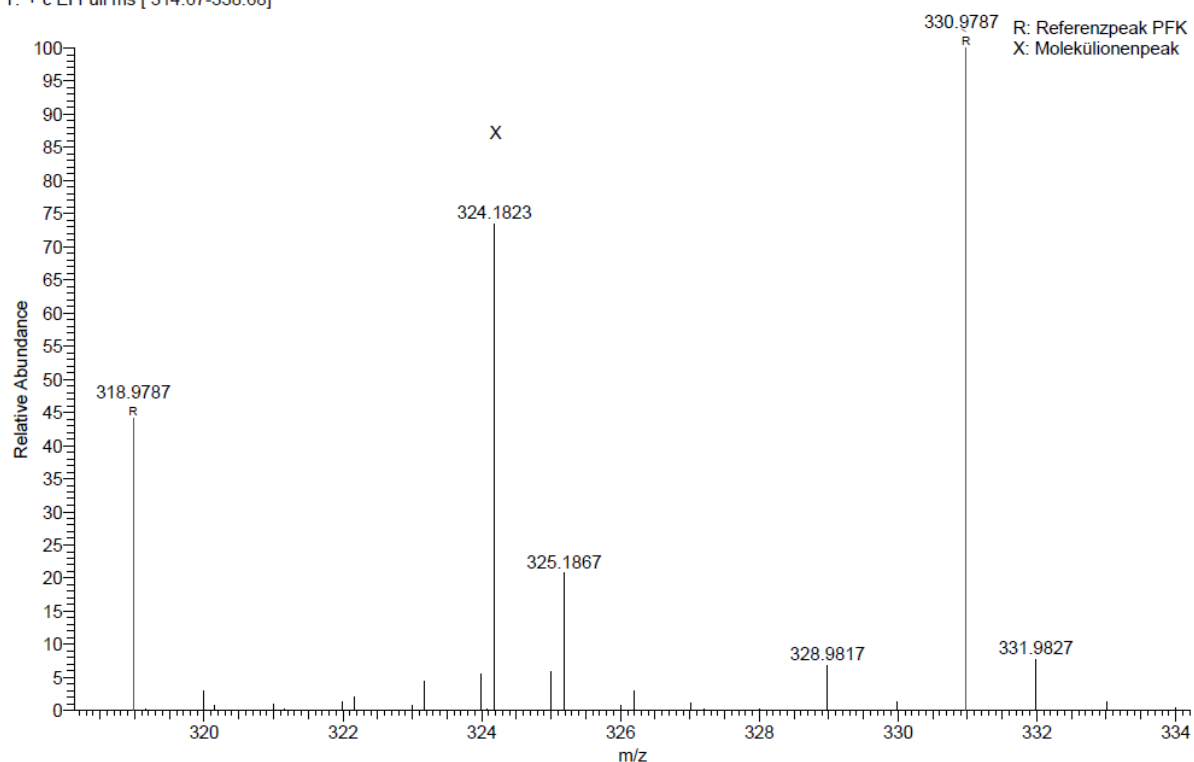

m/z = 319.1823-329.1823

| m/z      | Theo. Mass | Delta (mmu) | RDB equiv. | Composition                                                   |
|----------|------------|-------------|------------|---------------------------------------------------------------|
| 324.1823 | 324.1832   | -0.95       | 10.0       | C <sub>20</sub> H <sub>24</sub> O <sub>2</sub> N <sub>2</sub> |
|          | 324.1792   | 3.07        | 6.0        | C <sub>15</sub> H <sub>24</sub> O <sub>4</sub> N <sub>4</sub> |
|          | 324.1873   | -4.97       | 14.0       | C <sub>25</sub> H <sub>24</sub>                               |

Figure S74: HRMS of *N'*-(1-(3-methoxyphenyl)hexylidene)benzohydrazide and *N'*-(1-(3-methoxyphenyl)hexan-2-ylidene)benzohydrazide (7c).

83735hr final #140-144 RT: 3.54-3.64 AV: 5 NL: 1.40E5  
T: + c EI Full ms [ 350.61-388.62]

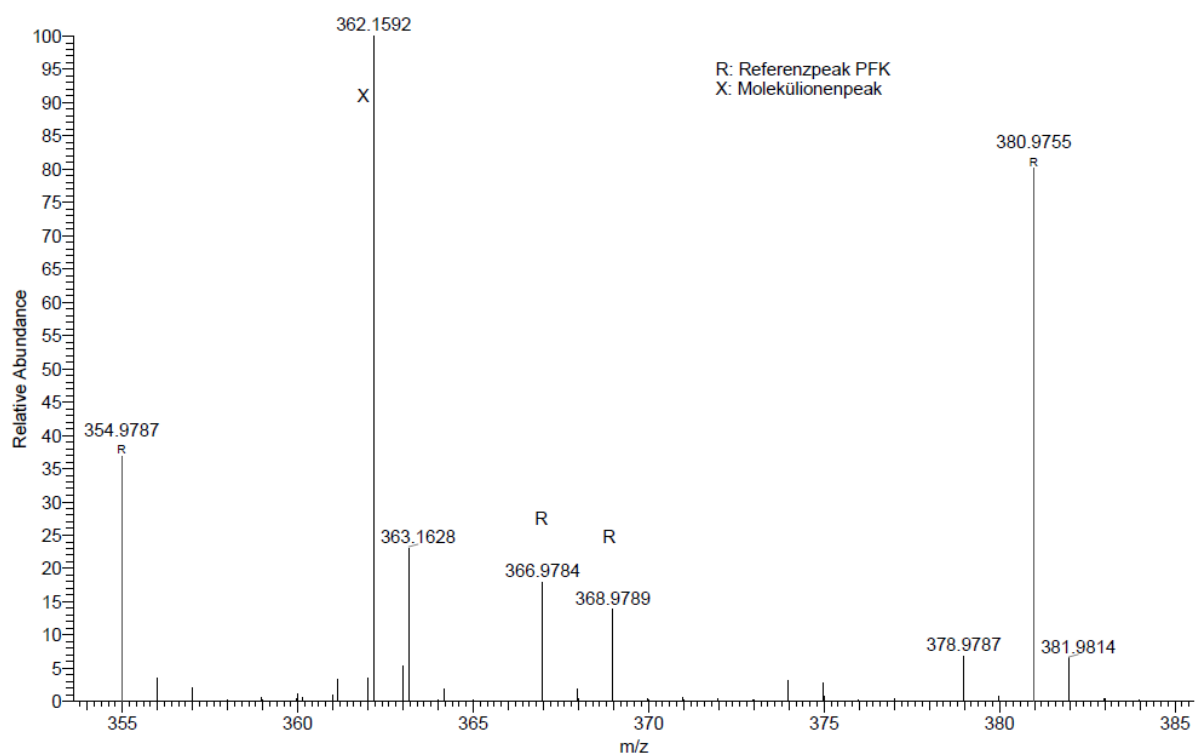

m/z = 357.1592-367.1592

| m/z      | Theo. Mass | Delta (mmu) | RDB equiv. | Composition                                                                  |
|----------|------------|-------------|------------|------------------------------------------------------------------------------|
| 362.1592 | 362.1600   | -0.85       | 10.0       | C <sub>20</sub> H <sub>21</sub> O <sub>1</sub> N <sub>2</sub> F <sub>3</sub> |
|          | 362.1562   | 2.97        | 9.5        | C <sub>20</sub> H <sub>22</sub> O <sub>3</sub> N <sub>1</sub> F <sub>2</sub> |
|          | 362.1560   | 3.17        | 6.0        | C <sub>15</sub> H <sub>21</sub> O <sub>3</sub> N <sub>4</sub> F <sub>3</sub> |
|          | 362.1549   | 4.32        | 10.0       | C <sub>18</sub> H <sub>20</sub> O <sub>2</sub> N <sub>4</sub> F <sub>2</sub> |

Figure S75: HRMS of *N'*-(1-(3-(trifluoromethyl)phenyl)hexylidene)benzohydrazide and *N'*-(1-(3-(trifluoromethyl)phenyl)hexan-2-ylidene)benzohydrazide (7d).

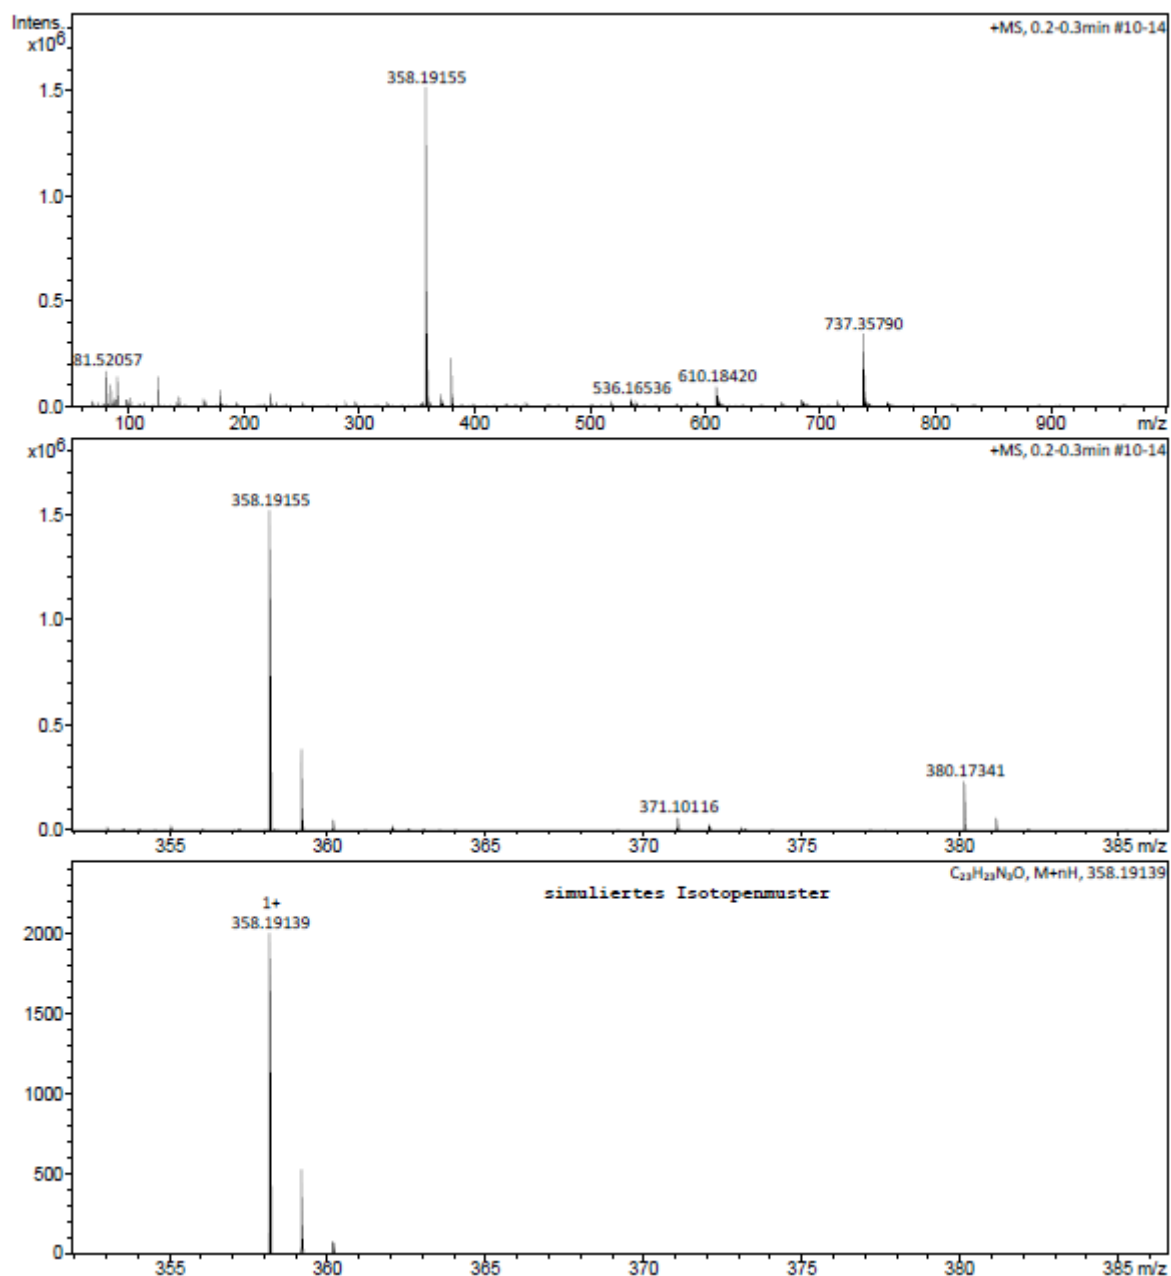

| # | Meas. m/z | Ion Formula                                                     | m/z       | Sum Formula                                      | err  [mDa] | err [ppm] | e <sup>-</sup> Conf | Adduct |
|---|-----------|-----------------------------------------------------------------|-----------|--------------------------------------------------|------------|-----------|---------------------|--------|
| 1 | 358.19155 | C <sub>23</sub> H <sub>24</sub> N <sub>3</sub> O                | 358.19139 | C <sub>23</sub> H <sub>23</sub> N <sub>3</sub> O | 0.16       | -0.44     | even                | M+H    |
| 1 | 737.35790 | C <sub>46</sub> H <sub>46</sub> N <sub>6</sub> NaO <sub>2</sub> | 737.35745 | C <sub>23</sub> H <sub>23</sub> N <sub>3</sub> O | 0.45       | -0.61     | even                | 2M+Na  |

Figure S76: HRMS of 4-(dimethylamino)-N'-(1,2-diphenylethylidene)benzohydrazide (7f).

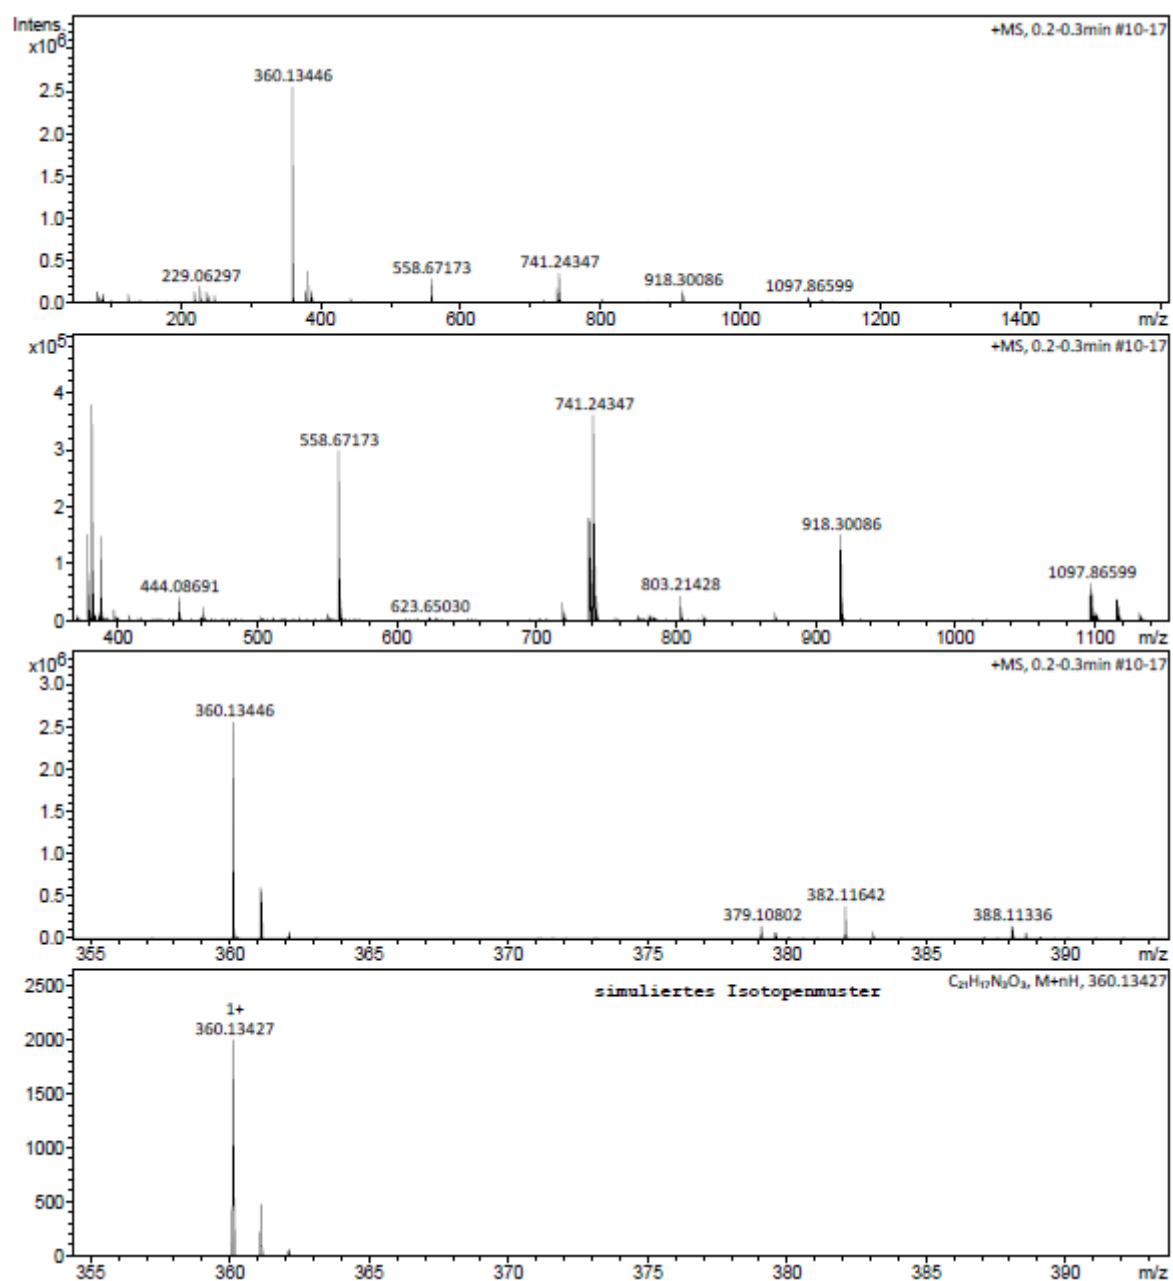

| # | Meas. m/z | Ion Formula                                                     | m/z       | Sum Formula                                                   | err  [mDa] | err [ppm] | e <sup>-</sup> | Conf | Adduct |
|---|-----------|-----------------------------------------------------------------|-----------|---------------------------------------------------------------|------------|-----------|----------------|------|--------|
| 1 | 360.13446 | C <sub>21</sub> H <sub>18</sub> N <sub>3</sub> O <sub>3</sub>   | 360.13427 | C <sub>21</sub> H <sub>17</sub> N <sub>3</sub> O <sub>3</sub> | 0.19       | -0.53     | even           |      | M+H    |
| 1 | 382.11642 | C <sub>21</sub> H <sub>17</sub> N <sub>3</sub> NaO <sub>3</sub> | 382.11621 | C <sub>21</sub> H <sub>17</sub> N <sub>3</sub> O <sub>3</sub> | 0.21       | -0.54     | even           |      | M+Na   |
| 1 | 741.24347 | C <sub>42</sub> H <sub>34</sub> N <sub>6</sub> NaO <sub>6</sub> | 741.24320 | C <sub>21</sub> H <sub>17</sub> N <sub>3</sub> O <sub>3</sub> | 0.26       | -0.36     | even           |      | 2M+Na  |

Figure S77: HRMS of 4-nitro-N'-(1,2-diphenylethylidene)benzohydrazide (7g).



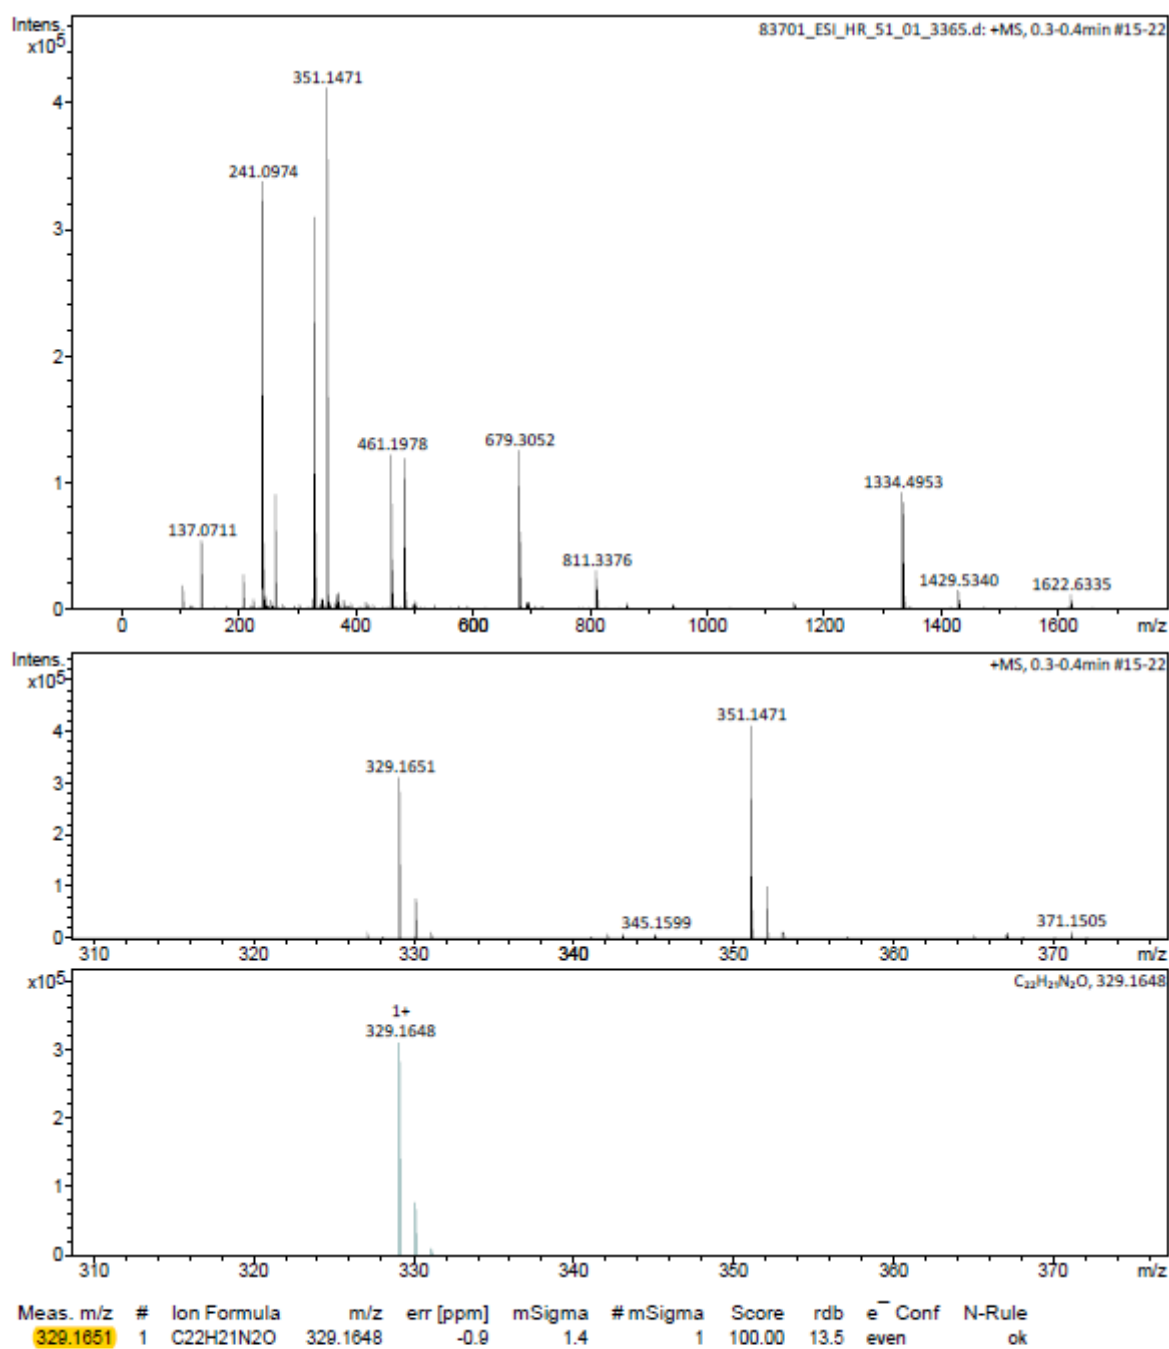

Figure S78: HRMS of *N'*-(1-phenyl-2-(*o*-tolyl)ethylidene)benzohydrazide (7h).

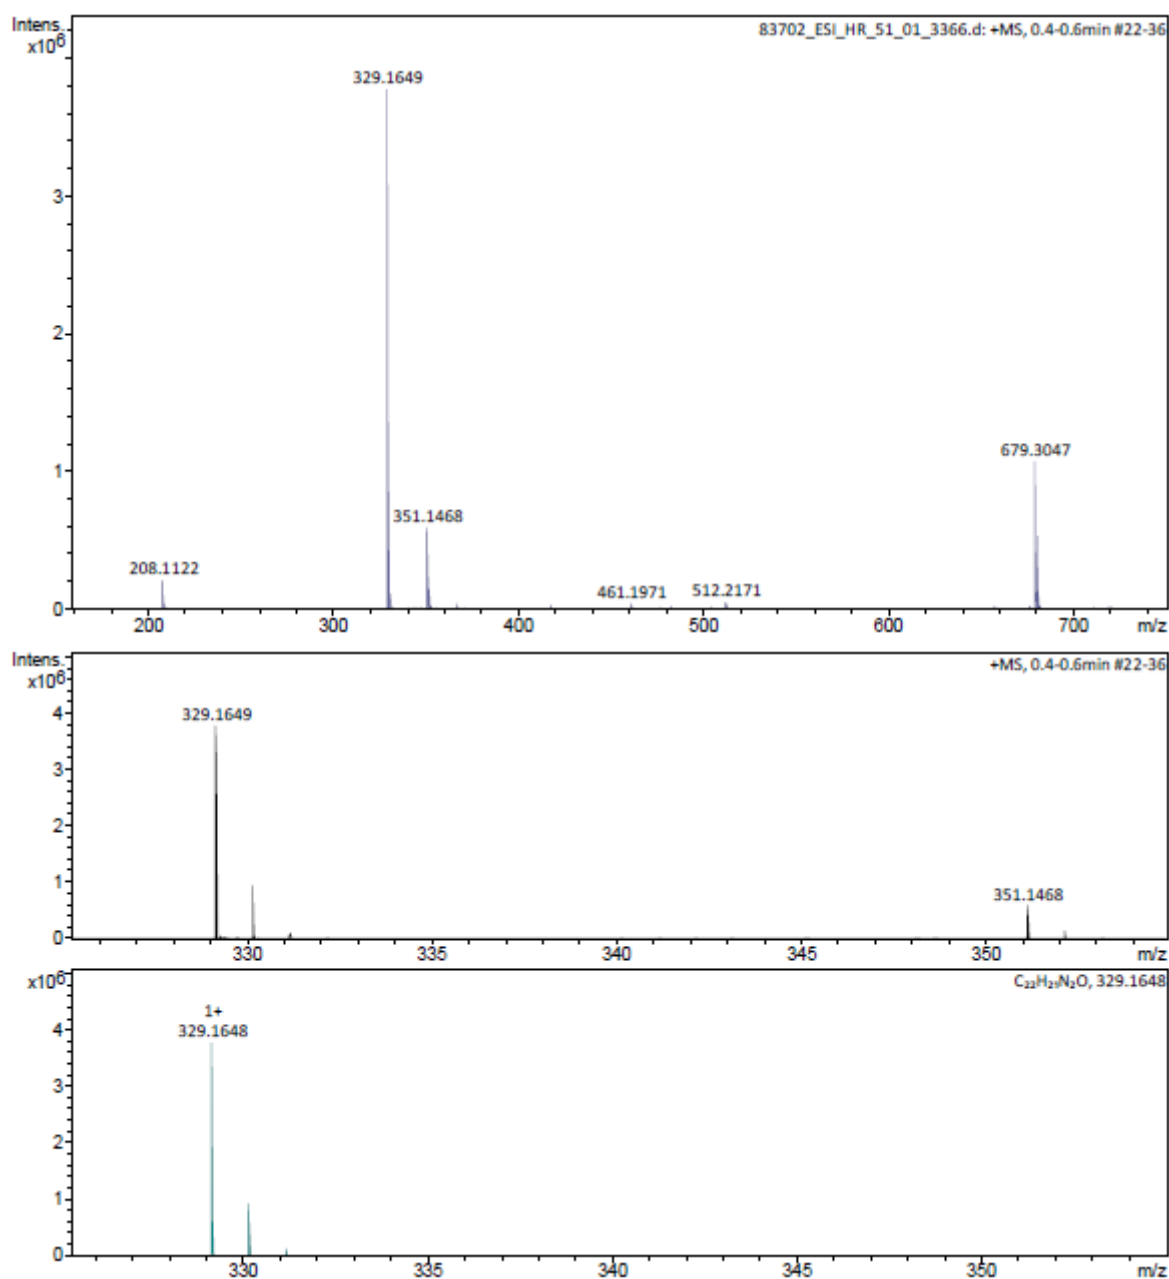

| Meas. m/z | # | Ion Formula                                        | m/z      | err [ppm] | mSigma | # mSigma | Score  | rdB  | e <sup>-</sup> Conf | N-Rule |
|-----------|---|----------------------------------------------------|----------|-----------|--------|----------|--------|------|---------------------|--------|
| 329.1649  | 1 | C <sub>22</sub> H <sub>21</sub> N <sub>2</sub> O   | 329.1648 | -0.0      | 0.7    | 1        | 100.00 | 13.5 | even                | ok     |
| 351.1468  | 1 | C <sub>22</sub> H <sub>20</sub> N <sub>2</sub> NaO | 351.1468 | -0.0      | 4.4    | 1        | 100.00 | 13.5 | even                | ok     |

Figure S79: HRMS of *N'*-(2-phenyl-1-(*m*-tolyl)ethylidene)benzohydrazide and *N'*-(1-phenyl-2-(*m*-tolyl)ethylidene)-benzohydrazide (7i).

83733hr final #175-207 RT: 4.05-4.79 AV: 33 NL: 1.93E5  
T: + c EI Full ms [ 327.63-359.63]

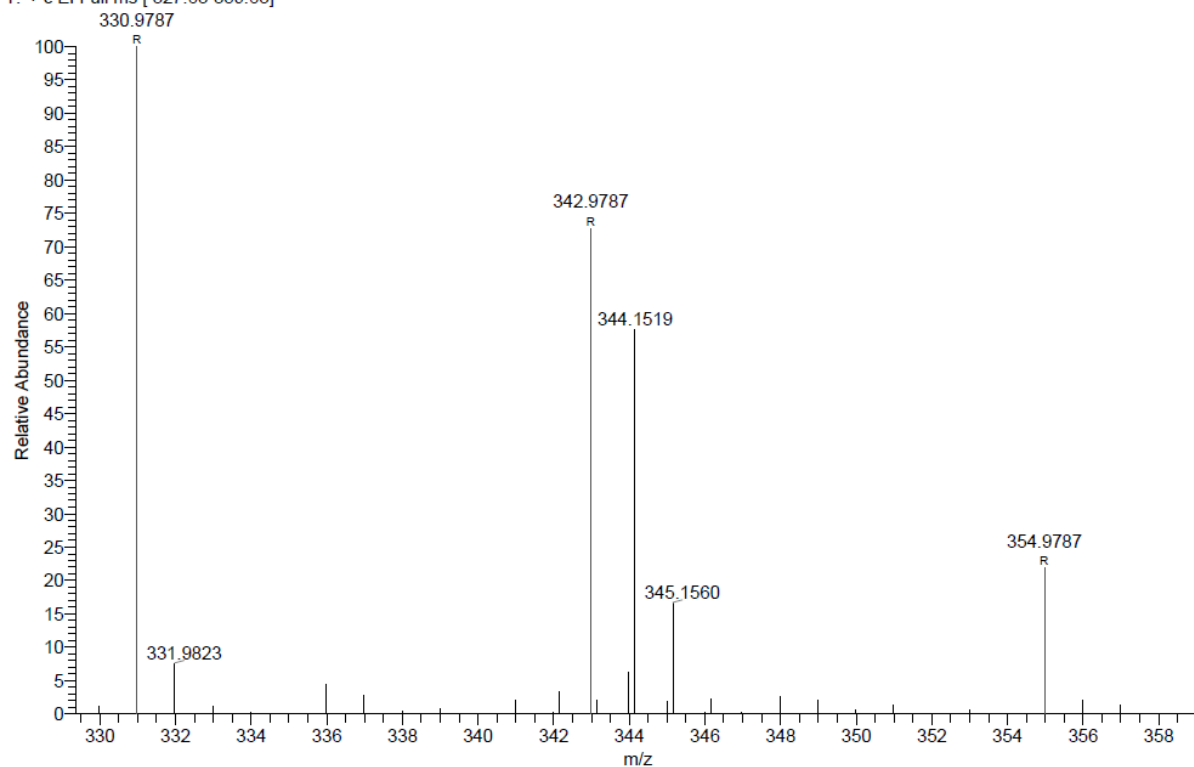

m/z = 339.1519-349.1519

| m/z      | Theo. Mass | Delta (mmu) | RDB equiv. | Composition                                                   |
|----------|------------|-------------|------------|---------------------------------------------------------------|
| 344.1519 | 344.1519   | -0.05       | 14.0       | C <sub>22</sub> H <sub>20</sub> O <sub>2</sub> N <sub>2</sub> |
|          | 344.1479   | 3.97        | 10.0       | C <sub>17</sub> H <sub>20</sub> O <sub>4</sub> N <sub>4</sub> |

Figure S80: HRMS of *N'*-(1-(3-methoxyphenyl)-2-phenylethylidene)benzohydrazide and *N'*-(2-(3-methoxyphenyl)-1-phenylethylidene)benzohydrazide (7j).

## 4. Gas chromatographic measurements

A chromatograph with a split/splitless injector system and a flame ionization detector was used. Chromatographic separation was performed by using a 15 m × 250 µm Varian CP-Sil 8 CB column (df = 1.0 µm) and nitrogen was used as carrier gas at a flow rate of 1.11 mL/min. All injections were carried out in the split flow mode with a split ratio of 7.6:1. The injector was maintained at a temperature of 200 °C and the detector at 270 °C. Quantification was accomplished by using mesitylene as internal standard. The concentration of the standard was equal to each of the substrates in the screening reactions.

The following ramping method was used for all substrate measurements: 3 min hold at 60 °C, 25°C/min heating to 300 °C, then hold at 300 °C for 6 min. (18.6 min total runtime).

**Table S1:** Retention times of all substrates and the internal standard

| Compound class    | Compound name                                | Retention time / min |
|-------------------|----------------------------------------------|----------------------|
| Alkynes           | 1-Octyne                                     | 4.50                 |
|                   | Cyclohexylacetylene                          | 4.79                 |
|                   | <i>t</i> -Butylacetylene                     | 1.15                 |
|                   | Phenylacetylene                              | 5.01                 |
|                   | Mesitylacetylene                             | 7.81                 |
|                   | 2,4,6-Triisopropylphenylacetylene            | 9.79                 |
|                   | 4-Dimethylaminophenylacetylene               | 9.26                 |
|                   | 4-Methoxyphenylacetylene                     | 7.67                 |
|                   | 4-Trifluormethylphenylacetylene              | 5.21                 |
|                   | 1-Phenyl-1-butyne                            | 7.70                 |
|                   | 1-(Hex-1-yn-1-yl)-3-methoxybenzene           | 9.61                 |
|                   | 1-(Hex-1-yn-1-yl)-3-(trifluoromethyl)benzene | 9.81                 |
|                   | Diphenylacetylene                            | 10.31                |
|                   | 1-Methyl-2-(phenylethynyl)benzene            | 10.72                |
|                   | 1-Methyl-3-(phenylethynyl)benzene            | 10.87                |
|                   | 1-Methyl-4-(phenylethynyl)benzene            | 10.92                |
|                   | 1-Methoxy-3-(phenylethynyl)benzene           | 11.30                |
| Internal standard | Mesitylene                                   | 6.12                 |

Benzhydrazides and benzhydrazones could not be observed via GC due to low volatility.

## 5. References

- [1] S. G. Weber, F. Rominger, B. F. Straub, *Eur. J. Inorg. Chem*, **2012**, 17, 2863–2867.
- [2] S. G. Weber, D. Zahner, F. Rominger, B. F. Straub, *ChemCatChem*, **2013**, 5, 2330–2335.
- [3] D. P. Zimin, D. V. Dar'in, V. A. Rassadin, V Y. Kukushkin, *Org. Lett.*, **2018**, 20, 4880–4884.
- [4] R. Berger, K. Duff, J. L. Leighton, *J. Am. Chem. Soc.*, **2004**, 126(18), 5686–5687
- [5] Y. Hu, Z. Zhang, J. Zhang, Y. Liu, I.D. Gridnev, W. Zhang, *Angew. Chem. Int. Ed.*, **2019**, 58(44), 15767-15771
